# Supplementary material for: Awareness of Appropriate Antibiotic Use in Primary Care for Influenza-Like Illness: Evidence of Improvement from UK Population-Based Surveys
Source: PubMed Central journal article supplement (PMC7601947; doi:10.3390/antibiotics9100690), 2020-10-13
Supplement: antibiotics-09-00690-s001.pdf [file antibiotics-09-00690-s001.pdf]

# SUPPLEMENTARY MATERIALS

1. Full Survey Instrument for Survey 1 (May-June 2015) (pp. 2–36):
2. Full Survey Instrument for Surveys 2 (Oct-Nov 2016) & 3 (March 2017) (pp. 37–89):
3. Supplementary Figures S1-S8 (pp. 90–98):

## Supplementary Survey Instrument: Survey 1 (May-June 2015)

### A questionnaire to better understand your views on different health conditions

Health service researchers and doctors in Oxford are carrying out a survey on attitudes to different health conditions that can affect people at some points in their lives. We are interested in learning more about your views on the nature, and the timing, of these health conditions. We are also interested in learning more about your views regarding the use of antibiotics.

Health can affect, and be affected by, many different aspects of life. The questionnaire also, therefore, asks a variety of questions about yourself – for example, your background, your income, and even your personality. Some of these questions may not seem to have obvious links to health, but it is important that we ask them, as your answers might help us to uncover some surprising and useful insights that could lead to improvements in healthcare.

Please be assured that any information you give will be anonymised, treated in strict confidence, and used solely for research purposes.

The questionnaire is divided into three sections. In total, it should take around 20 minutes to complete. Some of the questions may require a little thought, but please try to answer them all if you can. There are no right or wrong answers - we are simply interested in your views.

If you have any questions or comments relating to the questionnaire, please contact:

Dr. Laurence Roope  
Researcher  
Nuffield Department of Population Health  
University of Oxford  
Oxford OX3 7LF  
Email: [Laurence.Roope@dph.ox.ac.uk](mailto:Laurence.Roope@dph.ox.ac.uk)

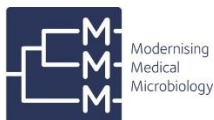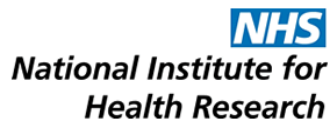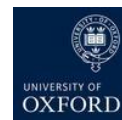

Throughout the following questions, except where instructed otherwise, please indicate your answer by entering an 'X' in the one box which you feel best describes your answer. Certain questions will need to be answered in a slightly different way, such as by entering a number in a box. In these cases, the instructions will be clearly indicated in the question.

## Section 1

We would like to begin the questionnaire by asking you a few questions about yourself.

1. What is your sex?

 Male Female Prefer not to say

2. How old were you on your last birthday? *Please indicate your answer by entering a number in the box below:*

 years

3. Which of the following apply to your current situation? *Please enter 'X' in the boxes beside all which apply.*

|                          |                              |
|--------------------------|------------------------------|
| <input type="checkbox"/> | Employed full-time           |
| <input type="checkbox"/> | Employed part-time           |
| <input type="checkbox"/> | Self-employed full-time      |
| <input type="checkbox"/> | Self-employed part-time      |
| <input type="checkbox"/> | Unemployed                   |
| <input type="checkbox"/> | Retired                      |
| <input type="checkbox"/> | Permanently sick or disabled |
| <input type="checkbox"/> | Looking after home or family |
| <input type="checkbox"/> | In full-time education       |
| <input type="checkbox"/> | Other                        |

4. What is the highest level of education or training you have attained?

|  |                                                                 |
|--|-----------------------------------------------------------------|
|  | GCSEs or 'O' Levels or CSEs or Scottish Standard Grade          |
|  | 'A' Levels or 'AS' Levels or Scottish Higher Grade              |
|  | International Baccalaureate                                     |
|  | Technical or Vocational Qualification                           |
|  | Transition Year Programme                                       |
|  | Higher Education Certificate or Diploma                         |
|  | Undergraduate Degree                                            |
|  | Professional Qualification (comparable to undergraduate degree) |
|  | Postgraduate Certificate or Diploma                             |
|  | Postgraduate Degree                                             |
|  | Doctorate                                                       |
|  | Other                                                           |
|  | None                                                            |

5. Are you currently married, in a civil partnership, or living with a partner?

Yes

No

6. Gross HOUSEHOLD income combines your income with that of your partner or any other household members with whom you share financial responsibilities BEFORE any taxes or deductions.

What is your gross annual household income?

|  |                    |
|--|--------------------|
|  | Up to £10,000      |
|  | £10,000 to £19,999 |
|  | £20,000 to £29,999 |
|  | £30,000 to £39,999 |
|  | £40,000 to £49,999 |
|  | £50,000 to £74,999 |
|  | £75,000 to £99,999 |
|  | £100,000 or more   |
|  | Prefer not to say  |

7. Do you have any dependent children who live with you? (By 'dependent' children, we mean those who are under 18 but not yet financially independent).

Yes

No

*[If no, go to question 8].*

How many dependent children do you have who live with you? *Please indicate your answer by entering a number in the box below:*

How old is your youngest dependent child who lives with you? \* *Please indicate your answer by entering a number in one of the boxes below. If your child is less than 2 years old, please answer in months; otherwise answer in years.*

Years

Months

\* [If respondent indicates that they have only one dependent child who lives with them, amend text to "And how old is this child"?]

8. How many adults live in your household? (This refers to *all* adults so please don't forget to include yourself and any children aged 18 or over, who live with you. Please also include any children aged 16 or 17 who live with you, if they are financially independent). *Please indicate your answer by entering a number in the box below:*

9. Were you born in the UK?

Yes

No

10. How would you describe your ethnicity or background?

|                          |                                             |
|--------------------------|---------------------------------------------|
| <input type="checkbox"/> | White                                       |
| <input type="checkbox"/> | Mixed / multiple ethnic groups              |
| <input type="checkbox"/> | Black / African / Caribbean / Black British |
| <input type="checkbox"/> | Asian / Asian British                       |
| <input type="checkbox"/> | Other ethnic group                          |
| <input type="checkbox"/> | Prefer not to say                           |

11. What, if any, is your religion?

|                          |                           |
|--------------------------|---------------------------|
| <input type="checkbox"/> | No religion               |
| <input type="checkbox"/> | Christianity (Protestant) |
| <input type="checkbox"/> | Christianity (Catholic)   |
| <input type="checkbox"/> | Christianity (Other)      |
| <input type="checkbox"/> | Islam                     |
| <input type="checkbox"/> | Hinduism                  |
| <input type="checkbox"/> | Sikhism                   |
| <input type="checkbox"/> | Judaism                   |
| <input type="checkbox"/> | Buddhism                  |
| <input type="checkbox"/> | Other religion            |
| <input type="checkbox"/> | Prefer not to say         |

12. Which of the following best describes where you live?

|  |                          |
|--|--------------------------|
|  | South East               |
|  | London                   |
|  | North West               |
|  | East of England          |
|  | West Midlands            |
|  | South West               |
|  | Yorkshire and the Humber |
|  | East Midlands            |
|  | North East               |
|  | Scotland                 |
|  | Wales                    |
|  | Northern Ireland         |

We would like to conclude this section by asking you a few questions about your lifestyle.

13. Do you smoke tobacco?

*Yes - every day*

*Yes - but not every day*

*No*

*[If respondent chooses one of the first two options, go to question 15].*

14. Have you ever smoked tobacco?

*Yes – I used to smoke every day*

*Yes – I used to smoke, but not every day*

*Yes – but I tried it only once or a few times*

*No*

15. Have you ever tried electronic cigarettes?

*Yes*

*No*

16. How often do you drink alcohol?

*Never*

*Less than once a month*

*1 to 3 times a month*

*Once or twice a week*

*Three or more times a week*

*[If respondent chooses "Never" go to Section 2]*

17. How often do you drink five or more alcoholic drinks on one occasion?

*Never*

*Less than once a month*

*1 to 3 times a month*

*Once or twice a week*

*Three or more times a week*

## Section 2

We would like to begin this section by asking you to imagine two health states, which we will call Health State A and Health State B.

**Health State A:** *You have a fever, aching muscles, a headache, a dry chesty cough, a sore throat, and tiredness.*

**Health State B:** *You have a fever, chest pain, night sweats, a cough that brings up phlegm, loss of appetite, extreme tiredness, and some weight loss.*

[NOTE: Health State A and Health State B to remain on screen for all questions in which they are referred to]

Drawn below is a scale, where the **best** health state you can imagine is marked **10** (we will call this 'Full Health'), and the **worst** health state you can imagine is marked **0**.

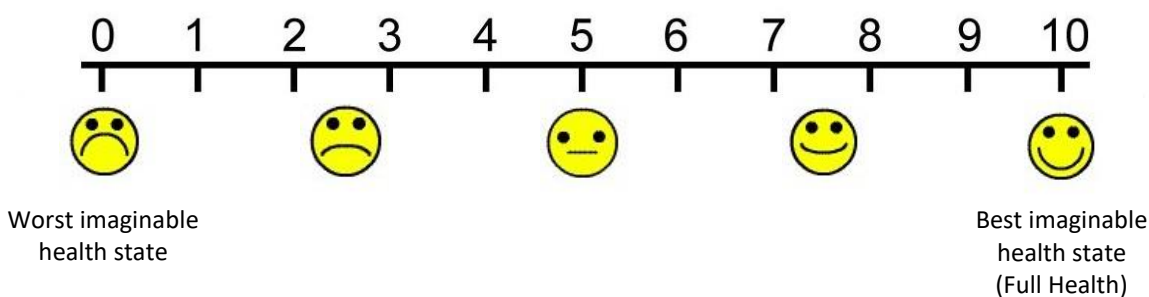

1. How would you rate Health State A on this scale? *Please do so by writing a number between 0 and 10 in the box below.*

2. How would you rate Health State B on this scale? *Please do so by writing a number between 0 and 10 in the box below.*

3. How would you rate your own health today on this scale? *Please do this by writing a number between 0 and 10 in the box below.*

[If the number given to answer Q1 is less than the number given to answer Q2, go to Q7].

The following questions are about the timing of different health states. You have indicated that you regard Health State B as being worse than Health State A. However, some people might accept being in severely poor health at some point in the future, if it meant that they could avoid being in moderately poor health at the present time.



4. In this question, assume that if either Health State A or B occurs it will last for two weeks. Apart from those two weeks, you will be in Full Health.

(a) Which of the following options would you prefer?

Option 1: Health State A now (2015)

|                       |                    |                    |                    |                    |                    |                    |                    |                    |                    |
|-----------------------|--------------------|--------------------|--------------------|--------------------|--------------------|--------------------|--------------------|--------------------|--------------------|
| <b>Health State A</b> | <b>Full Health</b> | <b>Full Health</b> | <b>Full Health</b> | <b>Full Health</b> | <b>Full Health</b> | <b>Full Health</b> | <b>Full Health</b> | <b>Full Health</b> | <b>Full Health</b> |
| 2015                  | 2017               | 2019               | 2021               | 2023               | 2025               | 2027               | 2029               | 2031               | 2033               |

or

Option 2: Health State B in 10 years' time (2025)

|                    |                    |                    |                    |                    |                       |                    |                    |                    |                    |
|--------------------|--------------------|--------------------|--------------------|--------------------|-----------------------|--------------------|--------------------|--------------------|--------------------|
| <b>Full Health</b> | <b>Full Health</b> | <b>Full Health</b> | <b>Full Health</b> | <b>Full Health</b> | <b>Health State B</b> | <b>Full Health</b> | <b>Full Health</b> | <b>Full Health</b> | <b>Full Health</b> |
| 2015               | 2017               | 2019               | 2021               | 2023               | 2025                  | 2027               | 2029               | 2031               | 2033               |

**Option 1:** Health State A now (2015)

**Option 2:** Health State B in 10 years' time (2025)

[If Option 2, go to part (f)]

(b) Which of the following options would you prefer?

Option 1: Health State A now (2015)

|                       |                    |                    |                    |                    |                    |                    |                    |                    |                    |
|-----------------------|--------------------|--------------------|--------------------|--------------------|--------------------|--------------------|--------------------|--------------------|--------------------|
| <b>Health State A</b> | <b>Full Health</b> | <b>Full Health</b> | <b>Full Health</b> | <b>Full Health</b> | <b>Full Health</b> | <b>Full Health</b> | <b>Full Health</b> | <b>Full Health</b> | <b>Full Health</b> |
| 2015                  | 2017               | 2019               | 2021               | 2023               | 2025               | 2027               | 2029               | 2031               | 2033               |

or

Option 2: Health State B in 18 years' time (2033)

|                    |                    |                    |                    |                    |                    |                    |                    |                    |                       |
|--------------------|--------------------|--------------------|--------------------|--------------------|--------------------|--------------------|--------------------|--------------------|-----------------------|
| <b>Full Health</b> | <b>Full Health</b> | <b>Full Health</b> | <b>Full Health</b> | <b>Full Health</b> | <b>Full Health</b> | <b>Full Health</b> | <b>Full Health</b> | <b>Full Health</b> | <b>Health State B</b> |
| 2015               | 2017               | 2019               | 2021               | 2023               | 2025               | 2027               | 2029               | 2031               | 2033                  |

**Option 1:** Health State A now (2015)

**Option 2:** Health State B in 18 years' time (2033)

[If Option 1, go to part (j)]

(c) Which of the following options would you prefer?

Option 1: Health State A now (2015)

|                       |                    |                    |                    |                    |                    |                    |                    |                    |                    |
|-----------------------|--------------------|--------------------|--------------------|--------------------|--------------------|--------------------|--------------------|--------------------|--------------------|
| <b>Health State A</b> | <b>Full Health</b> | <b>Full Health</b> | <b>Full Health</b> | <b>Full Health</b> | <b>Full Health</b> | <b>Full Health</b> | <b>Full Health</b> | <b>Full Health</b> | <b>Full Health</b> |
| 2015                  | 2017               | 2019               | 2021               | 2023               | 2025               | 2027               | 2029               | 2031               | 2033               |

or

Option 2: Health State B in 14 years' time (2029)

|                    |                    |                    |                    |                    |                    |                    |                       |                    |                    |
|--------------------|--------------------|--------------------|--------------------|--------------------|--------------------|--------------------|-----------------------|--------------------|--------------------|
| <b>Full Health</b> | <b>Full Health</b> | <b>Full Health</b> | <b>Full Health</b> | <b>Full Health</b> | <b>Full Health</b> | <b>Full Health</b> | <b>Health State B</b> | <b>Full Health</b> | <b>Full Health</b> |
| 2015               | 2017               | 2019               | 2021               | 2023               | 2025               | 2027               | 2029                  | 2031               | 2033               |

**Option 1:** Health State A now (2015)

**Option 2:** Health State B in 14 years' time (2029)

*[If Option 2, go to part (e)]*

(d) Which of the following options would you prefer?

Option 1: Health State A now (2015)

|                       |                    |                    |                    |                    |                    |                    |                    |                    |                    |
|-----------------------|--------------------|--------------------|--------------------|--------------------|--------------------|--------------------|--------------------|--------------------|--------------------|
| <b>Health State A</b> | <b>Full Health</b> | <b>Full Health</b> | <b>Full Health</b> | <b>Full Health</b> | <b>Full Health</b> | <b>Full Health</b> | <b>Full Health</b> | <b>Full Health</b> | <b>Full Health</b> |
| 2015                  | 2017               | 2019               | 2021               | 2023               | 2025               | 2027               | 2029               | 2031               | 2033               |

or

Option 2: Health State B in 16 years' time (2031)

|                    |                    |                    |                    |                    |                    |                    |                    |                       |                    |
|--------------------|--------------------|--------------------|--------------------|--------------------|--------------------|--------------------|--------------------|-----------------------|--------------------|
| <b>Full Health</b> | <b>Full Health</b> | <b>Full Health</b> | <b>Full Health</b> | <b>Full Health</b> | <b>Full Health</b> | <b>Full Health</b> | <b>Full Health</b> | <b>Health State B</b> | <b>Full Health</b> |
| 2015               | 2017               | 2019               | 2021               | 2023               | 2025               | 2027               | 2029               | 2031                  | 2033               |

**Option 1:** Health State A now (2015)

**Option 2:** Health State B in 16 years' time (2031)

*[Now go to question 5]*

(e) Which of the following options would you prefer?

Option 1: Health State A now (2015)

|                |             |             |             |             |             |             |             |             |             |
|----------------|-------------|-------------|-------------|-------------|-------------|-------------|-------------|-------------|-------------|
| Health State A | Full Health | Full Health | Full Health | Full Health | Full Health | Full Health | Full Health | Full Health | Full Health |
| 2015           | 2017        | 2019        | 2021        | 2023        | 2025        | 2027        | 2029        | 2031        | 2033        |

or

Option 2: Health State B in 12 years' time (2027)

|             |             |             |             |             |             |                |             |             |             |
|-------------|-------------|-------------|-------------|-------------|-------------|----------------|-------------|-------------|-------------|
| Full Health | Full Health | Full Health | Full Health | Full Health | Full Health | Health State B | Full Health | Full Health | Full Health |
| 2015        | 2017        | 2019        | 2021        | 2023        | 2025        | 2027           | 2029        | 2031        | 2033        |

**Option 1:** Health State A now (2015)

**Option 2:** Health State B in 12 years' time (2027)

[Now go to question 5]

(f) Which of the following options would you prefer?

Option 1: Health State A now (2015)

|                |             |             |             |             |             |             |             |             |             |
|----------------|-------------|-------------|-------------|-------------|-------------|-------------|-------------|-------------|-------------|
| Health State A | Full Health | Full Health | Full Health | Full Health | Full Health | Full Health | Full Health | Full Health | Full Health |
| 2015           | 2017        | 2019        | 2021        | 2023        | 2025        | 2027        | 2029        | 2031        | 2033        |

or

Option 2: Health State B in 2 years' time (2017)

|             |                |             |             |             |             |             |             |             |             |
|-------------|----------------|-------------|-------------|-------------|-------------|-------------|-------------|-------------|-------------|
| Full Health | Health State B | Full Health | Full Health | Full Health | Full Health | Full Health | Full Health | Full Health | Full Health |
| 2015        | 2017           | 2019        | 2021        | 2023        | 2025        | 2027        | 2029        | 2031        | 2033        |

**Option 1:** Health State A now (2015)

**Option 2:** Health State B in 2 years' time (2017)

[If Option 2, go to question 5]

(g) Which of the following options would you prefer?

Option 1: Health State A now (2015)

|                |             |             |             |             |             |             |             |             |             |
|----------------|-------------|-------------|-------------|-------------|-------------|-------------|-------------|-------------|-------------|
| Health State A | Full Health | Full Health | Full Health | Full Health | Full Health | Full Health | Full Health | Full Health | Full Health |
| 2015           | 2017        | 2019        | 2021        | 2023        | 2025        | 2027        | 2029        | 2031        | 2033        |

or

Option 2: Health State B in 6 years' time (2021)

|             |             |             |                |             |             |             |             |             |             |
|-------------|-------------|-------------|----------------|-------------|-------------|-------------|-------------|-------------|-------------|
| Full Health | Full Health | Full Health | Health State B | Full Health | Full Health | Full Health | Full Health | Full Health | Full Health |
| 2015        | 2017        | 2019        | 2021           | 2023        | 2025        | 2027        | 2029        | 2031        | 2033        |

**Option 1:** Health State A now (2015)

**Option 2:** Health State B in 6 years' time (2021)

*[If Option 1, go to part (i)]*

(h) Which of the following options would you prefer?

Option 1: Health State A now (2015)

|                |             |             |             |             |             |             |             |             |             |
|----------------|-------------|-------------|-------------|-------------|-------------|-------------|-------------|-------------|-------------|
| Health State A | Full Health | Full Health | Full Health | Full Health | Full Health | Full Health | Full Health | Full Health | Full Health |
| 2015           | 2017        | 2019        | 2021        | 2023        | 2025        | 2027        | 2029        | 2031        | 2033        |

or

Option 2: Health State B in 4 years' time (2019)

|             |             |                |             |             |             |             |             |             |             |
|-------------|-------------|----------------|-------------|-------------|-------------|-------------|-------------|-------------|-------------|
| Full Health | Full Health | Health State B | Full Health | Full Health | Full Health | Full Health | Full Health | Full Health | Full Health |
| 2015        | 2017        | 2019           | 2021        | 2023        | 2025        | 2027        | 2029        | 2031        | 2033        |

**Option 1:** Health State A now (2015)

**Option 2:** Health State B in 4 years' time (2019)

*[Now go to question 5]*

(i) Which of the following options would you prefer?

Option 1: Health State A now (2015)

|                |             |             |             |             |             |             |             |             |             |
|----------------|-------------|-------------|-------------|-------------|-------------|-------------|-------------|-------------|-------------|
| Health State A | Full Health | Full Health | Full Health | Full Health | Full Health | Full Health | Full Health | Full Health | Full Health |
| 2015           | 2017        | 2019        | 2021        | 2023        | 2025        | 2027        | 2029        | 2031        | 2033        |

or

Option 2: Health State B in 8 years' time (2023)

|             |             |             |             |                |             |             |             |             |             |
|-------------|-------------|-------------|-------------|----------------|-------------|-------------|-------------|-------------|-------------|
| Full Health | Full Health | Full Health | Full Health | Health State B | Full Health | Full Health | Full Health | Full Health | Full Health |
| 2015        | 2017        | 2019        | 2021        | 2023           | 2025        | 2027        | 2029        | 2031        | 2033        |

**Option 1:** Health State A now (2015)

**Option 2:** Health State B in 8 years' time (2023)

*[Now go to question 5]*

(j) Is there any far off time in the future at which being in Health State B would be preferable to being in Health State A today?

Please indicate your answer by writing a number in the box below. (If you would never prefer Health State B at any point in the future, to Health State A today, please write the letter "N" in the box below, instead of a number).

"Rather than Health State A today, I would prefer Health State B, providing it were at least

years from now."

*[If "N", go to Q6.]*

5. In this question, again assume that if either Health State A or B occurs it will last for two weeks. Apart from those two weeks, you will be in Full Health.

(a) Which of the following options would you prefer?

Option 1: Health State A in 2 years' time (2017)

|             |                |             |             |             |             |             |             |             |             |             |
|-------------|----------------|-------------|-------------|-------------|-------------|-------------|-------------|-------------|-------------|-------------|
| Full Health | Health State A | Full Health | Full Health | Full Health | Full Health | Full Health | Full Health | Full Health | Full Health | Full Health |
| 2015        | 2017           | 2019        | 2021        | 2023        | 2025        | 2027        | 2029        | 2031        | 2033        | 2035        |

or

Option 2: Health State B in 12 years' time (2027)

|             |             |             |             |             |             |                |             |             |             |             |
|-------------|-------------|-------------|-------------|-------------|-------------|----------------|-------------|-------------|-------------|-------------|
| Full Health | Full Health | Full Health | Full Health | Full Health | Full Health | Health State B | Full Health | Full Health | Full Health | Full Health |
| 2015        | 2017        | 2019        | 2021        | 2023        | 2025        | 2027           | 2029        | 2031        | 2033        | 2035        |

**Option 1:** Health State A in 2 years' time (2017)

**Option 2:** Health State B in 12 years' time (2027)

*[If Option 2, go to part (f)]*

(b) Which of the following options would you prefer?

Option 1: Health State A in 2 years' time (2017)

|             |                |             |             |             |             |             |             |             |             |             |
|-------------|----------------|-------------|-------------|-------------|-------------|-------------|-------------|-------------|-------------|-------------|
| Full Health | Health State A | Full Health | Full Health | Full Health | Full Health | Full Health | Full Health | Full Health | Full Health | Full Health |
| 2015        | 2017           | 2019        | 2021        | 2023        | 2025        | 2027        | 2029        | 2031        | 2033        | 2035        |

or

Option 2: Health State B in 20 years' time (2035)

|             |             |             |             |             |             |             |             |             |             |                |
|-------------|-------------|-------------|-------------|-------------|-------------|-------------|-------------|-------------|-------------|----------------|
| Full Health | Full Health | Full Health | Full Health | Full Health | Full Health | Full Health | Full Health | Full Health | Full Health | Health State B |
| 2015        | 2017        | 2019        | 2021        | 2023        | 2025        | 2027        | 2029        | 2031        | 2033        | 2035           |

**Option 1:** Health State A in 2 years' time (2017)

**Option 2:** Health State B in 20 years' time (2035)

*[If Option 1, go to part (j)]*

(c) Which of the following options would you prefer?

Option 1: Health State A in 2 years' time (2017)

|             |                |             |             |             |             |             |             |             |             |             |
|-------------|----------------|-------------|-------------|-------------|-------------|-------------|-------------|-------------|-------------|-------------|
| Full Health | Health State A | Full Health | Full Health | Full Health | Full Health | Full Health | Full Health | Full Health | Full Health | Full Health |
| 2015        | 2017           | 2019        | 2021        | 2023        | 2025        | 2027        | 2029        | 2031        | 2033        | 2035        |

or

Option 2: Health State B in 16 years' time (2031)

|             |             |             |             |             |             |             |             |                |             |             |
|-------------|-------------|-------------|-------------|-------------|-------------|-------------|-------------|----------------|-------------|-------------|
| Full Health | Full Health | Full Health | Full Health | Full Health | Full Health | Full Health | Full Health | Health State B | Full Health | Full Health |
| 2015        | 2017        | 2019        | 2021        | 2023        | 2025        | 2027        | 2029        | 2031           | 2033        | 2035        |

**Option 1:** Health State A in 2 years' time (2017)

**Option 2:** Health State B in 16 years' time (2031)

*[If Option 2, go to part (e)]*

(d) Which of the following options would you prefer?

Option 1: Health State A in 2 years' time (2017)

|                |                   |                |                |                |                |                |                |                |                |                |
|----------------|-------------------|----------------|----------------|----------------|----------------|----------------|----------------|----------------|----------------|----------------|
| Full<br>Health | Health<br>State A | Full<br>Health | Full<br>Health | Full<br>Health | Full<br>Health | Full<br>Health | Full<br>Health | Full<br>Health | Full<br>Health | Full<br>Health |
| 2015           | 2017              | 2019           | 2021           | 2023           | 2025           | 2027           | 2029           | 2031           | 2033           | 2035           |

or

Option 2: Health State B in 18 years' time (2033)

|                |                |                |                |                |                |                |                |                |                   |                |
|----------------|----------------|----------------|----------------|----------------|----------------|----------------|----------------|----------------|-------------------|----------------|
| Full<br>Health | Full<br>Health | Full<br>Health | Full<br>Health | Full<br>Health | Full<br>Health | Full<br>Health | Full<br>Health | Full<br>Health | Health<br>State B | Full<br>Health |
| 2015           | 2017           | 2019           | 2021           | 2023           | 2025           | 2027           | 2029           | 2031           | 2033              | 2035           |

**Option 1:** Health State A in 2 years' time (2017)

**Option 2:** Health State B in 18 years' time (2033)

*[Now go to question 6]*

(e) Which of the following options would you prefer?

Option 1: Health State A in 2 years' time (2017)

|                |                   |                |                |                |                |                |                |                |                |                |
|----------------|-------------------|----------------|----------------|----------------|----------------|----------------|----------------|----------------|----------------|----------------|
| Full<br>Health | Health<br>State A | Full<br>Health | Full<br>Health | Full<br>Health | Full<br>Health | Full<br>Health | Full<br>Health | Full<br>Health | Full<br>Health | Full<br>Health |
| 2015           | 2017              | 2019           | 2021           | 2023           | 2025           | 2027           | 2029           | 2031           | 2033           | 2035           |

or

Option 2: Health State B in 14 years' time (2029)

|                |                |                |                |                |                |                |                   |                |                |                |
|----------------|----------------|----------------|----------------|----------------|----------------|----------------|-------------------|----------------|----------------|----------------|
| Full<br>Health | Full<br>Health | Full<br>Health | Full<br>Health | Full<br>Health | Full<br>Health | Full<br>Health | Health<br>State B | Full<br>Health | Full<br>Health | Full<br>Health |
| 2015           | 2017           | 2019           | 2021           | 2023           | 2025           | 2027           | 2029              | 2031           | 2033           | 2035           |

**Option 1:** Health State A in 2 years' time (2017)

**Option 2:** Health State B in 14 years' time (2029)

[Now go to question 6]

(f) Which of the following options would you prefer?

Option 1: Health State A in 2 years' time (2017)

|             |                |             |             |             |             |             |             |             |             |             |
|-------------|----------------|-------------|-------------|-------------|-------------|-------------|-------------|-------------|-------------|-------------|
| Full Health | Health State A | Full Health | Full Health | Full Health | Full Health | Full Health | Full Health | Full Health | Full Health | Full Health |
| 2015        | 2017           | 2019        | 2021        | 2023        | 2025        | 2027        | 2029        | 2031        | 2033        | 2035        |

or

Option 2: Health State B in 4 years' time (2019)

|             |             |                |             |             |             |             |             |             |             |             |
|-------------|-------------|----------------|-------------|-------------|-------------|-------------|-------------|-------------|-------------|-------------|
| Full Health | Full Health | Health State B | Full Health | Full Health | Full Health | Full Health | Full Health | Full Health | Full Health | Full Health |
| 2015        | 2017        | 2019           | 2021        | 2023        | 2025        | 2027        | 2029        | 2031        | 2033        | 2035        |

**Option 1:** Health State A in 2 years' time (2017)

**Option 2:** Health State B in 4 years' time (2019)

[If Option 2, go to question 6]

(g) Which of the following options would you prefer?

Option 1: Health State A in 2 years' time (2017)

|             |                |             |             |             |             |             |             |             |             |             |
|-------------|----------------|-------------|-------------|-------------|-------------|-------------|-------------|-------------|-------------|-------------|
| Full Health | Health State A | Full Health | Full Health | Full Health | Full Health | Full Health | Full Health | Full Health | Full Health | Full Health |
| 2015        | 2017           | 2019        | 2021        | 2023        | 2025        | 2027        | 2029        | 2031        | 2033        | 2035        |

or

Option 2: Health State B in 8 years' time (2023)

|             |             |             |             |                |             |             |             |             |             |             |
|-------------|-------------|-------------|-------------|----------------|-------------|-------------|-------------|-------------|-------------|-------------|
| Full Health | Full Health | Full Health | Full Health | Health State B | Full Health | Full Health | Full Health | Full Health | Full Health | Full Health |
| 2015        | 2017        | 2019        | 2021        | 2023           | 2025        | 2027        | 2029        | 2031        | 2033        | 2035        |

**Option 1:** Health State A in 2 years' time (2017)

**Option 2:** Health State B in 8 years' time (2023)

[If Option 1, go to part (i)]



(h) Which of the following options would you prefer?

Option 1: Health State A in 2 years' time (2017)

|                |                   |                |                |                |                |                |                |                |                |                |
|----------------|-------------------|----------------|----------------|----------------|----------------|----------------|----------------|----------------|----------------|----------------|
| Full<br>Health | Health<br>State A | Full<br>Health | Full<br>Health | Full<br>Health | Full<br>Health | Full<br>Health | Full<br>Health | Full<br>Health | Full<br>Health | Full<br>Health |
| 2015           | 2017              | 2019           | 2021           | 2023           | 2025           | 2027           | 2029           | 2031           | 2033           | 2035           |

or

Option 2: Health State B in 6 years' time (2021)

|                |                |                |                   |                |                |                |                |                |                |                |
|----------------|----------------|----------------|-------------------|----------------|----------------|----------------|----------------|----------------|----------------|----------------|
| Full<br>Health | Full<br>Health | Full<br>Health | Health<br>State B | Full<br>Health | Full<br>Health | Full<br>Health | Full<br>Health | Full<br>Health | Full<br>Health | Full<br>Health |
| 2015           | 2017           | 2019           | 2021              | 2023           | 2025           | 2027           | 2029           | 2031           | 2033           | 2035           |

**Option 1:** Health State A in 2 years' time (2017)

**Option 2:** Health State B in 6 years' time (2021)

[Now go to question 6]

(i) Which of the following options would you prefer?

Option 1: Health State A in 2 years' time (2017)

|                |                   |                |                |                |                |                |                |                |                |                |
|----------------|-------------------|----------------|----------------|----------------|----------------|----------------|----------------|----------------|----------------|----------------|
| Full<br>Health | Health<br>State A | Full<br>Health | Full<br>Health | Full<br>Health | Full<br>Health | Full<br>Health | Full<br>Health | Full<br>Health | Full<br>Health | Full<br>Health |
| 2015           | 2017              | 2019           | 2021           | 2023           | 2025           | 2027           | 2029           | 2031           | 2033           | 2035           |

or

Option 2: Health State B in 10 years' time (2025)

|                |                |                |                |                |                   |                |                |                |                |                |
|----------------|----------------|----------------|----------------|----------------|-------------------|----------------|----------------|----------------|----------------|----------------|
| Full<br>Health | Full<br>Health | Full<br>Health | Full<br>Health | Full<br>Health | Health<br>State B | Full<br>Health | Full<br>Health | Full<br>Health | Full<br>Health | Full<br>Health |
| 2015           | 2017           | 2019           | 2021           | 2023           | 2025              | 2027           | 2029           | 2031           | 2033           | 2035           |

**Option 1:** Health State A in 2 years' time (2017)

**Option 2:** Health State B in 10 years' time (2025)

[Now go to question 6]

(j) Is there any far off time in the future at which being in Health State B would be preferable to being in Health State A two years' from now (ie. in 2017)?

Please indicate your answer by writing a number in the box below. (If you would never prefer Health State B at any point in the future, to Health State A two years from now, please write the letter "N" in the box below, instead of a number).

"Rather than Health State A two years' from now, I would prefer Health State B, providing it were at least  years from now."

6. This question is about views on risks to health. You have two options, 1 and 2. The options vary in terms of your health state over the next two weeks.

In option 1, there is a chance of being in Full Health, but also a chance of being in Health State B. So option 1 is like a lottery: you might be in Full Health, but you may also be in Health State B. You do not know beforehand which of these health states you will experience: Full Health or Health State B.

In option 2, you will definitely be in Health State A.

In the following questions, we will vary the chance of Full Health in Option 1 and, in each case, ask you to say whether you prefer Option 1 or Option 2 by marking an 'X' in the appropriate box.

(a) Which option do you prefer:

| <b>Option 1</b>                                                                                                                                                                                                                                   | <b>Option 2</b>                                                                                                 |
|---------------------------------------------------------------------------------------------------------------------------------------------------------------------------------------------------------------------------------------------------|-----------------------------------------------------------------------------------------------------------------|
| 5 out of 10 chance of Full Health <br>5 out of 10 chance of Health State B  | Definitely Health State A  |
| <br>                                                                        |                             |

**Option 1: 5 out of 10** chance of Full Health, and **5 out of 10** chance of Health State B

or

**Option 2:** Definitely Health State A

*[If Option 2, go to part (f)]*

(b) Which option do you prefer:

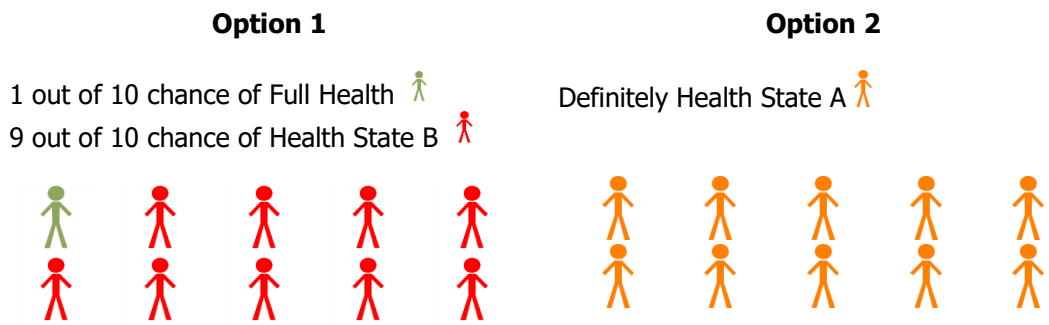

**Option 1: 1 out of 10** chance of Full Health, and **9 out of 10** chance of Health State B

or

**Option 2:** Definitely Health State A

*[If Option 1, go to question 7]*

(c) Which option do you prefer:

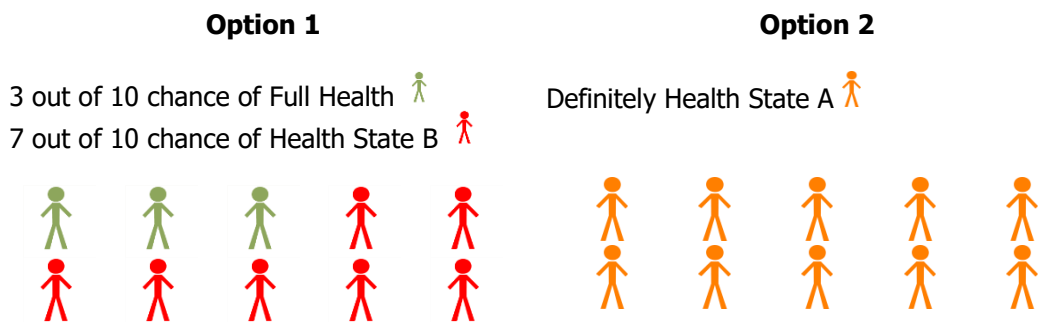

**Option 1: 3 out of 10** chance of Full Health, and **7 out of 10** chance of Health State B

or

**Option 2:** Definitely Health State A

*[If Option 2, go to part (e)]*

(d) Which option do you prefer:

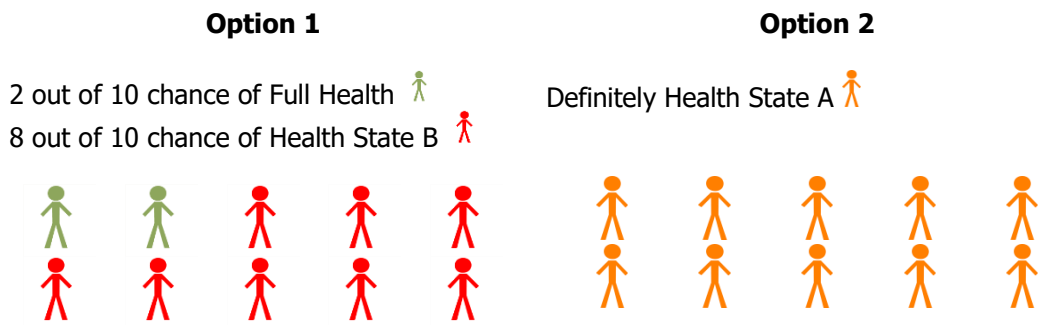

**Option 1: 2 out of 10** chance of Full Health, and **8 out of 10** chance of Health State B

or

**Option 2:** Definitely Health State A

*[Now go to question 7]*

(e) Which option do you prefer:

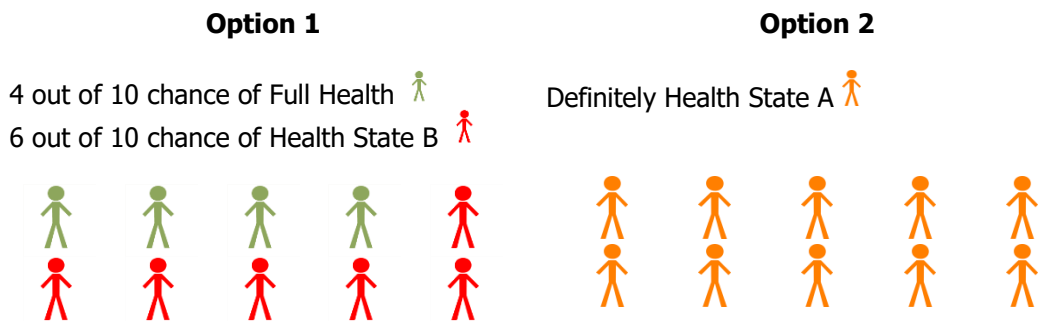

**Option 1: 4 out of 10** chance of Full Health, and **6 out of 10** chance of Health State B

or

**Option 2:** Definitely Health State A

*[Now go to question 7]*

(f) Which option do you prefer:

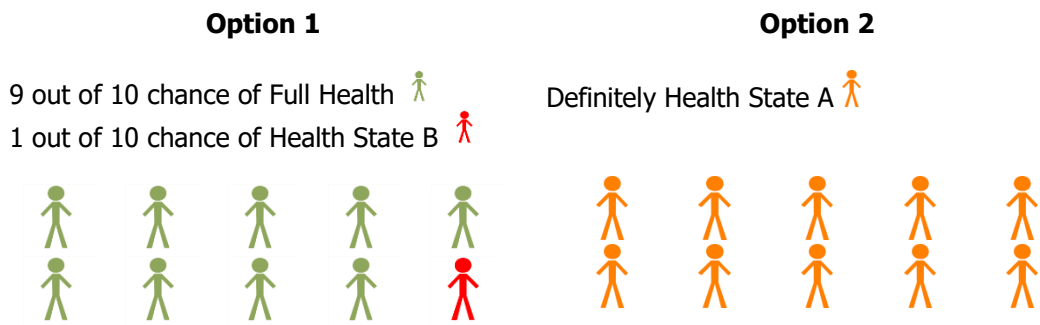

**Option 1: 9 out of 10** chance of Full Health, and **1 out of 10** chance of Health State B  
or

**Option 2:** Definitely Health State A

*[If Option 2, go to part (j)]*

(g) Which option do you prefer:

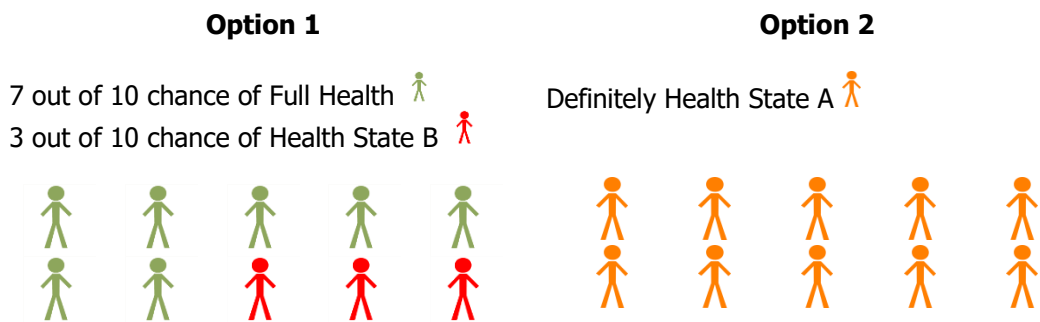

**Option 1: 7 out of 10** chance of Full Health, and **3 out of 10** chance of Health State B  
or

**Option 2:** Definitely Health State A

*[If Option 2, go to part (i)]*

(h) Which option do you prefer:

**Option 1**

6 out of 10 chance of Full Health   
4 out of 10 chance of Health State B 

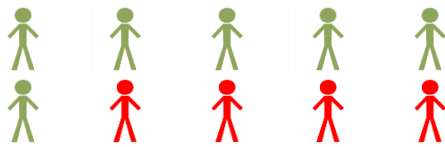

**Option 2**

Definitely Health State A 

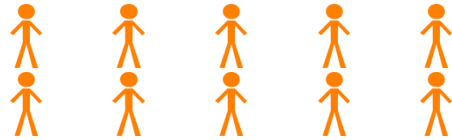

**Option 1: 6 out of 10** chance of Full Health, and **4 out of 10** chance of Health State B  
or

**Option 2:** Definitely Health State A

*[Now go to question 7]*

(i) Which option do you prefer:

**Option 1**

8 out of 10 chance of Full Health   
2 out of 10 chance of Health State B 

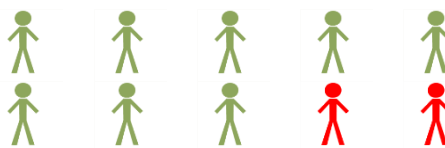

**Option 2**

Definitely Health State A 

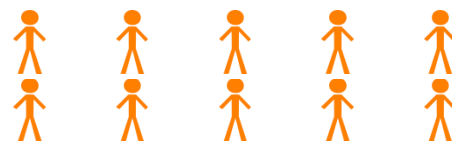

**Option 1: 8 out of 10** chance of Full Health, and **2 out of 10** chance of Health State B  
or

**Option 2:** Definitely Health State A

*[Now go to question 7]*

(j) You have indicated that you would not prefer Option 1 to Option 2 even if the chance of Health State B in Option 1 was as low as 1 out of 10. How low would the chance of Health State B in Option 1 (probably Full Health but a small chance of Health State B) need to be for you to prefer Option 1 to Option 2 (Definitely Health State A)?

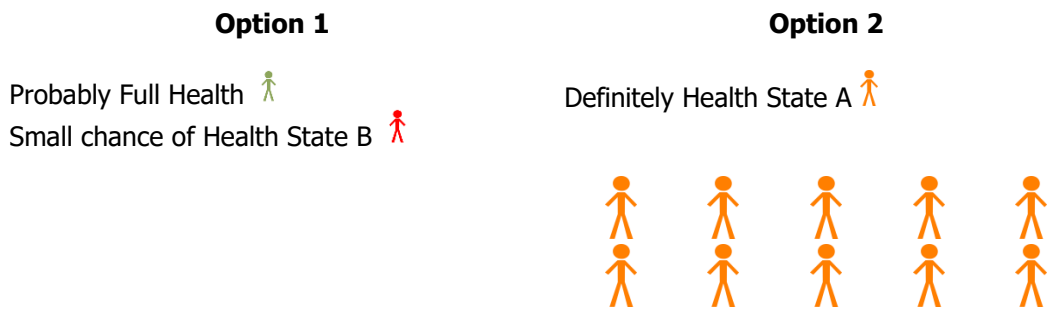

Please indicate your answer by writing a number bigger than 10 in the box below; the number can be as big as you want, with as many digits as you need. (If you would never prefer Option 1, no matter how unlikely Health State B is, please write the letter "N" in the box instead of a number).

I would prefer Option 1 to Option 2, if the chance of Health State B in Option 1 was less than 1 out of

7. Now imagine that you have been in **Health State A** for the last five days: You have a fever, aching muscles, a headache, a dry chesty cough, a sore throat and tiredness.

(a) Do you think you would go to see a GP about this condition?

- Definitely
- Probably
- Probably not
- Definitely not
- Don't know

*[If 'definitely not,' go to part (c)]*

(b) If you went to see a GP about this condition, do you think you would request antibiotics?

Definitely

Probably

Probably not

Definitely not

Don't know

(c) Do you think antibiotics would be likely to help this condition?

Definitely

Probably

Probably not

Definitely not

Don't know

(d) Have you taken antibiotics for a condition similar to Health State A in the last 12 months?

Yes

No

(e) Have you taken antibiotics for any other health conditions in the last 12 months?



Yes No

*[If respondent answers 'No' in both parts (d) and (e), go to part (g)].*

(f) During the last 12 months, on how many separate occasions have you been unwell and taken a course of antibiotics? Please indicate your answer by entering a number in the box below:

(g) If you were prescribed antibiotics for a health condition (not necessarily one described in this questionnaire) do you think you would take the full course?

 Definitely Probably Probably not Definitely not Don't know

*[If respondent answered "no" to the first part of question 7 in Section 1 (i.e. if they have no dependent children), go to question 9]*

8. This question is about the health of your child. (If you have more than one child, think of your youngest child).

Imagine that your child has been in **Health State A** for the last five days: He/she has a fever, aching muscles, a headache, a dry chesty cough, a sore throat and tiredness.

(a) Do you think you would take your child to see a GP in this situation?

 Definitely Probably Probably not

Definitely not

Don't know

*[If 'definitely not,' go to part (c)]*

(b) If you did take your child to see a GP in this situation, do you think you would request antibiotics?

Definitely

Probably

Probably not

Definitely not

Don't know

(c) Do you think antibiotics would be likely to help your child in this situation?

Definitely

Probably

Probably not

Definitely not

Don't know

(d) Has your child taken antibiotics for a condition similar to Health State A in the last 12 months?

Yes

No

(e) Has your child taken antibiotics for any other health conditions in the last 12 months?

Yes

No

*[If respondent answers 'No' in both parts (d) and (e), go to part (g)].*

(f) During the last 12 months, on how many separate occasions has your child been unwell and taken a course of antibiotics? Please indicate your answer by entering a number in the box below:

(g) If your child were prescribed antibiotics for a health condition (not necessarily one described in this questionnaire) do you think you would make them take the full course?

Definitely

Probably

Probably not

Definitely not

Don't know

9. This question is a hypothetical one. It concerns both your health and that of five other people who you do not know. You do not know anything about the five other people, except that they live somewhere in the UK. They are complete strangers to you.

Imagine two situations, which differ in terms of your health and the health of these five other people over the next week. Let's call these situations 1 and 2.

**Situation 1:** You are in Full Health; the 5 other people are suffering from Health State A (i.e. they have a fever, aching muscles, a headache, a dry chesty cough, a sore throat and tiredness).

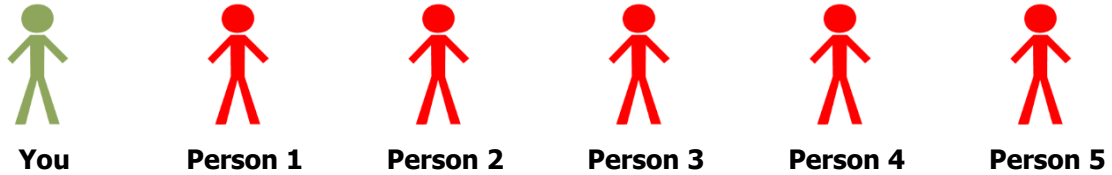

**You are in Full Health**

**The 5 other people are in Health State A.**

**Situation 2:** You are suffering from Health State A (i.e. you have a fever, aching muscles, a headache, a dry chesty cough, a sore throat and tiredness); the 5 other people are in Full Health.

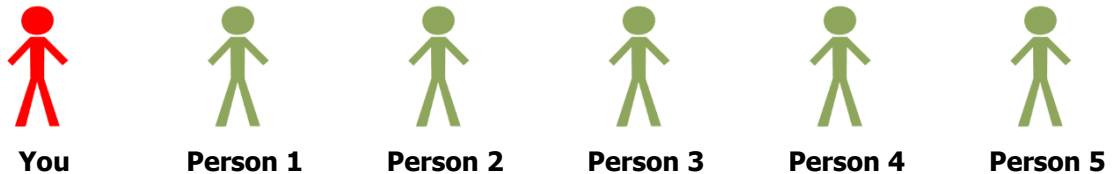

**You are in Health State A**

**The 5 other people are in Full Health.**

Would you prefer Situation 1 or Situation 2?

Situation 1

Situation 2

*[If respondent answered "no" to the first part of question 7 in Section 1 (i.e. if they have no dependent children), skip Q10 and go straight to Q11]*

10. This is another hypothetical question. It concerns the health of your child, and that of five other children who you do not know. (If you have more than one child, think of your youngest child). You do not know anything about the five other children, except that they live somewhere in the UK, and are the same age as your child. They are complete strangers to you.

Imagine two situations, which differ in terms of your child's health and the health of these five other children over the next week. Let's call these situations 1 and 2.

**Situation 1:** Your child is in Full Health; the 5 other children are suffering from Health State A (i.e. they have a fever, aching muscles, a headache, a dry chesty cough, a sore throat and tiredness).

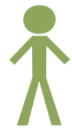

Your child

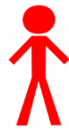

Child 1

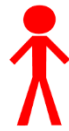

Child 2

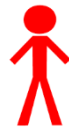

Child 3

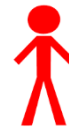

Child 4

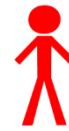

Child 5

**Your child is in Full Health**

**The 5 other children are in Health State A.**

**Situation 2:** Your child is suffering from Health State A (i.e. he/she has a fever, aching muscles, a headache, a dry chesty cough, a sore throat and tiredness); the 5 other children are in Full Health.

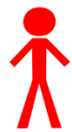

Your child

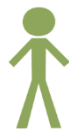

Child 1

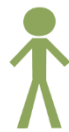

Child 2

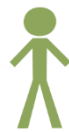

Child 3

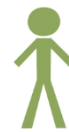

Child 4

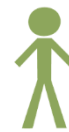

Child 5

**Your child is in Health State A**

**The 5 other children are in Full Health.**

Would you prefer Situation 1 or Situation 2?

Situation 1

Situation 2

The next question contains information about antibiotic resistance, a topic which you may have seen in the news recently.

11. Antibiotic resistance occurs when an antibiotic loses its ability to effectively control or kill growing bacteria. It is an increasingly serious threat to public health. Without effective antibiotics, many routine treatments will become increasingly dangerous. Setting broken bones, and even basic operations, rely on access to antibiotics that work. Antibiotic resistance is believed to be caused by unnecessary use of antibiotics, and inappropriate use, such as not taking them as prescribed, skipping doses, or saving them for later use.

(a) How surprising do you find this information?

Very surprising

Somewhat surprising

Not very surprising

Not at all surprising

(b) How will this information affect the number of times that you visit a doctor for conditions like Health State A? (**Health State A:** You have a fever, aching muscles, a headache, a dry chesty cough, a sore throat and tiredness).

Definitely visit more

Probably visit more

No change

Probably visit less

Definitely visit less

Don't know

(c) How will this information affect the likelihood of you asking a doctor for antibiotics?

Definitely ask more

Probably ask more

No change

Probably ask less

Definitely ask less

Don't know

[If respondent answered no to first part of question 7 in Section 1 (i.e. if they have no dependent children), go now to Section 3.]

Parts (d) and (e) are about the health of your child. If you have more than one child, think of your youngest child.

(d) How will this information affect the number of times that you take your child to visit a doctor for conditions like Health State A? (**Health State A:** He/she has a fever, aching muscles, a headache, a dry chesty cough, a sore throat and tiredness)

Definitely visit more

Probably visit more

No change

Probably visit less

Definitely visit less

Don't know

(e) How will this information affect the likelihood of you asking a doctor for antibiotics for your child?

Definitely ask more

Probably ask more

No change

Probably ask less

Definitely ask less

Don't know

### Section 3

There is some evidence that personality traits are related to certain health attitudes, behaviours and outcomes. To help us to learn more about this, we would like to conclude the questionnaire by asking you some questions about how you see yourself.

How well do the following statements describe your personality?

(a) "I see myself as someone who is reserved."

*Agree strongly*

*Agree a little*

*Neither agree nor disagree*

*Disagree a little*

*Disagree strongly*

(b) "I see myself as someone who is generally trusting."

*Agree strongly*

*Agree a little*

*Neither agree nor disagree*



*Disagree a little*

*Disagree strongly*

(c) "I see myself as someone who tends to be lazy."

*Agree strongly*

*Agree a little*

*Neither agree nor disagree*

*Disagree a little*

*Disagree strongly*

(d) "I see myself as someone who is relaxed, handles stress well."

*Agree strongly*

*Agree a little*

*Neither agree nor disagree*

*Disagree a little*

*Disagree strongly*

(e) "I see myself as someone who has few artistic interests."

*Agree strongly*

*Agree a little*

*Neither agree nor disagree*

*Disagree a little*

*Disagree strongly*

(f) "I see myself as someone who is outgoing, sociable."

*Agree strongly*

*Agree a little*

*Neither agree nor disagree*

*Disagree a little*

*Disagree strongly*

(g) "I see myself as someone who tends to find fault with others."

*Agree strongly*

*Agree a little*

*Neither agree nor disagree*

*Disagree a little*

*Disagree strongly*

(h) "I see myself as someone who does a thorough job."

*Agree strongly*

*Agree a little*

*Neither agree nor disagree*

*Disagree a little*

*Disagree strongly*

(i) "I see myself as someone who gets nervous easily."

*Agree strongly*

*Agree a little*

*Neither agree nor disagree*

*Disagree a little*

*Disagree strongly*

(j) "I see myself as someone who has an active imagination."

*Agree strongly*

*Agree a little*

*Neither agree nor disagree*

*Disagree a little*

*Disagree strongly*

You have now reached the end of the questionnaire. Thank you very much for taking the time to complete it. The information you have provided will be extremely useful for our research. We would like to remind you that all the information you have given will be anonymised and treated in strict confidence.

## A questionnaire to better understand your views on different health conditions

Researchers and doctors at the University of Oxford are carrying out a survey of 4,000 adults in the United Kingdom to learn more about attitudes to some common health conditions, and to the use of antibiotics. We are very interested in learning more about your views. During the survey we will provide you with some information about how best to treat some common health conditions, and about antibiotics. We will then ask you some questions in response to this information.

Health can affect, and be affected by, many different aspects of life. The questionnaire also, therefore, asks a variety of questions about yourself – for example, your background, your income, and even your personality. Some of these questions may not seem to have obvious links to health, but it is important that we ask them, as your answers might help us to uncover some surprising and useful insights that could lead to improvements in healthcare.

The data you provide will be anonymised by Survey Sampling International (SSI) before sending it to researchers at the University of Oxford for academic research use. SSI will not share any of your personal data with the University of Oxford. The anonymised data will be stored on secure networks at the University of Oxford, and archived securely at the end of the project.

If you have any concerns arising from any of the health-related issues raised in the survey, please don't hesitate to ask to discuss them either with your GP or with another health care professional.

The questionnaire is divided into three sections. In total, it should take around 15 minutes to complete. Some of the questions may require a little thought, but please try to answer them all if you can. There are no right or wrong answers - we are simply interested in your views.

Participation in the survey is voluntary. If you do participate, you may withdraw without giving a reason and without penalty. You can withdraw at any time during the survey by simply closing your browser window. This study has been

reviewed by, and received ethics clearance through, the University of Oxford Central University Research Ethics Committee.

*What if there is a problem?*

If you have a concern about any aspect of this project, please speak to Dr. Laurence Roope (01865 617 913) [or Dr. Sarah Wordsworth (01865 289 268)] who will do their best to answer your query. The researcher should acknowledge your concern within 10 working days and give you an indication of how he/she intends to deal with it. If you remain unhappy or wish to make a formal complaint, please contact the chair of the Research Ethics Committee at the University of Oxford (Chair, Medical Sciences Inter-Divisional Research Ethics Committee; Email: [ethics@medsci.ox.ac.uk](mailto:ethics@medsci.ox.ac.uk); Address: Research Services, University of Oxford, Wellington Square, Oxford OX1 2JD). The chair will seek to resolve the matter in a reasonably expeditious manner.

If you would like to take the survey, and are over 18 years old, please click on the box below marked 'Yes'. If you no longer wish to take the survey, or are under 18 years old, please click on the box marked 'No'.

 Yes No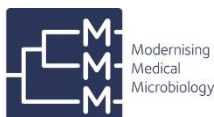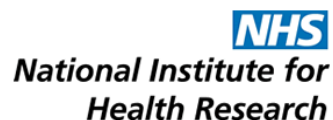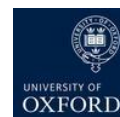

**This information is displayed at the start of the survey as a stand-alone webpage.**

Throughout the following questions, except where instructed otherwise, please indicate your answer by entering an 'X' in the one box which you feel best describes your answer. Certain questions will need to be answered in a slightly different way, such as by entering a number in a box. In these cases, the instructions will be clearly indicated in the question. Although we would like you to answer all questions, it is not compulsory to do so.

### Section 1

We would like to begin the questionnaire by asking you a few questions about yourself.

1. Are you

Male

Female

Prefer not to say

2. How old were you on your last birthday? *Please indicate your answer by entering a number in the box below:*

years

3. Which of the following apply to your current situation? *Please enter 'X' in the boxes beside all which apply.*

|                          |                              |
|--------------------------|------------------------------|
| <input type="checkbox"/> | Employed full-time           |
| <input type="checkbox"/> | Employed part-time           |
| <input type="checkbox"/> | Self-employed full-time      |
| <input type="checkbox"/> | Self-employed part-time      |
| <input type="checkbox"/> | Unemployed                   |
| <input type="checkbox"/> | Retired                      |
| <input type="checkbox"/> | Permanently sick or disabled |
| <input type="checkbox"/> | Looking after home or family |
| <input type="checkbox"/> | In full-time education       |
| <input type="checkbox"/> | Other                        |

4. What is the highest level of education or training you have attained?

|                                                                 |
|-----------------------------------------------------------------|
| GCSEs or 'O' Levels or CSEs or Scottish Standard Grade          |
| 'A' Levels or 'AS' Levels or Scottish Higher Grade              |
| International Baccalaureate                                     |
| Technical or Vocational Qualification                           |
| Transition Year Programme                                       |
| Higher Education Certificate or Diploma                         |
| Undergraduate Degree                                            |
| Professional Qualification (comparable to undergraduate degree) |
| Postgraduate Certificate or Diploma                             |
| Postgraduate Degree                                             |
| Doctorate                                                       |
| Other                                                           |
| None                                                            |

5. Are you currently married, in a civil partnership, or living with a partner?

Yes

No

6. Gross HOUSEHOLD income combines your income with that of your partner or any other household members with whom you share financial responsibilities BEFORE any taxes or deductions.

What is your gross annual household income?

|                    |
|--------------------|
| Up to £10,000      |
| £10,000 to £19,999 |
| £20,000 to £29,999 |
| £30,000 to £39,999 |
| £40,000 to £49,999 |
| £50,000 to £74,999 |
| £75,000 to £99,999 |
| £100,000 or more   |
| Prefer not to say  |



7a. Do you have any dependent children who live with you? (By 'dependent' children, we mean those who are not yet financially independent).

 Yes No

**[If no, go to question 8].**

7b. How many dependent children do you have who live with you? *Please indicate your answer by entering a number in the box below:*

7c. How old is your youngest dependent child who lives with you? \* *Please indicate your answer by entering a number in one of the boxes below. If your child is less than 2 years old, please answer in months; otherwise answer in years.*

 Years Months

**\* [If respondent indicates that they have only one dependent child who lives with them, amend text to "And how old is this child"?]**

8. Including yourself, how many adults live in your household? (This refers to *all* adults, including any children aged 18 or over, who live with you. Please also include any children aged 16 or 17 who live with you, if they are financially independent). *Please indicate your answer by entering a number in the box below:*

9. Were you born in the UK?

 Yes No

10. How would you describe your ethnicity or background?

|                                             |
|---------------------------------------------|
| White                                       |
| Mixed / multiple ethnic groups              |
| Black / African / Caribbean / Black British |
| Asian / Asian British                       |
| Other ethnic group                          |
| Prefer not to say                           |

11. What, if any, is your religion?

|                           |
|---------------------------|
| No religion               |
| Christianity (Protestant) |
| Christianity (Catholic)   |
| Christianity (Other)      |
| Islam                     |
| Hinduism                  |
| Sikhism                   |
| Judaism                   |
| Buddhism                  |
| Other religion            |
| Prefer not to say         |

12. Which of the following best describes where you live?

|                          |
|--------------------------|
| South East               |
| London                   |
| North West               |
| East of England          |
| West Midlands            |
| South West               |
| Yorkshire and the Humber |
| East Midlands            |
| North East               |
| Scotland                 |
| Wales                    |
| Northern Ireland         |

We would like to conclude this section by asking you a few questions about your lifestyle.

13. Do you smoke tobacco?

*Yes - every day*

*Yes - but not every day*

*No*

***[If respondent chooses one of the first two options, go to question 15].***

14. Have you ever smoked tobacco?

*Yes – I used to smoke every day*

*Yes – I used to smoke, but not every day*

*Yes – but I tried it only once or a few times*

*No*

15. Have you ever tried electronic cigarettes?

Yes

No

16. How often do you drink alcohol?

*Never*

*Less than once a month*

*1 to 3 times a month*

*Once or twice a week*

*Three or more times a week*

***[If respondent chooses "Never" go to Section 2]***

17. How often do you drink five or more alcoholic drinks on one occasion?

*Never*

*Less than once a month*

*1 to 3 times a month*

*Once or twice a week*

*Three or more times a week*

## Section 2

We would like to begin this section by asking you to imagine two health states, which we will call Health State A and Health State B.

**Health State A:** You have

- a temperature,
- aching muscles,
- a headache,
- a dry chesty cough,
- a sore throat,
- and you feel weak

**Health State B:** You have

- a temperature,
- chest pain,
- night sweats,
- a cough that brings up phlegm,
- loss of appetite (not wanting to eat),
- you feel drained,
- and you have lost some weight.

**[NOTE: Health State A and Health State B to remain on screen for all questions in which they are referred to]**

Drawn below is a scale, where the **best** health state you can imagine is marked **10** (we will call this 'Full Health'), and the **worst** health state you can imagine is marked **0**.

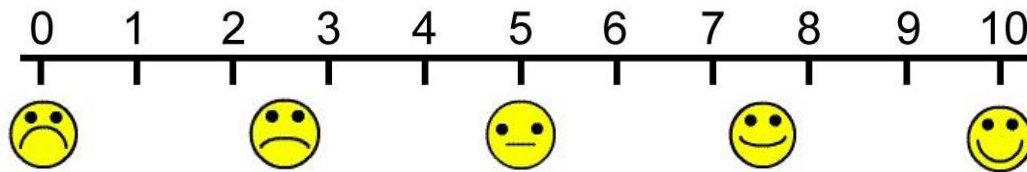

Worst imaginable  
health state

Best imaginable  
health state  
(Full Health)

1. How would you rate Health State A on this scale? *Please do so by writing a number between 0 and 10 in the box below.*

2. How would you rate Health State B on this scale? *Please do so by writing a number between 0 and 10 in the box below.*

3. How would you rate your own health today on this scale? *Please do this by writing a number between 0 and 10 in the box below.*

*[If the number given to answer Q1 is less than the number given to answer Q2, go to Q7].*

**Stand-alone page to be displayed between Q3 and Q4.**

The following questions are about the timing of different health states. You have told us that you regard Health State B as being worse than Health State A. However, some people might accept being in severely poor health at some point in the future, if it meant that they could avoid being in moderately poor health at the present time.

4. In this question, assume that if either Health State A or B occurs it will last for two weeks. Apart from those two weeks, you will be in Full Health.

(a) Which of the following options would you prefer?

Option 1: Health State A now (2016)

|                |             |             |             |             |             |             |             |             |             |
|----------------|-------------|-------------|-------------|-------------|-------------|-------------|-------------|-------------|-------------|
| Health State A | Full Health | Full Health | Full Health | Full Health | Full Health | Full Health | Full Health | Full Health | Full Health |
| 2016           | 2018        | 2020        | 2022        | 2024        | 2026        | 2028        | 2030        | 2032        | 2034        |

or

Option 2: Health State B in 10 years' time (2026)

|             |             |             |             |             |                |             |             |             |             |
|-------------|-------------|-------------|-------------|-------------|----------------|-------------|-------------|-------------|-------------|
| Full Health | Full Health | Full Health | Full Health | Full Health | Health State B | Full Health | Full Health | Full Health | Full Health |
| 2016        | 2018        | 2020        | 2022        | 2024        | 2026           | 2028        | 2030        | 2032        | 2034        |

**Option 1:** Health State A now (2016)

**Option 2:** Health State B in 10 years' time (2026)

***[If Option 2, go to part (f)]***

(b) Which of the following options would you prefer?

Option 1: Health State A now (2016)

|                |             |             |             |             |             |             |             |             |             |
|----------------|-------------|-------------|-------------|-------------|-------------|-------------|-------------|-------------|-------------|
| Health State A | Full Health | Full Health | Full Health | Full Health | Full Health | Full Health | Full Health | Full Health | Full Health |
| 2016           | 2018        | 2020        | 2022        | 2024        | 2026        | 2028        | 2030        | 2032        | 2034        |

or

Option 2: Health State B in 18 years' time (2034)

|             |             |             |             |             |             |             |             |             |                |
|-------------|-------------|-------------|-------------|-------------|-------------|-------------|-------------|-------------|----------------|
| Full Health | Full Health | Full Health | Full Health | Full Health | Full Health | Full Health | Full Health | Full Health | Health State B |
| 2016        | 2018        | 2020        | 2022        | 2024        | 2026        | 2028        | 2030        | 2032        | 2034           |

Option 1: Health State A now (2016)

Option 2: Health State B in 18 years' time (2034)

*[If Option 1, go to part (j)]*

(c) Which of the following options would you prefer?

Option 1: Health State A now (2016)

|                |             |             |             |             |             |             |             |             |             |
|----------------|-------------|-------------|-------------|-------------|-------------|-------------|-------------|-------------|-------------|
| Health State A | Full Health | Full Health | Full Health | Full Health | Full Health | Full Health | Full Health | Full Health | Full Health |
| 2016           | 2018        | 2020        | 2022        | 2024        | 2026        | 2028        | 2030        | 2032        | 2034        |

or

Option 2: Health State B in 14 years' time (2030)

|             |             |             |             |             |             |             |                |             |             |
|-------------|-------------|-------------|-------------|-------------|-------------|-------------|----------------|-------------|-------------|
| Full Health | Full Health | Full Health | Full Health | Full Health | Full Health | Full Health | Health State B | Full Health | Full Health |
| 2016        | 2018        | 2020        | 2022        | 2024        | 2026        | 2028        | 2030           | 2032        | 2034        |

Option 1: Health State A now (2016)

Option 2: Health State B in 14 years' time (2030)

**[If Option 2, go to part (e)]**

(d) Which of the following options would you prefer?

Option 1: Health State A now (2016)

|                |             |             |             |             |             |             |             |             |             |
|----------------|-------------|-------------|-------------|-------------|-------------|-------------|-------------|-------------|-------------|
| Health State A | Full Health | Full Health | Full Health | Full Health | Full Health | Full Health | Full Health | Full Health | Full Health |
| 2016           | 2018        | 2020        | 2022        | 2024        | 2026        | 2028        | 2030        | 2032        | 2034        |

or

Option 2: Health State B in 16 years' time (2032)

|             |             |             |             |             |             |             |             |                |             |
|-------------|-------------|-------------|-------------|-------------|-------------|-------------|-------------|----------------|-------------|
| Full Health | Full Health | Full Health | Full Health | Full Health | Full Health | Full Health | Full Health | Health State B | Full Health |
| 2016        | 2018        | 2020        | 2022        | 2024        | 2026        | 2028        | 2030        | 2032           | 2034        |

**Option 1:** Health State A now (2016)

**Option 2:** Health State B in 16 years' time (2032)

**[Now go to question 5]**

(e) Which of the following options would you prefer?

Option 1: Health State A now (2016)

|                |             |             |             |             |             |             |             |             |             |
|----------------|-------------|-------------|-------------|-------------|-------------|-------------|-------------|-------------|-------------|
| Health State A | Full Health | Full Health | Full Health | Full Health | Full Health | Full Health | Full Health | Full Health | Full Health |
| 2016           | 2018        | 2020        | 2022        | 2024        | 2026        | 2028        | 2030        | 2032        | 2034        |

or

Option 2: Health State B in 12 years' time (2028)

|             |             |             |             |             |             |                |             |             |             |
|-------------|-------------|-------------|-------------|-------------|-------------|----------------|-------------|-------------|-------------|
| Full Health | Full Health | Full Health | Full Health | Full Health | Full Health | Health State B | Full Health | Full Health | Full Health |
| 2016        | 2018        | 2020        | 2022        | 2024        | 2026        | 2028           | 2030        | 2032        | 2034        |

**Option 1:** Health State A now (2016)

**Option 2:** Health State B in 12 years' time (2028)



**[Now go to question 5]**

(f) Which of the following options would you prefer?

Option 1: Health State A now (2016)

|                |             |             |             |             |             |             |             |             |             |
|----------------|-------------|-------------|-------------|-------------|-------------|-------------|-------------|-------------|-------------|
| Health State A | Full Health | Full Health | Full Health | Full Health | Full Health | Full Health | Full Health | Full Health | Full Health |
| 2016           | 2018        | 2020        | 2022        | 2024        | 2026        | 2028        | 2030        | 2032        | 2034        |

or

Option 2: Health State B in 2 years' time (2018)

|             |                |             |             |             |             |             |             |             |             |
|-------------|----------------|-------------|-------------|-------------|-------------|-------------|-------------|-------------|-------------|
| Full Health | Health State B | Full Health | Full Health | Full Health | Full Health | Full Health | Full Health | Full Health | Full Health |
| 2016        | 2018           | 2020        | 2022        | 2024        | 2026        | 2028        | 2030        | 2032        | 2034        |

**Option 1:** Health State A now (2016)

**Option 2:** Health State B in 2 years' time (2018)

**[If Option 2, go to question 5]**

(g) Which of the following options would you prefer?

Option 1: Health State A now (2016)

|                |             |             |             |             |             |             |             |             |             |
|----------------|-------------|-------------|-------------|-------------|-------------|-------------|-------------|-------------|-------------|
| Health State A | Full Health | Full Health | Full Health | Full Health | Full Health | Full Health | Full Health | Full Health | Full Health |
| 2016           | 2018        | 2020        | 2022        | 2024        | 2026        | 2028        | 2030        | 2032        | 2034        |

or

Option 2: Health State B in 6 years' time (2022)

|             |             |             |                |             |             |             |             |             |             |
|-------------|-------------|-------------|----------------|-------------|-------------|-------------|-------------|-------------|-------------|
| Full Health | Full Health | Full Health | Health State B | Full Health | Full Health | Full Health | Full Health | Full Health | Full Health |
| 2016        | 2018        | 2020        | 2022           | 2024        | 2026        | 2028        | 2030        | 2032        | 2034        |

**Option 1:** Health State A now (2016)

**Option 2:** Health State B in 6 years' time (2022)

**[If Option 1, go to part (i)]**

(h) Which of the following options would you prefer?

Option 1: Health State A now (2016)

|                |             |             |             |             |             |             |             |             |             |
|----------------|-------------|-------------|-------------|-------------|-------------|-------------|-------------|-------------|-------------|
| Health State A | Full Health | Full Health | Full Health | Full Health | Full Health | Full Health | Full Health | Full Health | Full Health |
| 2016           | 2018        | 2020        | 2022        | 2024        | 2026        | 2028        | 2030        | 2032        | 2034        |

or

Option 2: Health State B in 4 years' time (2020)

|             |             |                |             |             |             |             |             |             |             |
|-------------|-------------|----------------|-------------|-------------|-------------|-------------|-------------|-------------|-------------|
| Full Health | Full Health | Health State B | Full Health | Full Health | Full Health | Full Health | Full Health | Full Health | Full Health |
| 2016        | 2018        | 2020           | 2022        | 2024        | 2026        | 2028        | 2030        | 2032        | 2034        |

**Option 1:** Health State A now (2016)

**Option 2:** Health State B in 4 years' time (2020)

**[Now go to question 5]**

(i) Which of the following options would you prefer?

Option 1: Health State A now (2016)

|                |             |             |             |             |             |             |             |             |             |
|----------------|-------------|-------------|-------------|-------------|-------------|-------------|-------------|-------------|-------------|
| Health State A | Full Health | Full Health | Full Health | Full Health | Full Health | Full Health | Full Health | Full Health | Full Health |
| 2016           | 2018        | 2020        | 2022        | 2024        | 2026        | 2028        | 2030        | 2032        | 2034        |

or

Option 2: Health State B in 8 years' time (2024)

|             |             |             |             |                |             |             |             |             |             |
|-------------|-------------|-------------|-------------|----------------|-------------|-------------|-------------|-------------|-------------|
| Full Health | Full Health | Full Health | Full Health | Health State B | Full Health | Full Health | Full Health | Full Health | Full Health |
| 2016        | 2018        | 2020        | 2022        | 2024           | 2026        | 2028        | 2030        | 2032        | 2034        |

**Option 1:** Health State A now (2016)

**Option 2:** Health State B in 8 years' time (2024)

**[Now go to question 5]**

(j) Is there any far off time in the future at which being in Health State B would be preferable to being in Health State A today?

Please indicate your answer by writing a number in the box below. (If you would never prefer Health State B at any point in the future, to Health State A today, please write the letter "N" in the box below, instead of a number).

"Rather than Health State A today, I would prefer Health State B, providing it were at least

years from now."

**[If "N", go to Q6.]**

5. In this question, again assume that if either Health State A or B occurs it will last for two weeks. Apart from those two weeks, you will be in Full Health.

(a) Which of the following options would you prefer?

Option 1: Health State A in 2 years' time (2018)

|             |                |             |             |             |             |             |             |             |             |             |
|-------------|----------------|-------------|-------------|-------------|-------------|-------------|-------------|-------------|-------------|-------------|
| Full Health | Health State A | Full Health | Full Health | Full Health | Full Health | Full Health | Full Health | Full Health | Full Health | Full Health |
| 2016        | 2018           | 2020        | 2022        | 2024        | 2026        | 2028        | 2030        | 2032        | 2034        | 2036        |

or

Option 2: Health State B in 12 years' time (2028)

|             |             |             |             |             |             |                |             |             |             |             |
|-------------|-------------|-------------|-------------|-------------|-------------|----------------|-------------|-------------|-------------|-------------|
| Full Health | Full Health | Full Health | Full Health | Full Health | Full Health | Health State B | Full Health | Full Health | Full Health | Full Health |
| 2016        | 2018        | 2020        | 2022        | 2024        | 2026        | 2028           | 2030        | 2032        | 2034        | 2036        |

**Option 1:** Health State A in 2 years' time (2018)

**Option 2:** Health State B in 12 years' time (2028)

**[If Option 2, go to part (f)]**

(b) Which of the following options would you prefer?

Option 1: Health State A in 2 years' time (2018)

|             |                |             |             |             |             |             |             |             |             |             |
|-------------|----------------|-------------|-------------|-------------|-------------|-------------|-------------|-------------|-------------|-------------|
| Full Health | Health State A | Full Health | Full Health | Full Health | Full Health | Full Health | Full Health | Full Health | Full Health | Full Health |
| 2016        | 2018           | 2020        | 2022        | 2024        | 2026        | 2028        | 2030        | 2032        | 2034        | 2036        |

or

Option 2: Health State B in 20 years' time (2036)

|             |             |             |             |             |             |             |             |             |             |                |
|-------------|-------------|-------------|-------------|-------------|-------------|-------------|-------------|-------------|-------------|----------------|
| Full Health | Full Health | Full Health | Full Health | Full Health | Full Health | Full Health | Full Health | Full Health | Full Health | Health State B |
| 2016        | 2018        | 2020        | 2022        | 2024        | 2026        | 2028        | 2030        | 2032        | 2034        | 2036           |

**Option 1:** Health State A in 2 years' time (2018)

**Option 2:** Health State B in 20 years' time (2036)

**[If Option 1, go to part (j)]**

(c) Which of the following options would you prefer?

Option 1: Health State A in 2 years' time (2018)

|             |                |             |             |             |             |             |             |             |             |             |
|-------------|----------------|-------------|-------------|-------------|-------------|-------------|-------------|-------------|-------------|-------------|
| Full Health | Health State A | Full Health | Full Health | Full Health | Full Health | Full Health | Full Health | Full Health | Full Health | Full Health |
| 2016        | 2018           | 2020        | 2022        | 2024        | 2026        | 2028        | 2030        | 2032        | 2034        | 2036        |

or

Option 2: Health State B in 16 years' time (2032)

|             |             |             |             |             |             |             |             |                |             |             |
|-------------|-------------|-------------|-------------|-------------|-------------|-------------|-------------|----------------|-------------|-------------|
| Full Health | Full Health | Full Health | Full Health | Full Health | Full Health | Full Health | Full Health | Health State B | Full Health | Full Health |
| 2016        | 2018        | 2020        | 2022        | 2024        | 2026        | 2028        | 2030        | 2032           | 2034        | 2036        |

**Option 1:** Health State A in 2 years' time (2018)

**Option 2:** Health State B in 16 years' time (2032)

**[If Option 2, go to part (e)]**

(d) Which of the following options would you prefer?

Option 1: Health State A in 2 years' time (2018)

|             |                |             |             |             |             |             |             |             |             |             |
|-------------|----------------|-------------|-------------|-------------|-------------|-------------|-------------|-------------|-------------|-------------|
| Full Health | Health State A | Full Health | Full Health | Full Health | Full Health | Full Health | Full Health | Full Health | Full Health | Full Health |
| 2016        | 2018           | 2020        | 2022        | 2024        | 2026        | 2028        | 2030        | 2032        | 2034        | 2036        |

or

Option 2: Health State B in 18 years' time (2034)

|             |             |             |             |             |             |             |             |             |                |             |
|-------------|-------------|-------------|-------------|-------------|-------------|-------------|-------------|-------------|----------------|-------------|
| Full Health | Full Health | Full Health | Full Health | Full Health | Full Health | Full Health | Full Health | Full Health | Health State B | Full Health |
| 2016        | 2018        | 2020        | 2022        | 2024        | 2026        | 2028        | 2030        | 2032        | 2034           | 2036        |

**Option 1:** Health State A in 2 years' time (2018)

**Option 2:** Health State B in 18 years' time (2034)

**[Now go to question 6]**

(e) Which of the following options would you prefer?

Option 1: Health State A in 2 years' time (2018)

|             |                |             |             |             |             |             |             |             |             |             |
|-------------|----------------|-------------|-------------|-------------|-------------|-------------|-------------|-------------|-------------|-------------|
| Full Health | Health State A | Full Health | Full Health | Full Health | Full Health | Full Health | Full Health | Full Health | Full Health | Full Health |
| 2016        | 2018           | 2020        | 2022        | 2024        | 2026        | 2028        | 2030        | 2032        | 2034        | 2036        |

or

Option 2: Health State B in 14 years' time (2030)

|             |             |             |             |             |             |             |                |             |             |             |
|-------------|-------------|-------------|-------------|-------------|-------------|-------------|----------------|-------------|-------------|-------------|
| Full Health | Full Health | Full Health | Full Health | Full Health | Full Health | Full Health | Health State B | Full Health | Full Health | Full Health |
| 2016        | 2018        | 2020        | 2022        | 2024        | 2026        | 2028        | 2030           | 2032        | 2034        | 2036        |

**Option 1:** Health State A in 2 years' time (2018)

**Option 2:** Health State B in 14 years' time (2030)

**[Now go to question 6]**

(f) Which of the following options would you prefer?

Option 1: Health State A in 2 years' time (2018)

|             |                |             |             |             |             |             |             |             |             |             |
|-------------|----------------|-------------|-------------|-------------|-------------|-------------|-------------|-------------|-------------|-------------|
| Full Health | Health State A | Full Health | Full Health | Full Health | Full Health | Full Health | Full Health | Full Health | Full Health | Full Health |
| 2016        | 2018           | 2020        | 2022        | 2024        | 2026        | 2028        | 2030        | 2032        | 2034        | 2036        |

or

Option 2: Health State B in 4 years' time (2020)

|             |             |                |             |             |             |             |             |             |             |             |
|-------------|-------------|----------------|-------------|-------------|-------------|-------------|-------------|-------------|-------------|-------------|
| Full Health | Full Health | Health State B | Full Health | Full Health | Full Health | Full Health | Full Health | Full Health | Full Health | Full Health |
| 2016        | 2018        | 2020           | 2022        | 2024        | 2026        | 2028        | 2030        | 2032        | 2034        | 2036        |

**Option 1:** Health State A in 2 years' time (2018)

**Option 2:** Health State B in 4 years' time (2020)

**[If Option 2, go to question 6]**

(g) Which of the following options would you prefer?

Option 1: Health State A in 2 years' time (2018)

|             |                |             |             |             |             |             |             |             |             |             |
|-------------|----------------|-------------|-------------|-------------|-------------|-------------|-------------|-------------|-------------|-------------|
| Full Health | Health State A | Full Health | Full Health | Full Health | Full Health | Full Health | Full Health | Full Health | Full Health | Full Health |
| 2016        | 2018           | 2020        | 2022        | 2024        | 2026        | 2028        | 2030        | 2032        | 2034        | 2036        |

or

Option 2: Health State B in 8 years' time (2024)

|             |             |             |             |                |             |             |             |             |             |             |
|-------------|-------------|-------------|-------------|----------------|-------------|-------------|-------------|-------------|-------------|-------------|
| Full Health | Full Health | Full Health | Full Health | Health State B | Full Health | Full Health | Full Health | Full Health | Full Health | Full Health |
| 2016        | 2018        | 2020        | 2022        | 2024           | 2026        | 2028        | 2030        | 2032        | 2034        | 2036        |

**Option 1:** Health State A in 2 years' time (2018)

**Option 2:** Health State B in 8 years' time (2024)

**[If Option 1, go to part (i)]**

(h) Which of the following options would you prefer?

Option 1: Health State A in 2 years' time (2018)

|             |                |             |             |             |             |             |             |             |             |             |
|-------------|----------------|-------------|-------------|-------------|-------------|-------------|-------------|-------------|-------------|-------------|
| Full Health | Health State A | Full Health | Full Health | Full Health | Full Health | Full Health | Full Health | Full Health | Full Health | Full Health |
| 2016        | 2018           | 2020        | 2022        | 2024        | 2026        | 2028        | 2030        | 2032        | 2034        | 2036        |

or

Option 2: Health State B in 6 years' time (2022)

|             |             |             |                |             |             |             |             |             |             |             |
|-------------|-------------|-------------|----------------|-------------|-------------|-------------|-------------|-------------|-------------|-------------|
| Full Health | Full Health | Full Health | Health State B | Full Health | Full Health | Full Health | Full Health | Full Health | Full Health | Full Health |
| 2016        | 2018        | 2020        | 2022           | 2024        | 2026        | 2028        | 2030        | 2032        | 2034        | 2036        |

**Option 1:** Health State A in 2 years' time (2018)

**Option 2:** Health State B in 6 years' time (2022)

**[Now go to question 6]**

(i) Which of the following options would you prefer?

Option 1: Health State A in 2 years' time (2018)

|             |                |             |             |             |             |             |             |             |             |             |
|-------------|----------------|-------------|-------------|-------------|-------------|-------------|-------------|-------------|-------------|-------------|
| Full Health | Health State A | Full Health | Full Health | Full Health | Full Health | Full Health | Full Health | Full Health | Full Health | Full Health |
| 2016        | 2018           | 2020        | 2022        | 2024        | 2026        | 2028        | 2030        | 2032        | 2034        | 2036        |

or

Option 2: Health State B in 10 years' time (2026)

|             |             |             |             |             |                |             |             |             |             |             |
|-------------|-------------|-------------|-------------|-------------|----------------|-------------|-------------|-------------|-------------|-------------|
| Full Health | Full Health | Full Health | Full Health | Full Health | Health State B | Full Health | Full Health | Full Health | Full Health | Full Health |
| 2016        | 2018        | 2020        | 2022        | 2024        | 2026           | 2028        | 2030        | 2032        | 2034        | 2036        |

**Option 1:** Health State A in 2 years' time (2018)

**Option 2:** Health State B in 10 years' time (2026)

**[Now go to question 6]**

(j) Is there any far off time in the future at which being in Health State B would be preferable to being in Health State A two years from now (ie. in 2018)?

*Please indicate your answer by writing a number in the box below. (If you would never prefer Health State B at any point in the future, to Health State A two years from now, please write the letter "N" in the box below, instead of a number).*

*"Rather than Health State A two years' from now, I would prefer Health State B, providing it were at least  years from now."*

*Randomised into two versions:*

6: VERSION 1: This question is about views on risks to health. You have two options, 1 and 2. The options vary in terms of your health state over the next two weeks.

In option 1, there is a chance of being in Full Health, but also a chance of being in Health State B. So option 1 is like a lottery: you might be in Full Health, but you may also be in Health State B. *You do not know beforehand which of these health states you will experience: Full Health or Health State B.*

In option 2, you will definitely be in Health State A.

In the following questions, we will vary the chance of Full Health in Option 1 and, in each case, ask you to say whether you prefer Option 1 or Option 2 by marking an 'X' in the appropriate box.



(a) Which option do you prefer:

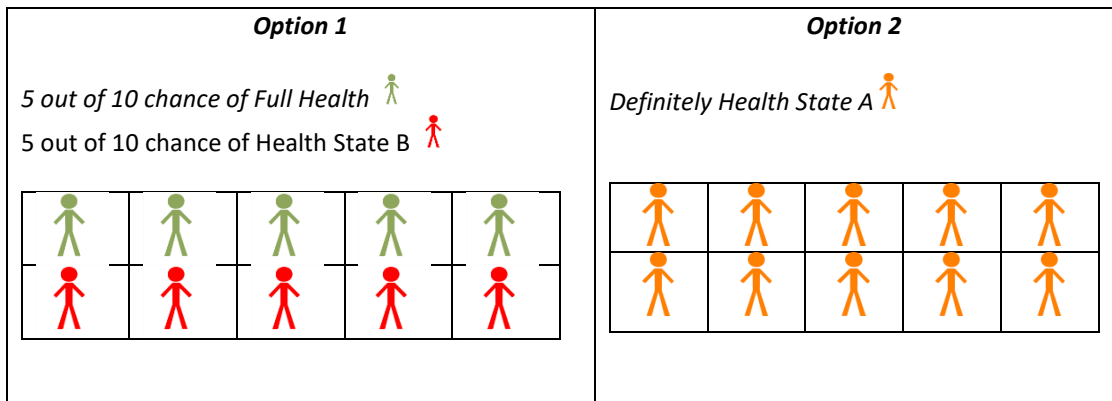

Option 1: 5 out of 10 chance of Full Health, and 5 out of 10 chance of Health State B

or

Option 2: Definitely Health State A

*[If Option 2, go to part (f)]*

(b) Which option do you prefer:

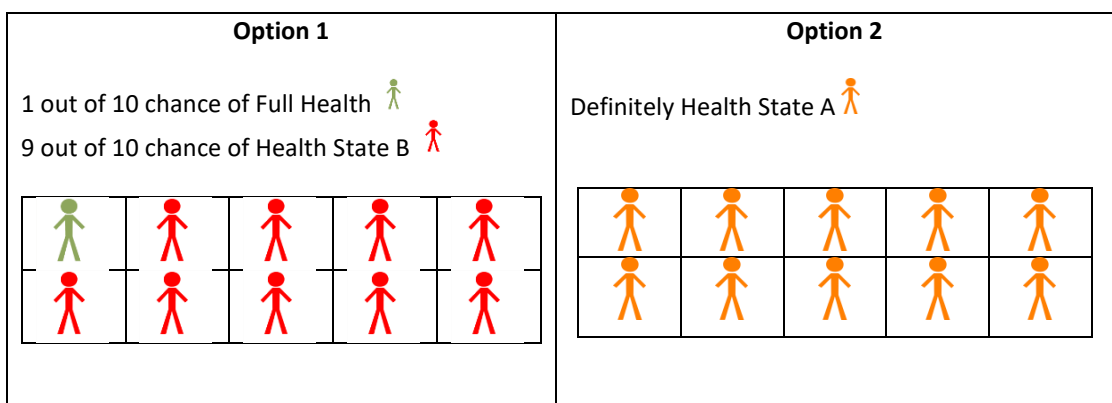

Option 1: 1 out of 10 chance of Full Health, and 9 out of 10 chance of Health State B

or

Option 2: Definitely Health State A

**[If Option 1, go to question 6.5]**

(c) Which option do you prefer:

| Option 1                                                                                                                                                                                                                                                                                                                                                                                                                                                                                                                                                                                                                                                                                                                                                                                                                                                                                                                                                                         | Option 2                                                                                                      |                                                                                     |                                                                                     |                                                                                     |                                                                                   |                                                                                   |                                                                                   |                                                                                   |                                                                                   |                                                                                   |                                                                                                                                                                                                                                                                                                                                                                                                                                                                                                                                                                                                                                                                                                                                                                                                                                                                                                                                                                                                |                                                                                   |                                                                                    |                                                                                     |                                                                                     |                                                                                     |                                                                                   |                                                                                    |                                                                                     |                                                                                     |                                                                                     |
|----------------------------------------------------------------------------------------------------------------------------------------------------------------------------------------------------------------------------------------------------------------------------------------------------------------------------------------------------------------------------------------------------------------------------------------------------------------------------------------------------------------------------------------------------------------------------------------------------------------------------------------------------------------------------------------------------------------------------------------------------------------------------------------------------------------------------------------------------------------------------------------------------------------------------------------------------------------------------------|---------------------------------------------------------------------------------------------------------------|-------------------------------------------------------------------------------------|-------------------------------------------------------------------------------------|-------------------------------------------------------------------------------------|-----------------------------------------------------------------------------------|-----------------------------------------------------------------------------------|-----------------------------------------------------------------------------------|-----------------------------------------------------------------------------------|-----------------------------------------------------------------------------------|-----------------------------------------------------------------------------------|------------------------------------------------------------------------------------------------------------------------------------------------------------------------------------------------------------------------------------------------------------------------------------------------------------------------------------------------------------------------------------------------------------------------------------------------------------------------------------------------------------------------------------------------------------------------------------------------------------------------------------------------------------------------------------------------------------------------------------------------------------------------------------------------------------------------------------------------------------------------------------------------------------------------------------------------------------------------------------------------|-----------------------------------------------------------------------------------|------------------------------------------------------------------------------------|-------------------------------------------------------------------------------------|-------------------------------------------------------------------------------------|-------------------------------------------------------------------------------------|-----------------------------------------------------------------------------------|------------------------------------------------------------------------------------|-------------------------------------------------------------------------------------|-------------------------------------------------------------------------------------|-------------------------------------------------------------------------------------|
| 3 out of 10 chance of Full Health <br>7 out of 10 chance of Health State B                                                                                                                                                                                                                                                                                                                                                                                                                                                                                                                                                                                                                                                                                                                                     | Definitely Health State A  |                                                                                     |                                                                                     |                                                                                     |                                                                                   |                                                                                   |                                                                                   |                                                                                   |                                                                                   |                                                                                   |                                                                                                                                                                                                                                                                                                                                                                                                                                                                                                                                                                                                                                                                                                                                                                                                                                                                                                                                                                                                |                                                                                   |                                                                                    |                                                                                     |                                                                                     |                                                                                     |                                                                                   |                                                                                    |                                                                                     |                                                                                     |                                                                                     |
| <table border="1"><tr><td></td><td></td><td></td><td></td><td></td></tr><tr><td></td><td></td><td></td><td></td><td></td></tr></table> |                              |    |    |    |  |  |  |  |  |  | <table border="1"><tr><td></td><td></td><td></td><td></td><td></td></tr><tr><td></td><td></td><td></td><td></td><td></td></tr></table> |  |  |  |  |  |  |  |  |  |  |
|                                                                                                                                                                                                                                                                                                                                                                                                                                                                                                                                                                                                                                                                                                                                                                                                                                                                                                 |                              |    |    |    |                                                                                   |                                                                                   |                                                                                   |                                                                                   |                                                                                   |                                                                                   |                                                                                                                                                                                                                                                                                                                                                                                                                                                                                                                                                                                                                                                                                                                                                                                                                                                                                                                                                                                                |                                                                                   |                                                                                    |                                                                                     |                                                                                     |                                                                                     |                                                                                   |                                                                                    |                                                                                     |                                                                                     |                                                                                     |
|                                                                                                                                                                                                                                                                                                                                                                                                                                                                                                                                                                                                                                                                                                                                                                                                                                                                                                 |                              |    |    |    |                                                                                   |                                                                                   |                                                                                   |                                                                                   |                                                                                   |                                                                                   |                                                                                                                                                                                                                                                                                                                                                                                                                                                                                                                                                                                                                                                                                                                                                                                                                                                                                                                                                                                                |                                                                                   |                                                                                    |                                                                                     |                                                                                     |                                                                                     |                                                                                   |                                                                                    |                                                                                     |                                                                                     |                                                                                     |
|                                                                                                                                                                                                                                                                                                                                                                                                                                                                                                                                                                                                                                                                                                                                                                                                                                                                                                 |                             |  |  |  |                                                                                   |                                                                                   |                                                                                   |                                                                                   |                                                                                   |                                                                                   |                                                                                                                                                                                                                                                                                                                                                                                                                                                                                                                                                                                                                                                                                                                                                                                                                                                                                                                                                                                                |                                                                                   |                                                                                    |                                                                                     |                                                                                     |                                                                                     |                                                                                   |                                                                                    |                                                                                     |                                                                                     |                                                                                     |
|                                                                                                                                                                                                                                                                                                                                                                                                                                                                                                                                                                                                                                                                                                                                                                                                                                                                                                 |                             |  |  |  |                                                                                   |                                                                                   |                                                                                   |                                                                                   |                                                                                   |                                                                                   |                                                                                                                                                                                                                                                                                                                                                                                                                                                                                                                                                                                                                                                                                                                                                                                                                                                                                                                                                                                                |                                                                                   |                                                                                    |                                                                                     |                                                                                     |                                                                                     |                                                                                   |                                                                                    |                                                                                     |                                                                                     |                                                                                     |

**Option 1: 3 out of 10 chance of Full Health, and 7 out of 10 chance of Health State B**

or

**Option 2: Definitely Health State A**

**[If Option 2, go to part (e)]**

(d) Which option do you prefer:

| Option 1                                                                                                                                                                                                                                                                                                                                                                                                                                                                                                                                                                                                                                                                                                                                                                                                                                                                                                                                                                                             | Option 2                                                                                                        |                                                                                       |                                                                                       |                                                                                       |                                                                                     |                                                                                     |                                                                                     |                                                                                     |                                                                                     |                                                                                     |                                                                                                                                                                                                                                                                                                                                                                                                                                                                                                                                                                                                                                                                                                                                                                                                                                                                                                                                                                                                                    |                                                                                     |                                                                                      |                                                                                       |                                                                                       |                                                                                       |                                                                                     |                                                                                      |                                                                                       |                                                                                       |                                                                                       |
|------------------------------------------------------------------------------------------------------------------------------------------------------------------------------------------------------------------------------------------------------------------------------------------------------------------------------------------------------------------------------------------------------------------------------------------------------------------------------------------------------------------------------------------------------------------------------------------------------------------------------------------------------------------------------------------------------------------------------------------------------------------------------------------------------------------------------------------------------------------------------------------------------------------------------------------------------------------------------------------------------|-----------------------------------------------------------------------------------------------------------------|---------------------------------------------------------------------------------------|---------------------------------------------------------------------------------------|---------------------------------------------------------------------------------------|-------------------------------------------------------------------------------------|-------------------------------------------------------------------------------------|-------------------------------------------------------------------------------------|-------------------------------------------------------------------------------------|-------------------------------------------------------------------------------------|-------------------------------------------------------------------------------------|--------------------------------------------------------------------------------------------------------------------------------------------------------------------------------------------------------------------------------------------------------------------------------------------------------------------------------------------------------------------------------------------------------------------------------------------------------------------------------------------------------------------------------------------------------------------------------------------------------------------------------------------------------------------------------------------------------------------------------------------------------------------------------------------------------------------------------------------------------------------------------------------------------------------------------------------------------------------------------------------------------------------|-------------------------------------------------------------------------------------|--------------------------------------------------------------------------------------|---------------------------------------------------------------------------------------|---------------------------------------------------------------------------------------|---------------------------------------------------------------------------------------|-------------------------------------------------------------------------------------|--------------------------------------------------------------------------------------|---------------------------------------------------------------------------------------|---------------------------------------------------------------------------------------|---------------------------------------------------------------------------------------|
| 2 out of 10 chance of Full Health <br>8 out of 10 chance of Health State B                                                                                                                                                                                                                                                                                                                                                                                                                                                                                                                                                                                                                                                                                                                                                     | Definitely Health State A  |                                                                                       |                                                                                       |                                                                                       |                                                                                     |                                                                                     |                                                                                     |                                                                                     |                                                                                     |                                                                                     |                                                                                                                                                                                                                                                                                                                                                                                                                                                                                                                                                                                                                                                                                                                                                                                                                                                                                                                                                                                                                    |                                                                                     |                                                                                      |                                                                                       |                                                                                       |                                                                                       |                                                                                     |                                                                                      |                                                                                       |                                                                                       |                                                                                       |
| <table border="1"><tr><td></td><td></td><td></td><td></td><td></td></tr><tr><td></td><td></td><td></td><td></td><td></td></tr></table> |                              |    |    |    |  |  |  |  |  |  | <table border="1"><tr><td></td><td></td><td></td><td></td><td></td></tr><tr><td></td><td></td><td></td><td></td><td></td></tr></table> |  |  |  |  |  |  |  |  |  |  |
|                                                                                                                                                                                                                                                                                                                                                                                                                                                                                                                                                                                                                                                                                                                                                                                                                                                                                                                   |                              |    |    |    |                                                                                     |                                                                                     |                                                                                     |                                                                                     |                                                                                     |                                                                                     |                                                                                                                                                                                                                                                                                                                                                                                                                                                                                                                                                                                                                                                                                                                                                                                                                                                                                                                                                                                                                    |                                                                                     |                                                                                      |                                                                                       |                                                                                       |                                                                                       |                                                                                     |                                                                                      |                                                                                       |                                                                                       |                                                                                       |
|                                                                                                                                                                                                                                                                                                                                                                                                                                                                                                                                                                                                                                                                                                                                                                                                                                                                                                                   |                              |    |    |    |                                                                                     |                                                                                     |                                                                                     |                                                                                     |                                                                                     |                                                                                     |                                                                                                                                                                                                                                                                                                                                                                                                                                                                                                                                                                                                                                                                                                                                                                                                                                                                                                                                                                                                                    |                                                                                     |                                                                                      |                                                                                       |                                                                                       |                                                                                       |                                                                                     |                                                                                      |                                                                                       |                                                                                       |                                                                                       |
|                                                                                                                                                                                                                                                                                                                                                                                                                                                                                                                                                                                                                                                                                                                                                                                                                                                                                                                   |                             |  |  |  |                                                                                     |                                                                                     |                                                                                     |                                                                                     |                                                                                     |                                                                                     |                                                                                                                                                                                                                                                                                                                                                                                                                                                                                                                                                                                                                                                                                                                                                                                                                                                                                                                                                                                                                    |                                                                                     |                                                                                      |                                                                                       |                                                                                       |                                                                                       |                                                                                     |                                                                                      |                                                                                       |                                                                                       |                                                                                       |
|                                                                                                                                                                                                                                                                                                                                                                                                                                                                                                                                                                                                                                                                                                                                                                                                                                                                                                                   |                             |  |  |  |                                                                                     |                                                                                     |                                                                                     |                                                                                     |                                                                                     |                                                                                     |                                                                                                                                                                                                                                                                                                                                                                                                                                                                                                                                                                                                                                                                                                                                                                                                                                                                                                                                                                                                                    |                                                                                     |                                                                                      |                                                                                       |                                                                                       |                                                                                       |                                                                                     |                                                                                      |                                                                                       |                                                                                       |                                                                                       |

**Option 1: 2 out of 10 chance of Full Health, and 8 out of 10 chance of Health State B**

or

**Option 2: Definitely Health State A**

[Now go to question 6.5]

(e) Which option do you prefer:

| Option 1                                                                                                                                                                                                                                                                                                                                                                                                                                                                                                                                                                                                                                                                                                                                                                                                                                                                                                                                                                                        | Option 2                                                                                                      |                                                                                     |                                                                                     |                                                                                     |                                                                                   |                                                                                   |                                                                                   |                                                                                   |                                                                                   |                                                                                   |                                                                                                                                                                                                                                                                                                                                                                                                                                                                                                                                                                                                                                                                                                                                                                                                                                                                                                                                                                                                               |                                                                                   |                                                                                    |                                                                                     |                                                                                     |                                                                                     |                                                                                   |                                                                                    |                                                                                     |                                                                                     |                                                                                     |
|-------------------------------------------------------------------------------------------------------------------------------------------------------------------------------------------------------------------------------------------------------------------------------------------------------------------------------------------------------------------------------------------------------------------------------------------------------------------------------------------------------------------------------------------------------------------------------------------------------------------------------------------------------------------------------------------------------------------------------------------------------------------------------------------------------------------------------------------------------------------------------------------------------------------------------------------------------------------------------------------------|---------------------------------------------------------------------------------------------------------------|-------------------------------------------------------------------------------------|-------------------------------------------------------------------------------------|-------------------------------------------------------------------------------------|-----------------------------------------------------------------------------------|-----------------------------------------------------------------------------------|-----------------------------------------------------------------------------------|-----------------------------------------------------------------------------------|-----------------------------------------------------------------------------------|-----------------------------------------------------------------------------------|---------------------------------------------------------------------------------------------------------------------------------------------------------------------------------------------------------------------------------------------------------------------------------------------------------------------------------------------------------------------------------------------------------------------------------------------------------------------------------------------------------------------------------------------------------------------------------------------------------------------------------------------------------------------------------------------------------------------------------------------------------------------------------------------------------------------------------------------------------------------------------------------------------------------------------------------------------------------------------------------------------------|-----------------------------------------------------------------------------------|------------------------------------------------------------------------------------|-------------------------------------------------------------------------------------|-------------------------------------------------------------------------------------|-------------------------------------------------------------------------------------|-----------------------------------------------------------------------------------|------------------------------------------------------------------------------------|-------------------------------------------------------------------------------------|-------------------------------------------------------------------------------------|-------------------------------------------------------------------------------------|
| 4 out of 10 chance of Full Health <br>6 out of 10 chance of Health State B                                                                                                                                                                                                                                                                                                                                                                                                                                                                                                                                                                                                                                                                                                                                                    | Definitely Health State A  |                                                                                     |                                                                                     |                                                                                     |                                                                                   |                                                                                   |                                                                                   |                                                                                   |                                                                                   |                                                                                   |                                                                                                                                                                                                                                                                                                                                                                                                                                                                                                                                                                                                                                                                                                                                                                                                                                                                                                                                                                                                               |                                                                                   |                                                                                    |                                                                                     |                                                                                     |                                                                                     |                                                                                   |                                                                                    |                                                                                     |                                                                                     |                                                                                     |
| <table border="1"><tbody><tr><td></td><td></td><td></td><td></td><td></td></tr><tr><td></td><td></td><td></td><td></td><td></td></tr></tbody></table> |                              |    |    |    |  |  |  |  |  |  | <table border="1"><tbody><tr><td></td><td></td><td></td><td></td><td></td></tr><tr><td></td><td></td><td></td><td></td><td></td></tr></tbody></table> |  |  |  |  |  |  |  |  |  |  |
|                                                                                                                                                                                                                                                                                                                                                                                                                                                                                                                                                                                                                                                                                                                                                                                                                                                                                                                |                              |    |    |    |                                                                                   |                                                                                   |                                                                                   |                                                                                   |                                                                                   |                                                                                   |                                                                                                                                                                                                                                                                                                                                                                                                                                                                                                                                                                                                                                                                                                                                                                                                                                                                                                                                                                                                               |                                                                                   |                                                                                    |                                                                                     |                                                                                     |                                                                                     |                                                                                   |                                                                                    |                                                                                     |                                                                                     |                                                                                     |
|                                                                                                                                                                                                                                                                                                                                                                                                                                                                                                                                                                                                                                                                                                                                                                                                                                                                                                                |                              |    |    |    |                                                                                   |                                                                                   |                                                                                   |                                                                                   |                                                                                   |                                                                                   |                                                                                                                                                                                                                                                                                                                                                                                                                                                                                                                                                                                                                                                                                                                                                                                                                                                                                                                                                                                                               |                                                                                   |                                                                                    |                                                                                     |                                                                                     |                                                                                     |                                                                                   |                                                                                    |                                                                                     |                                                                                     |                                                                                     |
|                                                                                                                                                                                                                                                                                                                                                                                                                                                                                                                                                                                                                                                                                                                                                                                                                                                                                                                |                             |  |  |  |                                                                                   |                                                                                   |                                                                                   |                                                                                   |                                                                                   |                                                                                   |                                                                                                                                                                                                                                                                                                                                                                                                                                                                                                                                                                                                                                                                                                                                                                                                                                                                                                                                                                                                               |                                                                                   |                                                                                    |                                                                                     |                                                                                     |                                                                                     |                                                                                   |                                                                                    |                                                                                     |                                                                                     |                                                                                     |
|                                                                                                                                                                                                                                                                                                                                                                                                                                                                                                                                                                                                                                                                                                                                                                                                                                                                                                                |                             |  |  |  |                                                                                   |                                                                                   |                                                                                   |                                                                                   |                                                                                   |                                                                                   |                                                                                                                                                                                                                                                                                                                                                                                                                                                                                                                                                                                                                                                                                                                                                                                                                                                                                                                                                                                                               |                                                                                   |                                                                                    |                                                                                     |                                                                                     |                                                                                     |                                                                                   |                                                                                    |                                                                                     |                                                                                     |                                                                                     |

Option 1: 4 out of 10 chance of Full Health, and 6 out of 10 chance of Health State B

or

Option 2: Definitely Health State A

[Now go to question 6.5]

(f) Which option do you prefer:

| Option 1                                                                                                                                                                                                                                                                                                                                                                                                                                                                                                                                                                                                                                                                                                                                                                                                                                                                                                                                                                                                            | Option 2                                                                                                        |                                                                                       |                                                                                       |                                                                                       |                                                                                     |                                                                                     |                                                                                     |                                                                                     |                                                                                     |                                                                                     |                                                                                                                                                                                                                                                                                                                                                                                                                                                                                                                                                                                                                                                                                                                                                                                                                                                                                                                                                                                                                                   |                                                                                     |                                                                                      |                                                                                       |                                                                                       |                                                                                       |                                                                                     |                                                                                      |                                                                                       |                                                                                       |                                                                                       |
|---------------------------------------------------------------------------------------------------------------------------------------------------------------------------------------------------------------------------------------------------------------------------------------------------------------------------------------------------------------------------------------------------------------------------------------------------------------------------------------------------------------------------------------------------------------------------------------------------------------------------------------------------------------------------------------------------------------------------------------------------------------------------------------------------------------------------------------------------------------------------------------------------------------------------------------------------------------------------------------------------------------------|-----------------------------------------------------------------------------------------------------------------|---------------------------------------------------------------------------------------|---------------------------------------------------------------------------------------|---------------------------------------------------------------------------------------|-------------------------------------------------------------------------------------|-------------------------------------------------------------------------------------|-------------------------------------------------------------------------------------|-------------------------------------------------------------------------------------|-------------------------------------------------------------------------------------|-------------------------------------------------------------------------------------|-----------------------------------------------------------------------------------------------------------------------------------------------------------------------------------------------------------------------------------------------------------------------------------------------------------------------------------------------------------------------------------------------------------------------------------------------------------------------------------------------------------------------------------------------------------------------------------------------------------------------------------------------------------------------------------------------------------------------------------------------------------------------------------------------------------------------------------------------------------------------------------------------------------------------------------------------------------------------------------------------------------------------------------|-------------------------------------------------------------------------------------|--------------------------------------------------------------------------------------|---------------------------------------------------------------------------------------|---------------------------------------------------------------------------------------|---------------------------------------------------------------------------------------|-------------------------------------------------------------------------------------|--------------------------------------------------------------------------------------|---------------------------------------------------------------------------------------|---------------------------------------------------------------------------------------|---------------------------------------------------------------------------------------|
| 9 out of 10 chance of Full Health <br>1 out of 10 chance of Health State B                                                                                                                                                                                                                                                                                                                                                                                                                                                                                                                                                                                                                                                                                                                                                                    | Definitely Health State A  |                                                                                       |                                                                                       |                                                                                       |                                                                                     |                                                                                     |                                                                                     |                                                                                     |                                                                                     |                                                                                     |                                                                                                                                                                                                                                                                                                                                                                                                                                                                                                                                                                                                                                                                                                                                                                                                                                                                                                                                                                                                                                   |                                                                                     |                                                                                      |                                                                                       |                                                                                       |                                                                                       |                                                                                     |                                                                                      |                                                                                       |                                                                                       |                                                                                       |
| <table border="1"><tbody><tr><td></td><td></td><td></td><td></td><td></td></tr><tr><td></td><td></td><td></td><td></td><td></td></tr></tbody></table> |                              |    |    |    |  |  |  |  |  |  | <table border="1"><tbody><tr><td></td><td></td><td></td><td></td><td></td></tr><tr><td></td><td></td><td></td><td></td><td></td></tr></tbody></table> |  |  |  |  |  |  |  |  |  |  |
|                                                                                                                                                                                                                                                                                                                                                                                                                                                                                                                                                                                                                                                                                                                                                                                                                                                                                                                                  |                              |    |    |    |                                                                                     |                                                                                     |                                                                                     |                                                                                     |                                                                                     |                                                                                     |                                                                                                                                                                                                                                                                                                                                                                                                                                                                                                                                                                                                                                                                                                                                                                                                                                                                                                                                                                                                                                   |                                                                                     |                                                                                      |                                                                                       |                                                                                       |                                                                                       |                                                                                     |                                                                                      |                                                                                       |                                                                                       |                                                                                       |
|                                                                                                                                                                                                                                                                                                                                                                                                                                                                                                                                                                                                                                                                                                                                                                                                                                                                                                                                  |                              |    |    |    |                                                                                     |                                                                                     |                                                                                     |                                                                                     |                                                                                     |                                                                                     |                                                                                                                                                                                                                                                                                                                                                                                                                                                                                                                                                                                                                                                                                                                                                                                                                                                                                                                                                                                                                                   |                                                                                     |                                                                                      |                                                                                       |                                                                                       |                                                                                       |                                                                                     |                                                                                      |                                                                                       |                                                                                       |                                                                                       |
|                                                                                                                                                                                                                                                                                                                                                                                                                                                                                                                                                                                                                                                                                                                                                                                                                                                                                                                                  |                             |  |  |  |                                                                                     |                                                                                     |                                                                                     |                                                                                     |                                                                                     |                                                                                     |                                                                                                                                                                                                                                                                                                                                                                                                                                                                                                                                                                                                                                                                                                                                                                                                                                                                                                                                                                                                                                   |                                                                                     |                                                                                      |                                                                                       |                                                                                       |                                                                                       |                                                                                     |                                                                                      |                                                                                       |                                                                                       |                                                                                       |
|                                                                                                                                                                                                                                                                                                                                                                                                                                                                                                                                                                                                                                                                                                                                                                                                                                                                                                                                  |                             |  |  |  |                                                                                     |                                                                                     |                                                                                     |                                                                                     |                                                                                     |                                                                                     |                                                                                                                                                                                                                                                                                                                                                                                                                                                                                                                                                                                                                                                                                                                                                                                                                                                                                                                                                                                                                                   |                                                                                     |                                                                                      |                                                                                       |                                                                                       |                                                                                       |                                                                                     |                                                                                      |                                                                                       |                                                                                       |                                                                                       |

Option 1: 9 out of 10 chance of Full Health, and 1 out of 10 chance of Health State B

or

Option 2: Definitely Health State A

*[If Option 2, go to part (j)]*

(g) Which option do you prefer:

| Option 1                                                                                                                                                                                                                                                                                                                                                                                                                                                                                                                                                                                                                                                                                                                                                                                                                                                                                                                                                                                        | Option 2                                                                                                      |                                                                                     |                                                                                     |                                                                                     |                                                                                   |                                                                                   |                                                                                   |                                                                                   |                                                                                   |                                                                                   |                                                                                                                                                                                                                                                                                                                                                                                                                                                                                                                                                                                                                                                                                                                                                                                                                                                                                                                                                                                                                 |                                                                                   |                                                                                     |                                                                                     |                                                                                     |                                                                                     |                                                                                   |                                                                                     |                                                                                     |                                                                                     |                                                                                     |
|-------------------------------------------------------------------------------------------------------------------------------------------------------------------------------------------------------------------------------------------------------------------------------------------------------------------------------------------------------------------------------------------------------------------------------------------------------------------------------------------------------------------------------------------------------------------------------------------------------------------------------------------------------------------------------------------------------------------------------------------------------------------------------------------------------------------------------------------------------------------------------------------------------------------------------------------------------------------------------------------------|---------------------------------------------------------------------------------------------------------------|-------------------------------------------------------------------------------------|-------------------------------------------------------------------------------------|-------------------------------------------------------------------------------------|-----------------------------------------------------------------------------------|-----------------------------------------------------------------------------------|-----------------------------------------------------------------------------------|-----------------------------------------------------------------------------------|-----------------------------------------------------------------------------------|-----------------------------------------------------------------------------------|-----------------------------------------------------------------------------------------------------------------------------------------------------------------------------------------------------------------------------------------------------------------------------------------------------------------------------------------------------------------------------------------------------------------------------------------------------------------------------------------------------------------------------------------------------------------------------------------------------------------------------------------------------------------------------------------------------------------------------------------------------------------------------------------------------------------------------------------------------------------------------------------------------------------------------------------------------------------------------------------------------------------|-----------------------------------------------------------------------------------|-------------------------------------------------------------------------------------|-------------------------------------------------------------------------------------|-------------------------------------------------------------------------------------|-------------------------------------------------------------------------------------|-----------------------------------------------------------------------------------|-------------------------------------------------------------------------------------|-------------------------------------------------------------------------------------|-------------------------------------------------------------------------------------|-------------------------------------------------------------------------------------|
| 7 out of 10 chance of Full Health <br>3 out of 10 chance of Health State B                                                                                                                                                                                                                                                                                                                                                                                                                                                                                                                                                                                                                                                                                                                                                    | Definitely Health State A  |                                                                                     |                                                                                     |                                                                                     |                                                                                   |                                                                                   |                                                                                   |                                                                                   |                                                                                   |                                                                                   |                                                                                                                                                                                                                                                                                                                                                                                                                                                                                                                                                                                                                                                                                                                                                                                                                                                                                                                                                                                                                 |                                                                                   |                                                                                     |                                                                                     |                                                                                     |                                                                                     |                                                                                   |                                                                                     |                                                                                     |                                                                                     |                                                                                     |
| <table border="1"><tbody><tr><td></td><td></td><td></td><td></td><td></td></tr><tr><td></td><td></td><td></td><td></td><td></td></tr></tbody></table> |                              |    |    |    |  |  |  |  |  |  | <table border="1"><tbody><tr><td></td><td></td><td></td><td></td><td></td></tr><tr><td></td><td></td><td></td><td></td><td></td></tr></tbody></table> |  |  |  |  |  |  |  |  |  |  |
|                                                                                                                                                                                                                                                                                                                                                                                                                                                                                                                                                                                                                                                                                                                                                                                                                                                                                                                |                              |    |    |    |                                                                                   |                                                                                   |                                                                                   |                                                                                   |                                                                                   |                                                                                   |                                                                                                                                                                                                                                                                                                                                                                                                                                                                                                                                                                                                                                                                                                                                                                                                                                                                                                                                                                                                                 |                                                                                   |                                                                                     |                                                                                     |                                                                                     |                                                                                     |                                                                                   |                                                                                     |                                                                                     |                                                                                     |                                                                                     |
|                                                                                                                                                                                                                                                                                                                                                                                                                                                                                                                                                                                                                                                                                                                                                                                                                                                                                                                |                              |    |    |    |                                                                                   |                                                                                   |                                                                                   |                                                                                   |                                                                                   |                                                                                   |                                                                                                                                                                                                                                                                                                                                                                                                                                                                                                                                                                                                                                                                                                                                                                                                                                                                                                                                                                                                                 |                                                                                   |                                                                                     |                                                                                     |                                                                                     |                                                                                     |                                                                                   |                                                                                     |                                                                                     |                                                                                     |                                                                                     |
|                                                                                                                                                                                                                                                                                                                                                                                                                                                                                                                                                                                                                                                                                                                                                                                                                                                                                                                |                            |  |  |  |                                                                                   |                                                                                   |                                                                                   |                                                                                   |                                                                                   |                                                                                   |                                                                                                                                                                                                                                                                                                                                                                                                                                                                                                                                                                                                                                                                                                                                                                                                                                                                                                                                                                                                                 |                                                                                   |                                                                                     |                                                                                     |                                                                                     |                                                                                     |                                                                                   |                                                                                     |                                                                                     |                                                                                     |                                                                                     |
|                                                                                                                                                                                                                                                                                                                                                                                                                                                                                                                                                                                                                                                                                                                                                                                                                                                                                                                |                            |  |  |  |                                                                                   |                                                                                   |                                                                                   |                                                                                   |                                                                                   |                                                                                   |                                                                                                                                                                                                                                                                                                                                                                                                                                                                                                                                                                                                                                                                                                                                                                                                                                                                                                                                                                                                                 |                                                                                   |                                                                                     |                                                                                     |                                                                                     |                                                                                     |                                                                                   |                                                                                     |                                                                                     |                                                                                     |                                                                                     |

**Option 1: 7 out of 10** chance of Full Health, and **3 out of 10** chance of Health State B

or

**Option 2:** Definitely Health State A

*[If Option 2, go to part (i)]*

(h) Which option do you prefer:

| Option 1                                                                                                                                                                                                                                                                                                                                                                                                                                                                                                                                                                                                                                                                                                                                                                                                                                                                                                                                                                                                            | Option 2                                                                                                        |                                                                                       |                                                                                       |                                                                                       |                                                                                     |                                                                                     |                                                                                     |                                                                                     |                                                                                     |                                                                                     |                                                                                                                                                                                                                                                                                                                                                                                                                                                                                                                                                                                                                                                                                                                                                                                                                                                                                                                                                                                                                                     |                                                                                     |                                                                                       |                                                                                       |                                                                                       |                                                                                       |                                                                                     |                                                                                       |                                                                                       |                                                                                       |                                                                                       |
|---------------------------------------------------------------------------------------------------------------------------------------------------------------------------------------------------------------------------------------------------------------------------------------------------------------------------------------------------------------------------------------------------------------------------------------------------------------------------------------------------------------------------------------------------------------------------------------------------------------------------------------------------------------------------------------------------------------------------------------------------------------------------------------------------------------------------------------------------------------------------------------------------------------------------------------------------------------------------------------------------------------------|-----------------------------------------------------------------------------------------------------------------|---------------------------------------------------------------------------------------|---------------------------------------------------------------------------------------|---------------------------------------------------------------------------------------|-------------------------------------------------------------------------------------|-------------------------------------------------------------------------------------|-------------------------------------------------------------------------------------|-------------------------------------------------------------------------------------|-------------------------------------------------------------------------------------|-------------------------------------------------------------------------------------|-------------------------------------------------------------------------------------------------------------------------------------------------------------------------------------------------------------------------------------------------------------------------------------------------------------------------------------------------------------------------------------------------------------------------------------------------------------------------------------------------------------------------------------------------------------------------------------------------------------------------------------------------------------------------------------------------------------------------------------------------------------------------------------------------------------------------------------------------------------------------------------------------------------------------------------------------------------------------------------------------------------------------------------|-------------------------------------------------------------------------------------|---------------------------------------------------------------------------------------|---------------------------------------------------------------------------------------|---------------------------------------------------------------------------------------|---------------------------------------------------------------------------------------|-------------------------------------------------------------------------------------|---------------------------------------------------------------------------------------|---------------------------------------------------------------------------------------|---------------------------------------------------------------------------------------|---------------------------------------------------------------------------------------|
| 6 out of 10 chance of Full Health <br>4 out of 10 chance of Health State B                                                                                                                                                                                                                                                                                                                                                                                                                                                                                                                                                                                                                                                                                                                                                                    | Definitely Health State A  |                                                                                       |                                                                                       |                                                                                       |                                                                                     |                                                                                     |                                                                                     |                                                                                     |                                                                                     |                                                                                     |                                                                                                                                                                                                                                                                                                                                                                                                                                                                                                                                                                                                                                                                                                                                                                                                                                                                                                                                                                                                                                     |                                                                                     |                                                                                       |                                                                                       |                                                                                       |                                                                                       |                                                                                     |                                                                                       |                                                                                       |                                                                                       |                                                                                       |
| <table border="1"><tbody><tr><td></td><td></td><td></td><td></td><td></td></tr><tr><td></td><td></td><td></td><td></td><td></td></tr></tbody></table> |                              |    |    |    |  |  |  |  |  |  | <table border="1"><tbody><tr><td></td><td></td><td></td><td></td><td></td></tr><tr><td></td><td></td><td></td><td></td><td></td></tr></tbody></table> |  |  |  |  |  |  |  |  |  |  |
|                                                                                                                                                                                                                                                                                                                                                                                                                                                                                                                                                                                                                                                                                                                                                                                                                                                                                                                                  |                              |    |    |    |                                                                                     |                                                                                     |                                                                                     |                                                                                     |                                                                                     |                                                                                     |                                                                                                                                                                                                                                                                                                                                                                                                                                                                                                                                                                                                                                                                                                                                                                                                                                                                                                                                                                                                                                     |                                                                                     |                                                                                       |                                                                                       |                                                                                       |                                                                                       |                                                                                     |                                                                                       |                                                                                       |                                                                                       |                                                                                       |
|                                                                                                                                                                                                                                                                                                                                                                                                                                                                                                                                                                                                                                                                                                                                                                                                                                                                                                                                  |                              |    |    |    |                                                                                     |                                                                                     |                                                                                     |                                                                                     |                                                                                     |                                                                                     |                                                                                                                                                                                                                                                                                                                                                                                                                                                                                                                                                                                                                                                                                                                                                                                                                                                                                                                                                                                                                                     |                                                                                     |                                                                                       |                                                                                       |                                                                                       |                                                                                       |                                                                                     |                                                                                       |                                                                                       |                                                                                       |                                                                                       |
|                                                                                                                                                                                                                                                                                                                                                                                                                                                                                                                                                                                                                                                                                                                                                                                                                                                                                                                                  |                            |  |  |  |                                                                                     |                                                                                     |                                                                                     |                                                                                     |                                                                                     |                                                                                     |                                                                                                                                                                                                                                                                                                                                                                                                                                                                                                                                                                                                                                                                                                                                                                                                                                                                                                                                                                                                                                     |                                                                                     |                                                                                       |                                                                                       |                                                                                       |                                                                                       |                                                                                     |                                                                                       |                                                                                       |                                                                                       |                                                                                       |
|                                                                                                                                                                                                                                                                                                                                                                                                                                                                                                                                                                                                                                                                                                                                                                                                                                                                                                                                  |                            |  |  |  |                                                                                     |                                                                                     |                                                                                     |                                                                                     |                                                                                     |                                                                                     |                                                                                                                                                                                                                                                                                                                                                                                                                                                                                                                                                                                                                                                                                                                                                                                                                                                                                                                                                                                                                                     |                                                                                     |                                                                                       |                                                                                       |                                                                                       |                                                                                       |                                                                                     |                                                                                       |                                                                                       |                                                                                       |                                                                                       |

**Option 1: 6 out of 10** chance of Full Health, and **4 out of 10** chance of Health State B

or

**Option 2:** Definitely Health State A

[Now go to question 6.5]

(i) Which option do you prefer:

| Option 1                                                                                                                                                                                               | Option 2                          |  |  |  |  |  |  |  |  |  |                                                                                                                                                                                                        |  |  |  |  |  |  |  |  |  |  |
|--------------------------------------------------------------------------------------------------------------------------------------------------------------------------------------------------------|-----------------------------------|--|--|--|--|--|--|--|--|--|--------------------------------------------------------------------------------------------------------------------------------------------------------------------------------------------------------|--|--|--|--|--|--|--|--|--|--|
| <p>8 out of 10 chance of Full Health </p> <p>2 out of 10 chance of Health State B </p>                                                                                                                 | <p>Definitely Health State A </p> |  |  |  |  |  |  |  |  |  |                                                                                                                                                                                                        |  |  |  |  |  |  |  |  |  |  |
| <table border="1" style="margin: auto; border-collapse: collapse;"> <tr> <td></td> <td></td> <td></td> <td></td> <td></td> </tr> <tr> <td></td> <td></td> <td></td> <td></td> <td></td> </tr> </table> |                                   |  |  |  |  |  |  |  |  |  | <table border="1" style="margin: auto; border-collapse: collapse;"> <tr> <td></td> <td></td> <td></td> <td></td> <td></td> </tr> <tr> <td></td> <td></td> <td></td> <td></td> <td></td> </tr> </table> |  |  |  |  |  |  |  |  |  |  |
|                                                                                                                                                                                                        |                                   |  |  |  |  |  |  |  |  |  |                                                                                                                                                                                                        |  |  |  |  |  |  |  |  |  |  |
|                                                                                                                                                                                                        |                                   |  |  |  |  |  |  |  |  |  |                                                                                                                                                                                                        |  |  |  |  |  |  |  |  |  |  |
|                                                                                                                                                                                                        |                                   |  |  |  |  |  |  |  |  |  |                                                                                                                                                                                                        |  |  |  |  |  |  |  |  |  |  |
|                                                                                                                                                                                                        |                                   |  |  |  |  |  |  |  |  |  |                                                                                                                                                                                                        |  |  |  |  |  |  |  |  |  |  |

**Option 1:** 8 out of 10 chance of Full Health, and 2 out of 10 chance of Health State B

or

**Option 2:** Definitely Health State A

[Now go to question 6.5]

(j) You have indicated that you would not prefer Option 1 to Option 2 even if the chance of Health State B in Option 1 was as low as 1 out of 10. How low would the chance of Health State B in Option 1 (*probably Full Health but a small chance of Health State B*) need to be for you to prefer Option 1 to Option 2 (*Definitely Health State A*)?

| Option 1                                                                                                                                                                                               | Option 2                          |  |  |  |  |  |  |  |  |  |                                                                                                                                                                                                        |  |  |  |  |  |  |  |  |  |  |
|--------------------------------------------------------------------------------------------------------------------------------------------------------------------------------------------------------|-----------------------------------|--|--|--|--|--|--|--|--|--|--------------------------------------------------------------------------------------------------------------------------------------------------------------------------------------------------------|--|--|--|--|--|--|--|--|--|--|
| <p>Probably Full Health </p> <p>Small chance of Health State B </p>                                                                                                                                    | <p>Definitely Health State A </p> |  |  |  |  |  |  |  |  |  |                                                                                                                                                                                                        |  |  |  |  |  |  |  |  |  |  |
| <table border="1" style="margin: auto; border-collapse: collapse;"> <tr> <td></td> <td></td> <td></td> <td></td> <td></td> </tr> <tr> <td></td> <td></td> <td></td> <td></td> <td></td> </tr> </table> |                                   |  |  |  |  |  |  |  |  |  | <table border="1" style="margin: auto; border-collapse: collapse;"> <tr> <td></td> <td></td> <td></td> <td></td> <td></td> </tr> <tr> <td></td> <td></td> <td></td> <td></td> <td></td> </tr> </table> |  |  |  |  |  |  |  |  |  |  |
|                                                                                                                                                                                                        |                                   |  |  |  |  |  |  |  |  |  |                                                                                                                                                                                                        |  |  |  |  |  |  |  |  |  |  |
|                                                                                                                                                                                                        |                                   |  |  |  |  |  |  |  |  |  |                                                                                                                                                                                                        |  |  |  |  |  |  |  |  |  |  |
|                                                                                                                                                                                                        |                                   |  |  |  |  |  |  |  |  |  |                                                                                                                                                                                                        |  |  |  |  |  |  |  |  |  |  |
|                                                                                                                                                                                                        |                                   |  |  |  |  |  |  |  |  |  |                                                                                                                                                                                                        |  |  |  |  |  |  |  |  |  |  |

Please indicate your answer by writing a number bigger than 10 in the box below; the number can be as big as you want, with as many digits as you need. (If you would never prefer Option 1, no matter how unlikely Health State B is, please write the letter "N" in the box instead of a number).

*I would prefer Option 1 to Option 2, if the chance of Health State B in Option 1 was less than*

*1 out of*

6: VERSION 2: This question is about views on risks to health. You have two options, 1 and 2. The options vary in terms of your health state over the next two weeks.

In option 1, you will definitely be in Health State A.

In option 2, there is a chance of being in Full Health, but also a chance of being in Health State B. So option 2 is like a lottery: you might be in Full Health, but you may also be in Health State B. *You do not know beforehand which of these health states you will experience: Full Health or Health State B.*

In the following questions, we will vary the chance of Full Health in Option 2 and, in each case, ask you to say whether you prefer Option 1 or Option 2 by marking an 'X' in the appropriate box.

(a) Which option do you prefer:

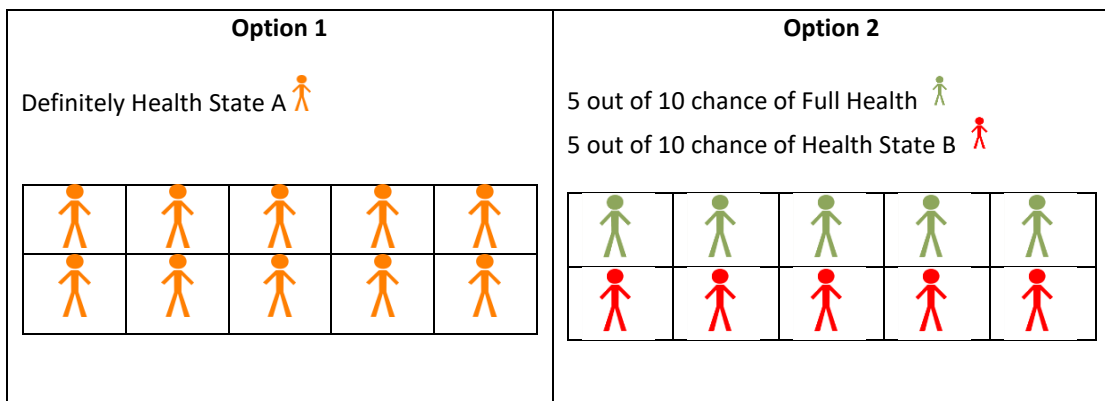

**Option 1:** Definitely Health State A

or

**Option 2:** 5 out of 10 chance of Full Health, and 5 out of 10 chance of Health State B

*[If Option 1, go to part (f)]*

(b) Which option do you prefer:

| Option 1                                                                                                                                                                                                                                                                                                                                                                                                                                                                                                                                                                                                                                                                                                                                                                                                                                                                                                                                                                                        | Option 2                                                                                                                                                                                                                                          |                                                                                     |                                                                                     |                                                                                     |                                                                                   |                                                                                   |                                                                                   |                                                                                   |                                                                                   |                                                                                   |                                                                                                                                                                                                                                                                                                                                                                                                                                                                                                                                                                                                                                                                                                                                                                                                                                                                                                                                                                                                               |                                                                                   |                                                                                    |                                                                                     |                                                                                     |                                                                                     |                                                                                   |                                                                                    |                                                                                     |                                                                                     |                                                                                     |
|-------------------------------------------------------------------------------------------------------------------------------------------------------------------------------------------------------------------------------------------------------------------------------------------------------------------------------------------------------------------------------------------------------------------------------------------------------------------------------------------------------------------------------------------------------------------------------------------------------------------------------------------------------------------------------------------------------------------------------------------------------------------------------------------------------------------------------------------------------------------------------------------------------------------------------------------------------------------------------------------------|---------------------------------------------------------------------------------------------------------------------------------------------------------------------------------------------------------------------------------------------------|-------------------------------------------------------------------------------------|-------------------------------------------------------------------------------------|-------------------------------------------------------------------------------------|-----------------------------------------------------------------------------------|-----------------------------------------------------------------------------------|-----------------------------------------------------------------------------------|-----------------------------------------------------------------------------------|-----------------------------------------------------------------------------------|-----------------------------------------------------------------------------------|---------------------------------------------------------------------------------------------------------------------------------------------------------------------------------------------------------------------------------------------------------------------------------------------------------------------------------------------------------------------------------------------------------------------------------------------------------------------------------------------------------------------------------------------------------------------------------------------------------------------------------------------------------------------------------------------------------------------------------------------------------------------------------------------------------------------------------------------------------------------------------------------------------------------------------------------------------------------------------------------------------------|-----------------------------------------------------------------------------------|------------------------------------------------------------------------------------|-------------------------------------------------------------------------------------|-------------------------------------------------------------------------------------|-------------------------------------------------------------------------------------|-----------------------------------------------------------------------------------|------------------------------------------------------------------------------------|-------------------------------------------------------------------------------------|-------------------------------------------------------------------------------------|-------------------------------------------------------------------------------------|
| Definitely Health State A                                                                                                                                                                                                                                                                                                                                                                                                                                                                                                                                                                                                                                                                                                                                                                                                                                                                                      | 1 out of 10 chance of Full Health <br>9 out of 10 chance of Health State B  |                                                                                     |                                                                                     |                                                                                     |                                                                                   |                                                                                   |                                                                                   |                                                                                   |                                                                                   |                                                                                   |                                                                                                                                                                                                                                                                                                                                                                                                                                                                                                                                                                                                                                                                                                                                                                                                                                                                                                                                                                                                               |                                                                                   |                                                                                    |                                                                                     |                                                                                     |                                                                                     |                                                                                   |                                                                                    |                                                                                     |                                                                                     |                                                                                     |
| <table border="1"><tbody><tr><td></td><td></td><td></td><td></td><td></td></tr><tr><td></td><td></td><td></td><td></td><td></td></tr></tbody></table> |                                                                                                                                                                  |    |    |    |  |  |  |  |  |  | <table border="1"><tbody><tr><td></td><td></td><td></td><td></td><td></td></tr><tr><td></td><td></td><td></td><td></td><td></td></tr></tbody></table> |  |  |  |  |  |  |  |  |  |  |
|                                                                                                                                                                                                                                                                                                                                                                                                                                                                                                                                                                                                                                                                                                                                                                                                                                                                                                                |                                                                                                                                                                  |    |    |    |                                                                                   |                                                                                   |                                                                                   |                                                                                   |                                                                                   |                                                                                   |                                                                                                                                                                                                                                                                                                                                                                                                                                                                                                                                                                                                                                                                                                                                                                                                                                                                                                                                                                                                               |                                                                                   |                                                                                    |                                                                                     |                                                                                     |                                                                                     |                                                                                   |                                                                                    |                                                                                     |                                                                                     |                                                                                     |
|                                                                                                                                                                                                                                                                                                                                                                                                                                                                                                                                                                                                                                                                                                                                                                                                                                                                                                                |                                                                                                                                                                  |    |    |    |                                                                                   |                                                                                   |                                                                                   |                                                                                   |                                                                                   |                                                                                   |                                                                                                                                                                                                                                                                                                                                                                                                                                                                                                                                                                                                                                                                                                                                                                                                                                                                                                                                                                                                               |                                                                                   |                                                                                    |                                                                                     |                                                                                     |                                                                                     |                                                                                   |                                                                                    |                                                                                     |                                                                                     |                                                                                     |
|                                                                                                                                                                                                                                                                                                                                                                                                                                                                                                                                                                                                                                                                                                                                                                                                                                                                                                                |                                                                                                                                                                 |  |  |  |                                                                                   |                                                                                   |                                                                                   |                                                                                   |                                                                                   |                                                                                   |                                                                                                                                                                                                                                                                                                                                                                                                                                                                                                                                                                                                                                                                                                                                                                                                                                                                                                                                                                                                               |                                                                                   |                                                                                    |                                                                                     |                                                                                     |                                                                                     |                                                                                   |                                                                                    |                                                                                     |                                                                                     |                                                                                     |
|                                                                                                                                                                                                                                                                                                                                                                                                                                                                                                                                                                                                                                                                                                                                                                                                                                                                                                                |                                                                                                                                                                 |  |  |  |                                                                                   |                                                                                   |                                                                                   |                                                                                   |                                                                                   |                                                                                   |                                                                                                                                                                                                                                                                                                                                                                                                                                                                                                                                                                                                                                                                                                                                                                                                                                                                                                                                                                                                               |                                                                                   |                                                                                    |                                                                                     |                                                                                     |                                                                                     |                                                                                   |                                                                                    |                                                                                     |                                                                                     |                                                                                     |

**Option 1:** Definitely Health State A

or

**Option 2:** 1 out of 10 chance of Full Health, and 9 out of 10 chance of Health State B

*[If Option 2, go to question 6.5]*

(c) Which option do you prefer:

| Option 1                                                                                                                                                                                                                                                                                                                                                                                                                                                                                                                                                                                                                                                                                                                                                                                                                                                                                                                                                                                                            | Option 2                                                                                                                                                                                                                                              |                                                                                       |                                                                                       |                                                                                       |                                                                                     |                                                                                     |                                                                                     |                                                                                     |                                                                                     |                                                                                     |                                                                                                                                                                                                                                                                                                                                                                                                                                                                                                                                                                                                                                                                                                                                                                                                                                                                                                                                                                                                                                   |                                                                                     |                                                                                      |                                                                                       |                                                                                       |                                                                                       |                                                                                     |                                                                                      |                                                                                       |                                                                                       |                                                                                       |
|---------------------------------------------------------------------------------------------------------------------------------------------------------------------------------------------------------------------------------------------------------------------------------------------------------------------------------------------------------------------------------------------------------------------------------------------------------------------------------------------------------------------------------------------------------------------------------------------------------------------------------------------------------------------------------------------------------------------------------------------------------------------------------------------------------------------------------------------------------------------------------------------------------------------------------------------------------------------------------------------------------------------|-------------------------------------------------------------------------------------------------------------------------------------------------------------------------------------------------------------------------------------------------------|---------------------------------------------------------------------------------------|---------------------------------------------------------------------------------------|---------------------------------------------------------------------------------------|-------------------------------------------------------------------------------------|-------------------------------------------------------------------------------------|-------------------------------------------------------------------------------------|-------------------------------------------------------------------------------------|-------------------------------------------------------------------------------------|-------------------------------------------------------------------------------------|-----------------------------------------------------------------------------------------------------------------------------------------------------------------------------------------------------------------------------------------------------------------------------------------------------------------------------------------------------------------------------------------------------------------------------------------------------------------------------------------------------------------------------------------------------------------------------------------------------------------------------------------------------------------------------------------------------------------------------------------------------------------------------------------------------------------------------------------------------------------------------------------------------------------------------------------------------------------------------------------------------------------------------------|-------------------------------------------------------------------------------------|--------------------------------------------------------------------------------------|---------------------------------------------------------------------------------------|---------------------------------------------------------------------------------------|---------------------------------------------------------------------------------------|-------------------------------------------------------------------------------------|--------------------------------------------------------------------------------------|---------------------------------------------------------------------------------------|---------------------------------------------------------------------------------------|---------------------------------------------------------------------------------------|
| Definitely Health State A                                                                                                                                                                                                                                                                                                                                                                                                                                                                                                                                                                                                                                                                                                                                                                                                                                                                                                        | 3 out of 10 chance of Full Health <br>7 out of 10 chance of Health State B  |                                                                                       |                                                                                       |                                                                                       |                                                                                     |                                                                                     |                                                                                     |                                                                                     |                                                                                     |                                                                                     |                                                                                                                                                                                                                                                                                                                                                                                                                                                                                                                                                                                                                                                                                                                                                                                                                                                                                                                                                                                                                                   |                                                                                     |                                                                                      |                                                                                       |                                                                                       |                                                                                       |                                                                                     |                                                                                      |                                                                                       |                                                                                       |                                                                                       |
| <table border="1"><tbody><tr><td></td><td></td><td></td><td></td><td></td></tr><tr><td></td><td></td><td></td><td></td><td></td></tr></tbody></table> |                                                                                                                                                                    |    |    |    |  |  |  |  |  |  | <table border="1"><tbody><tr><td></td><td></td><td></td><td></td><td></td></tr><tr><td></td><td></td><td></td><td></td><td></td></tr></tbody></table> |  |  |  |  |  |  |  |  |  |  |
|                                                                                                                                                                                                                                                                                                                                                                                                                                                                                                                                                                                                                                                                                                                                                                                                                                                                                                                                  |                                                                                                                                                                    |    |    |    |                                                                                     |                                                                                     |                                                                                     |                                                                                     |                                                                                     |                                                                                     |                                                                                                                                                                                                                                                                                                                                                                                                                                                                                                                                                                                                                                                                                                                                                                                                                                                                                                                                                                                                                                   |                                                                                     |                                                                                      |                                                                                       |                                                                                       |                                                                                       |                                                                                     |                                                                                      |                                                                                       |                                                                                       |                                                                                       |
|                                                                                                                                                                                                                                                                                                                                                                                                                                                                                                                                                                                                                                                                                                                                                                                                                                                                                                                                  |                                                                                                                                                                    |    |    |    |                                                                                     |                                                                                     |                                                                                     |                                                                                     |                                                                                     |                                                                                     |                                                                                                                                                                                                                                                                                                                                                                                                                                                                                                                                                                                                                                                                                                                                                                                                                                                                                                                                                                                                                                   |                                                                                     |                                                                                      |                                                                                       |                                                                                       |                                                                                       |                                                                                     |                                                                                      |                                                                                       |                                                                                       |                                                                                       |
|                                                                                                                                                                                                                                                                                                                                                                                                                                                                                                                                                                                                                                                                                                                                                                                                                                                                                                                                  |                                                                                                                                                                   |  |  |  |                                                                                     |                                                                                     |                                                                                     |                                                                                     |                                                                                     |                                                                                     |                                                                                                                                                                                                                                                                                                                                                                                                                                                                                                                                                                                                                                                                                                                                                                                                                                                                                                                                                                                                                                   |                                                                                     |                                                                                      |                                                                                       |                                                                                       |                                                                                       |                                                                                     |                                                                                      |                                                                                       |                                                                                       |                                                                                       |
|                                                                                                                                                                                                                                                                                                                                                                                                                                                                                                                                                                                                                                                                                                                                                                                                                                                                                                                                  |                                                                                                                                                                   |  |  |  |                                                                                     |                                                                                     |                                                                                     |                                                                                     |                                                                                     |                                                                                     |                                                                                                                                                                                                                                                                                                                                                                                                                                                                                                                                                                                                                                                                                                                                                                                                                                                                                                                                                                                                                                   |                                                                                     |                                                                                      |                                                                                       |                                                                                       |                                                                                       |                                                                                     |                                                                                      |                                                                                       |                                                                                       |                                                                                       |

**Option 1:** Definitely Health State A

or

**Option 2:** 3 out of 10 chance of Full Health, and 7 out of 10 chance of Health State B



*[If Option 1, go to part (e)]*

(d) Which option do you prefer:

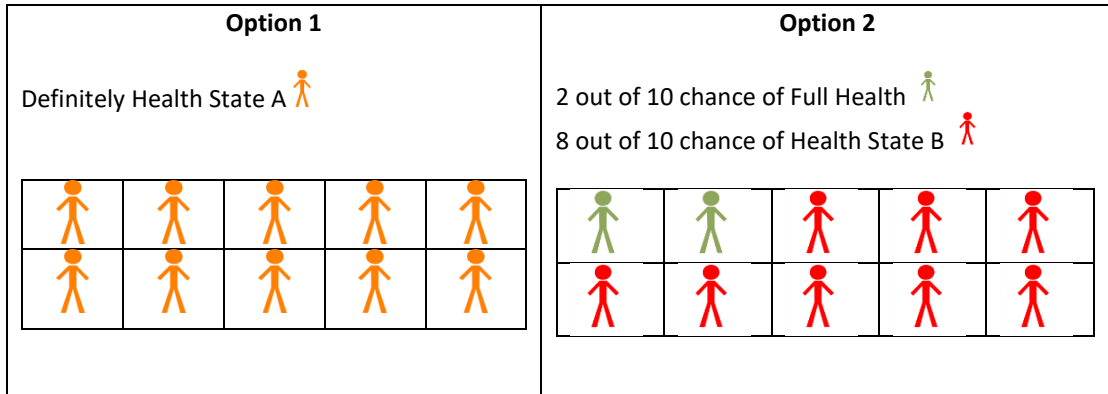

Option 1: Definitely Health State A

or

Option 2: 2 out of 10 chance of Full Health, and 8 out of 10 chance of Health State B

*[Now go to question 6.5]*

(e) Which option do you prefer:

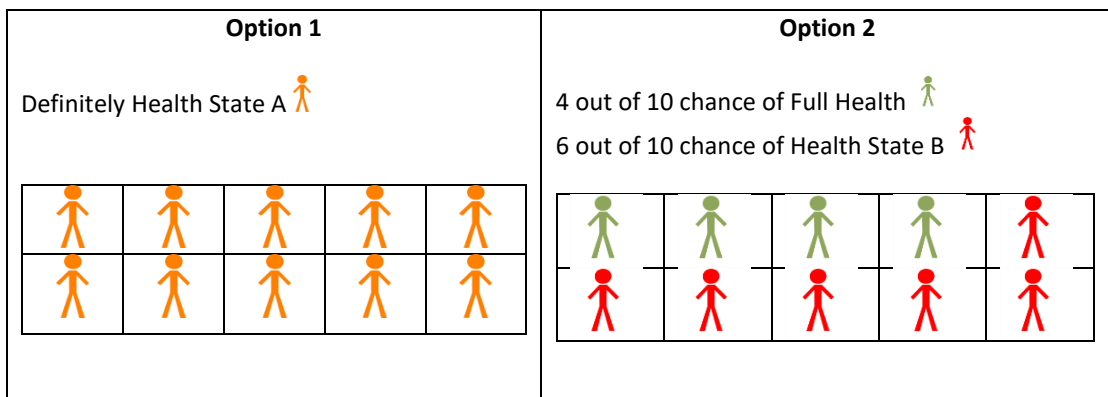

Option 1: Definitely Health State A

or

Option 2: 4 out of 10 chance of Full Health, and 6 out of 10 chance of Health State B

*[Now go to question 6.5]*

(f) Which option do you prefer:

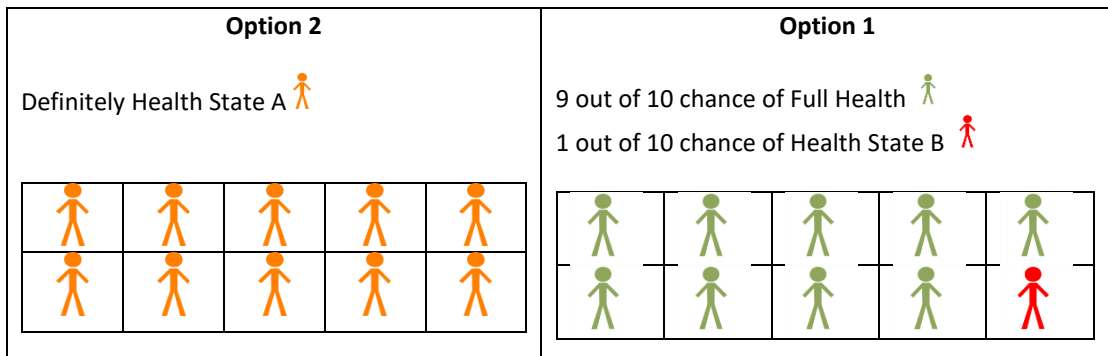

**Option 1:** Definitely Health State A  
or

**Option 2:** 9 out of 10 chance of Full Health, and 1 out of 10 chance of Health State B

*[If Option 1, go to part (j)]*

(g) Which option do you prefer:

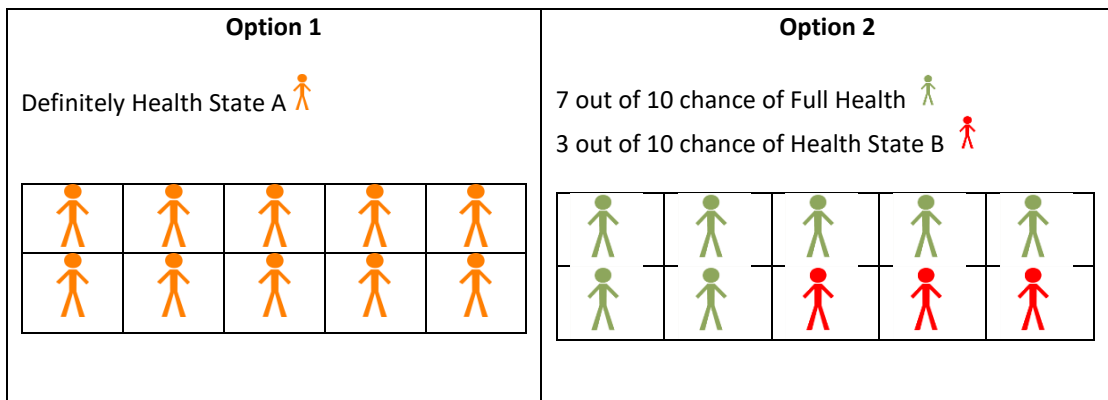

**Option 1:** Definitely Health State A  
or

**Option 2:** 7 out of 10 chance of Full Health, and 3 out of 10 chance of Health State B

*[If Option 1, go to part (i)]*

(h) Which option do you prefer:

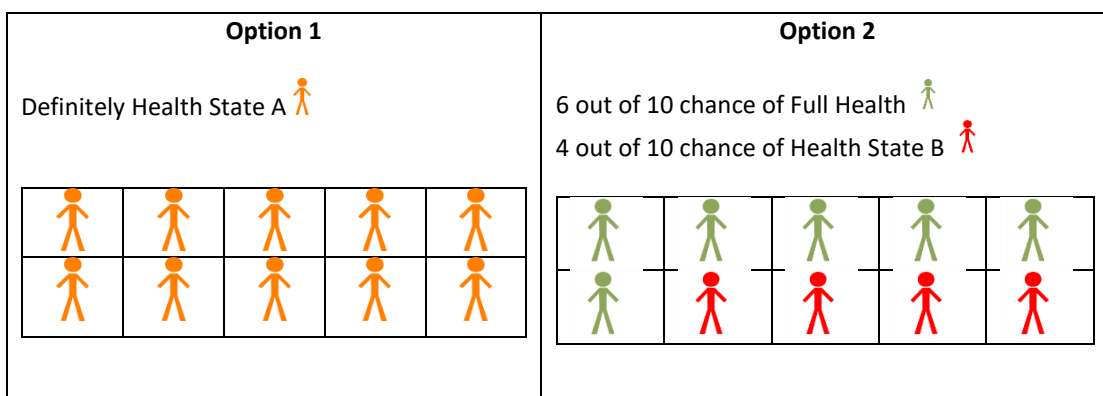

**Option 1:** Definitely Health State A  
*or*

**Option 2:** 6 out of 10 chance of Full Health, and 4 out of 10 chance of Health State B

*[Now go to question 6.5]*

(i) Which option do you prefer:

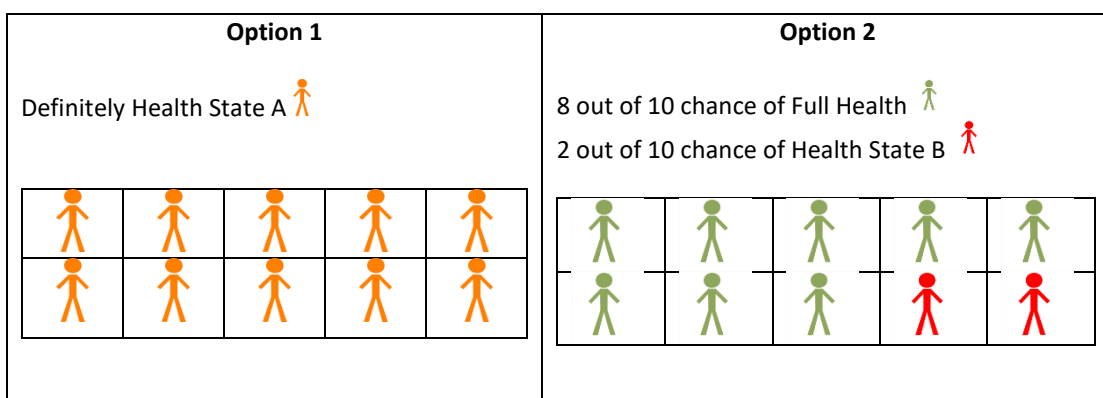

**Option 1:** Definitely Health State A  
*or*

**Option 2:** 8 out of 10 chance of Full Health, and 2 out of 10 chance of Health State B

**[Now go to question 6.5]**

(j) You have indicated that you would not prefer Option 2 to Option 1 even if the chance of Health State B in Option 2 was as low as 1 out of 10. How low would the chance of Health State B in Option 2 (*probably Full Health but a small chance of Health State B*) need to be for you to prefer Option 2 to Option 1 (*Definitely Health State A*)?

| Option 1                                                                                                                                                                                         | Option 2                                                                                                                                                                                                                       |
|--------------------------------------------------------------------------------------------------------------------------------------------------------------------------------------------------|--------------------------------------------------------------------------------------------------------------------------------------------------------------------------------------------------------------------------------|
| Definitely Health State A <br> | Probably Full Health <br>Small chance of Health State B  |

*Please indicate your answer by writing a number bigger than 10 in the box below; the number can be as big as you want, with as many digits as you need. (If you would never prefer Option 2, no matter how unlikely Health State B is, please write the letter "N" in the box instead of a number).*

*I would prefer Option 2 to Option 1, if the chance of Health State B in Option 2 was less than*

1 out of

Q6.5 VERSION 1: Do you prefer bananas or oranges?

(a) Which option do you prefer:

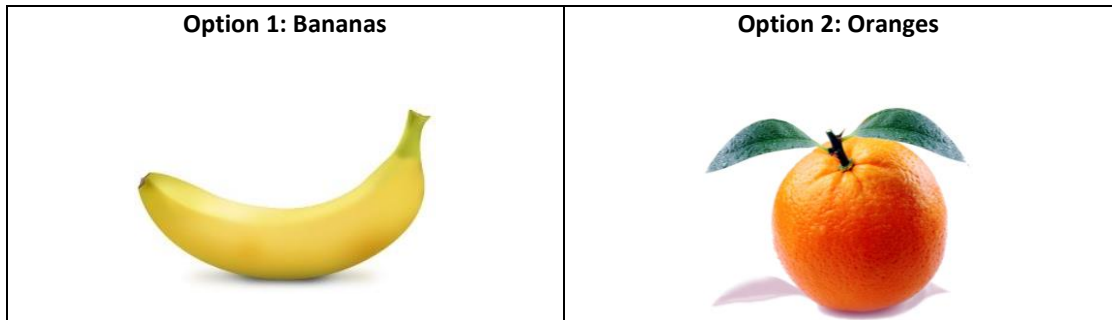

Option 1: Bananas

Option 2: Oranges

*Randomised into 2 versions. This question should exactly follow the randomisation at Q6*

Q 6.5 VERSION 2: (a) Which option do you prefer:

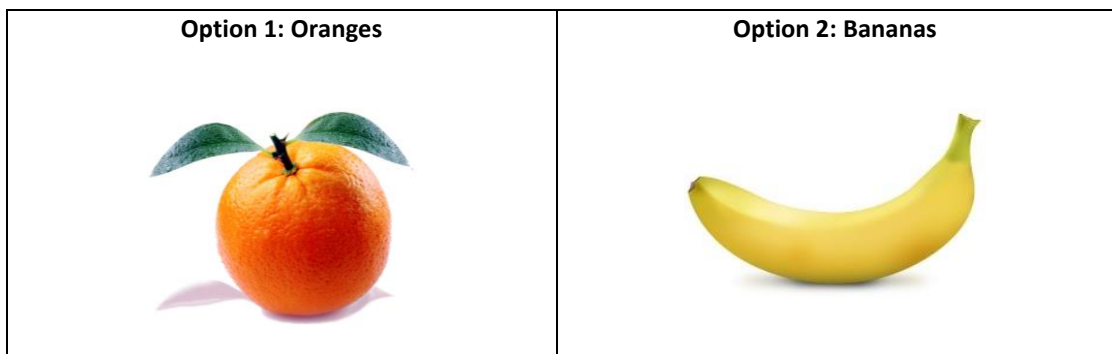

Option 1: Oranges

Option 2: Bananas

7. Now imagine that you have been in **Health State A** for the last five days: *You have*

- *a temperature,*
- *aching muscles,*
- *a headache,*
- *a dry chesty cough,*
- *a sore throat,*
- *and you feel weak.*

(a) At this point, do you think you would go to see a GP about these symptoms?

- Definitely*
- Probably*
- Probably not*
- Definitely not*
- Don't know*

***[If 'definitely not,' go to part (c)]***

(b) If you went to see a GP about these symptoms, do you think you would ask for antibiotics?

- Definitely*
- Probably*
- Probably not*
- Definitely not*
- Don't know*

(c) Do you think antibiotics would be likely to help these symptoms?

*Definitely*

*Probably*

*Probably not*

*Definitely not*

*Don't know*

(d) To the best of your knowledge, have you taken antibiotics for symptoms similar to these in the last 12 months?

Yes

No

(e) To the best of your knowledge, have you taken antibiotics for any other health problem in the last 12 months?

Yes

No

***[If respondent answers 'No' in both parts (d) and (e), go to part (g)].***

(f) To the best of your knowledge, during the last 12 months, on how many separate occasions have you been unwell and taken a course of antibiotics? *Please indicate your answer by entering a number in the box below:*

(g) If you were prescribed antibiotics for a health problem (not necessarily one described in this questionnaire) do you think you would take the full course?

*Definitely*

*Probably*

*Probably not*

*Definitely not*

*Don't know*

***[If respondent answered "no" to the first part of question 7 in Section 1 (i.e. if they have no dependent children), go to question 11]***



8. This question is about the health of your child. (If you have more than one child, think of your youngest child).

Imagine that your child has been in **Health State A** for the last five days: *He/she has*

- *a temperature,*
- *aching muscles,*
- *a headache,*
- *a dry chesty cough,*
- *a sore throat,*
- *and feels weak.*

(a) At this point, do you think you would take your child to see a GP about these symptoms?

*Definitely*

*Probably*

*Probably not*

*Definitely not*

*Don't know*

***[If 'definitely not,' go to part (c)]***

(b) If you did take your child to see a GP about these symptoms, do you think you would ask for antibiotics?

*Definitely*

*Probably*

*Probably not*

*Definitely not*

*Don't know*

(c) Do you think antibiotics would be likely to help your child in this situation?

*Definitely*

*Probably*

*Probably not*

*Definitely not*

*Don't know*

(d) To the best of your knowledge, has your child taken antibiotics for symptoms similar to these in the last 12 months?

Yes

No

(e) To the best of your knowledge, has your child taken antibiotics for any other health problem in the last 12 months?

Yes

No

***[If respondent answers 'No' in both parts (d) and (e), go to part (g)].***

(f) To the best of your knowledge, during the last 12 months, on how many separate occasions has your child been unwell and taken a course of antibiotics? *Please indicate your answer by entering a number in the box below:*

(g) If your child were prescribed antibiotics for a health problem (not necessarily one described in this questionnaire) do you think you would make them take the full course?

*Definitely*

*Probably*

*Probably not*

*Definitely not*

*Don't know*

The next question contains information about antibiotic resistance, a topic which you may have seen in the news recently.

**The information at the start of Question 11 is randomised into 3 versions, targeting respective responses of N= 1000; N=1500; N=1500**

The next question contains information about antibiotic resistance, a topic which you may have seen in the news recently.

11 Version 1: Antibiotic resistance happens when an antibiotic no longer kills or controls growing bacteria. It is an increasingly serious threat to public health. Without antibiotics that work well, many routine treatments will become increasingly dangerous. Setting broken bones, and even basic operations, rely on access to antibiotics that work. Antibiotic resistance is believed to be caused by unnecessary use of antibiotics, and inappropriate use, such as not taking them as prescribed, skipping doses, or saving them for later use.

Version 2: Most people get cold or flu symptoms every year, and these usually get better on their own. Temperatures sometimes last for days, while coughs can last for weeks, and antibiotics generally don't help. Antibiotics should not be taken for cold and flu symptoms. Taking antibiotics when they are not needed encourages bacteria to become resistant. This means antibiotics may not work for future serious illnesses that can only be cured by antibiotics. Most cold and flu symptoms are best treated at home by taking paracetamol or ibuprofen, and getting plenty of fluids and sleep.

Version 3: Most people get cold or flu symptoms every year, and these usually get better on their own. Temperatures sometimes last for days, while coughs can last for weeks, and antibiotics generally don't help. Antibiotics should not be taken for cold and flu symptoms. Taking antibiotics encourages bacteria to become resistant. Some killer diseases are already resistant to several antibiotics. Antibiotic resistance is an increasingly serious threat to everyone's health. Soon we will not be able to find antibiotics that can cure serious illnesses. Even worse, without antibiotics that work, even minor injuries and routine operations will become increasingly dangerous. You can also pass on resistant bugs to people you care about. Most cold and flu symptoms are best treated at home by taking paracetamol or ibuprofen, and getting plenty of fluids and sleep.

(a) To what extent is this information new to you?

- Very new*
- Somewhat new*
- Not very new*
- Not at all new*

(b) How will this information affect whether you visit a doctor the next time you have symptoms like Health State A? (**Health State A**: You have

- a temperature,
- aching muscles,
- a headache,
- a dry chesty cough,
- a sore throat,
- and you feel weak ).

*Much more likely to visit doctor*

*More likely to visit doctor*

*The information would not affect whether I visit doctor*

*Less likely to visit doctor*

*Much less likely to visit doctor*

*Don't know*

(c) How will this information affect the likelihood of you asking a doctor for antibiotics if you were to visit for these symptoms?

*Much more likely to ask for antibiotics*

*More likely to ask for antibiotics*

*The information would not affect whether I ask for antibiotics*

*Less likely to ask for antibiotics*

*Much less likely to ask for antibiotics*

*Don't know*

***[If respondent answered no to first part of question 7 in Section 1 (i.e. if they have no dependent children), go now to part (f).]***

Parts (d) and (e) are about the health of your child. If you have more than one child, think of your youngest child.

(d) How will this information affect whether you take your child to visit a doctor the next time he/she has symptoms like Health State A? (**Health State A:** He/she has

- a temperature,
- aching muscles,
- a headache,
- a dry chesty cough,
- a sore throat,
- and feels weak).

*Much more likely to take child to visit doctor*

*More likely to take child to visit doctor*

*The information would not affect whether I take child to visit doctor*

*Less likely to take child to visit doctor*

*Much less likely to take child to visit doctor*

*Don't know*

(e) How will this information affect the likelihood of you asking a doctor for antibiotics for your child if you were to visit for these symptoms?

*Much more likely to ask for antibiotics*

*More likely to ask for antibiotics*

*The information would not affect whether I ask for antibiotics*

*Less likely to ask for antibiotics*

*Much less likely to ask for antibiotics*

*Don't know*

(f) To what extent does this information worry you?

*Very much*

*Somewhat*

*Not very*

*Not at all*



(g) To what extent is this information relevant to you?

- Very relevant*
- Somewhat relevant*
- Not very relevant*
- Not at all relevant*

(h) By not taking antibiotics for cold and flu symptoms, how much can you personally help reduce the threat of antibiotic resistance?

- Very much*
- Somewhat*
- Not very much*
- Not at all*

(i) If most people did not take antibiotics for cold and flu symptoms, how much would this help reduce the threat of antibiotic resistance?

- Very much*
- Somewhat*
- Not very much*
- Not at all*

(j) How confident are you that you can manage future cold and flu symptoms at home, without taking any antibiotics?

*Very confident*

*Somewhat confident*

*Not very confident*

*Not at all confident*

### Section 3

Some scientific studies have shown that certain attitudes towards health and healthy behaviour, are related to personality. To help us to learn more about this, we would like to finish the questionnaire by asking you some questions about how you see yourself.

How well do the following statements describe your personality?

1. (a) "I see myself as someone who is reserved."

- Agree strongly*
- Agree a little*
- Neither agree nor disagree*
- Disagree a little*
- Disagree strongly*

(b) "I see myself as someone who is generally trusting."

- Agree strongly*
- Agree a little*
- Neither agree nor disagree*
- Disagree a little*
- Disagree strongly*

(c) "I see myself as someone who tends to be lazy."

*Agree strongly*

*Agree a little*

*Neither agree nor disagree*

*Disagree a little*

*Disagree strongly*

(d) "I see myself as someone who is relaxed, handles stress well."

*Agree strongly*

*Agree a little*

*Neither agree nor disagree*

*Disagree a little*

*Disagree strongly*

(e) "I see myself as someone who has few artistic interests."

*Agree strongly*

*Agree a little*

*Neither agree nor disagree*

*Disagree a little*

*Disagree strongly*

(f) "I see myself as someone who is outgoing, sociable."

*Agree strongly*

*Agree a little*

*Neither agree nor disagree*

*Disagree a little*

*Disagree strongly*

(g) "I see myself as someone who tends to find fault with others."

*Agree strongly*

*Agree a little*

*Neither agree nor disagree*

*Disagree a little*

*Disagree strongly*

(h) "I see myself as someone who does a thorough job."

*Agree strongly*

*Agree a little*

*Neither agree nor disagree*

*Disagree a little*

*Disagree strongly*

(i) "I see myself as someone who gets nervous easily."

*Agree strongly*

*Agree a little*

*Neither agree nor disagree*

*Disagree a little*

*Disagree strongly*

(j) "I see myself as someone who has an active imagination."

*Agree strongly*

*Agree a little*

*Neither agree nor disagree*

*Disagree a little*

*Disagree strongly*

2. (a) How do you see yourself? Are you generally a person who is fully willing to take risks or do you try to avoid taking risks? *Please choose a box on the scale below, where 0 means "risk averse" and 10 means "fully prepared to take risks":*

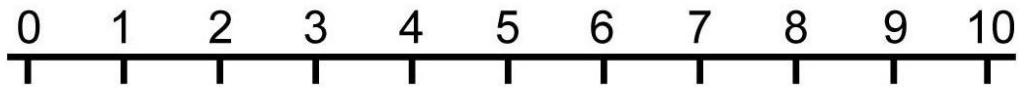

Not at all prepared to  
take risks

Fully prepared to take  
risks

(b) People can behave differently in different situations. How would you rate your willingness to take risks with your health? *Please choose a box on the scale below, where 0 means "risk averse" and 10 means "fully prepared to take risks":*

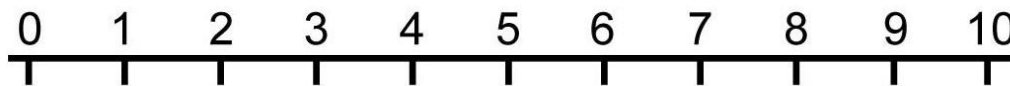

Not at all prepared to  
take risks

Fully prepared to take  
risks



Finally, if you have any other comments, please enter them here.

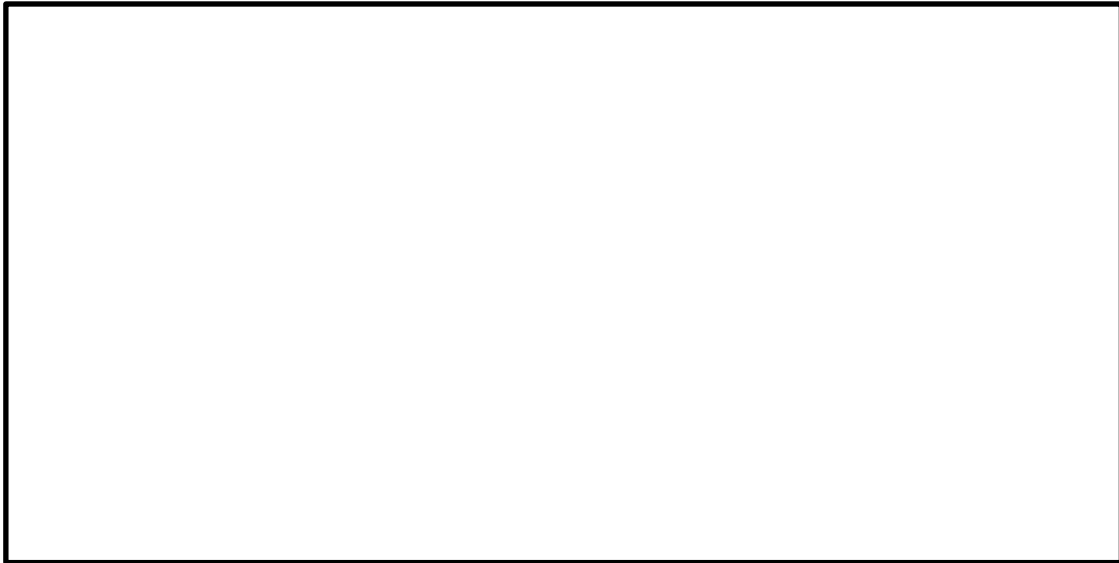A large, empty rectangular box with a black border, intended for the user to enter any additional comments or feedback.

**You have now reached the end of the questionnaire. Thank you very much for taking the time to complete it. The information you have provided will be extremely useful for our research. We would like to remind you that all the information you have given will be anonymised and stored securely.**

## Supplementary Figures

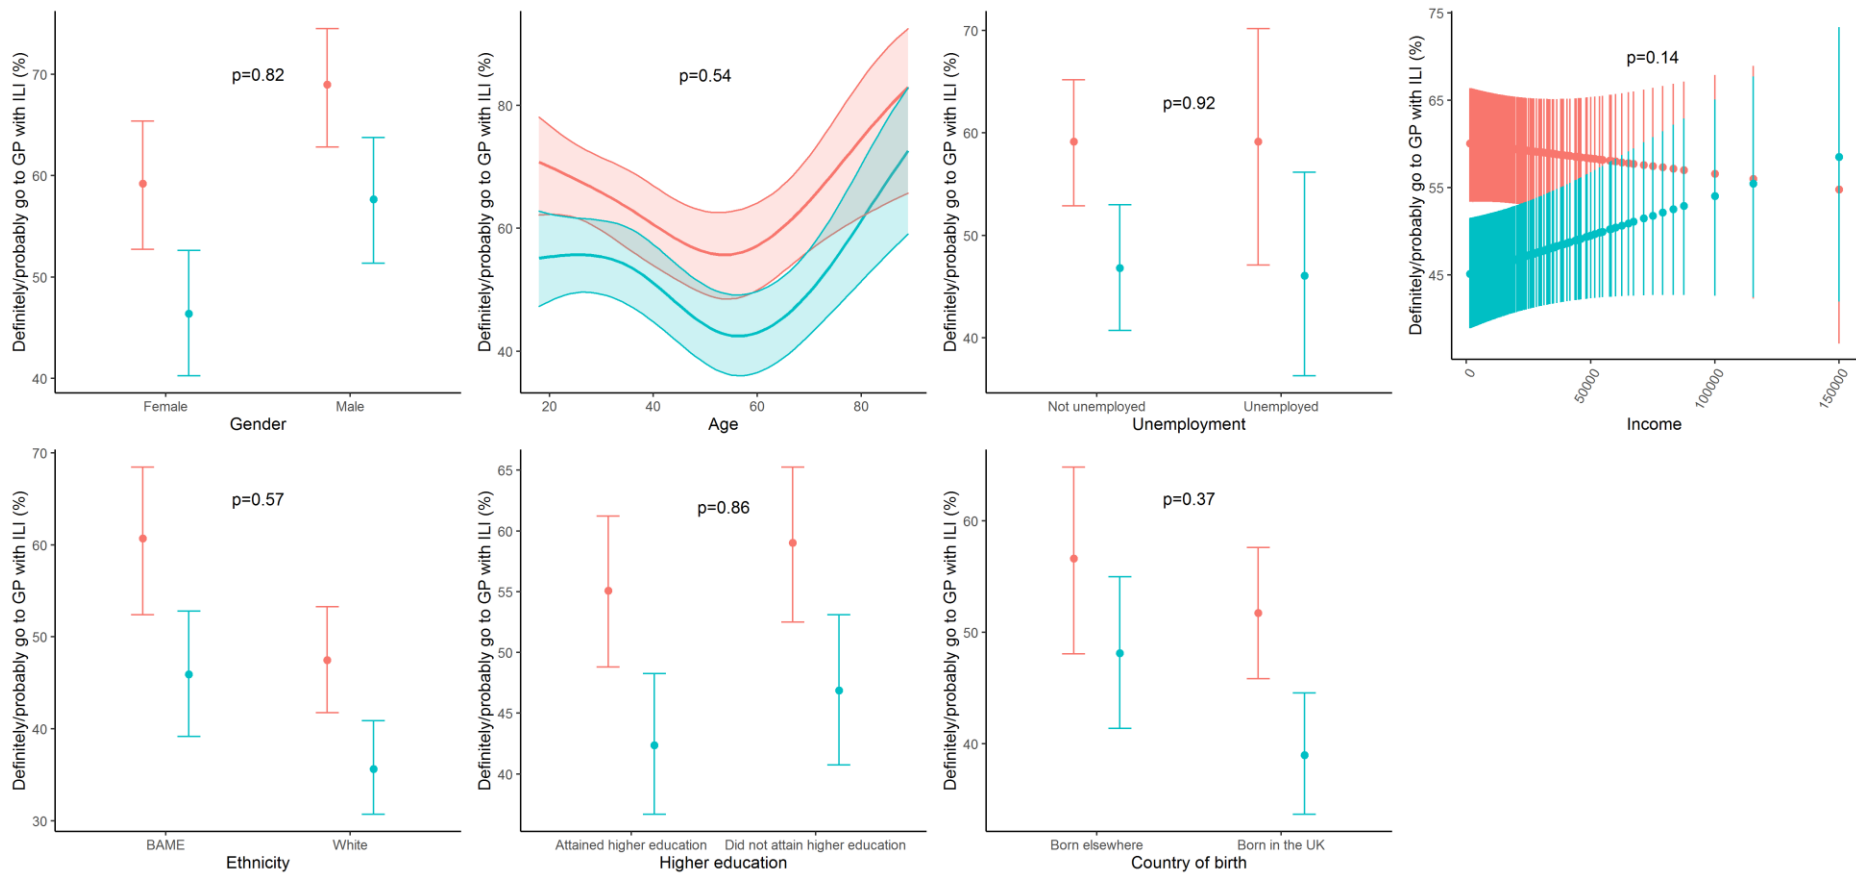

**Figure S1. Changes from Survey 1 (red) to Survey 3 (blue) in percentage of individuals would go to the GP with ILI by population subgroup**

NOTES: 1. Marginal averaged percentages and 95% confidence intervals by population subgroup for going to GP with ILI for survey 1 (May-June 2015; red dots and lines) and survey 3 (March 2017; blue dots and lines). 2. P-values are given for the interaction between each characteristic and survey number (time).

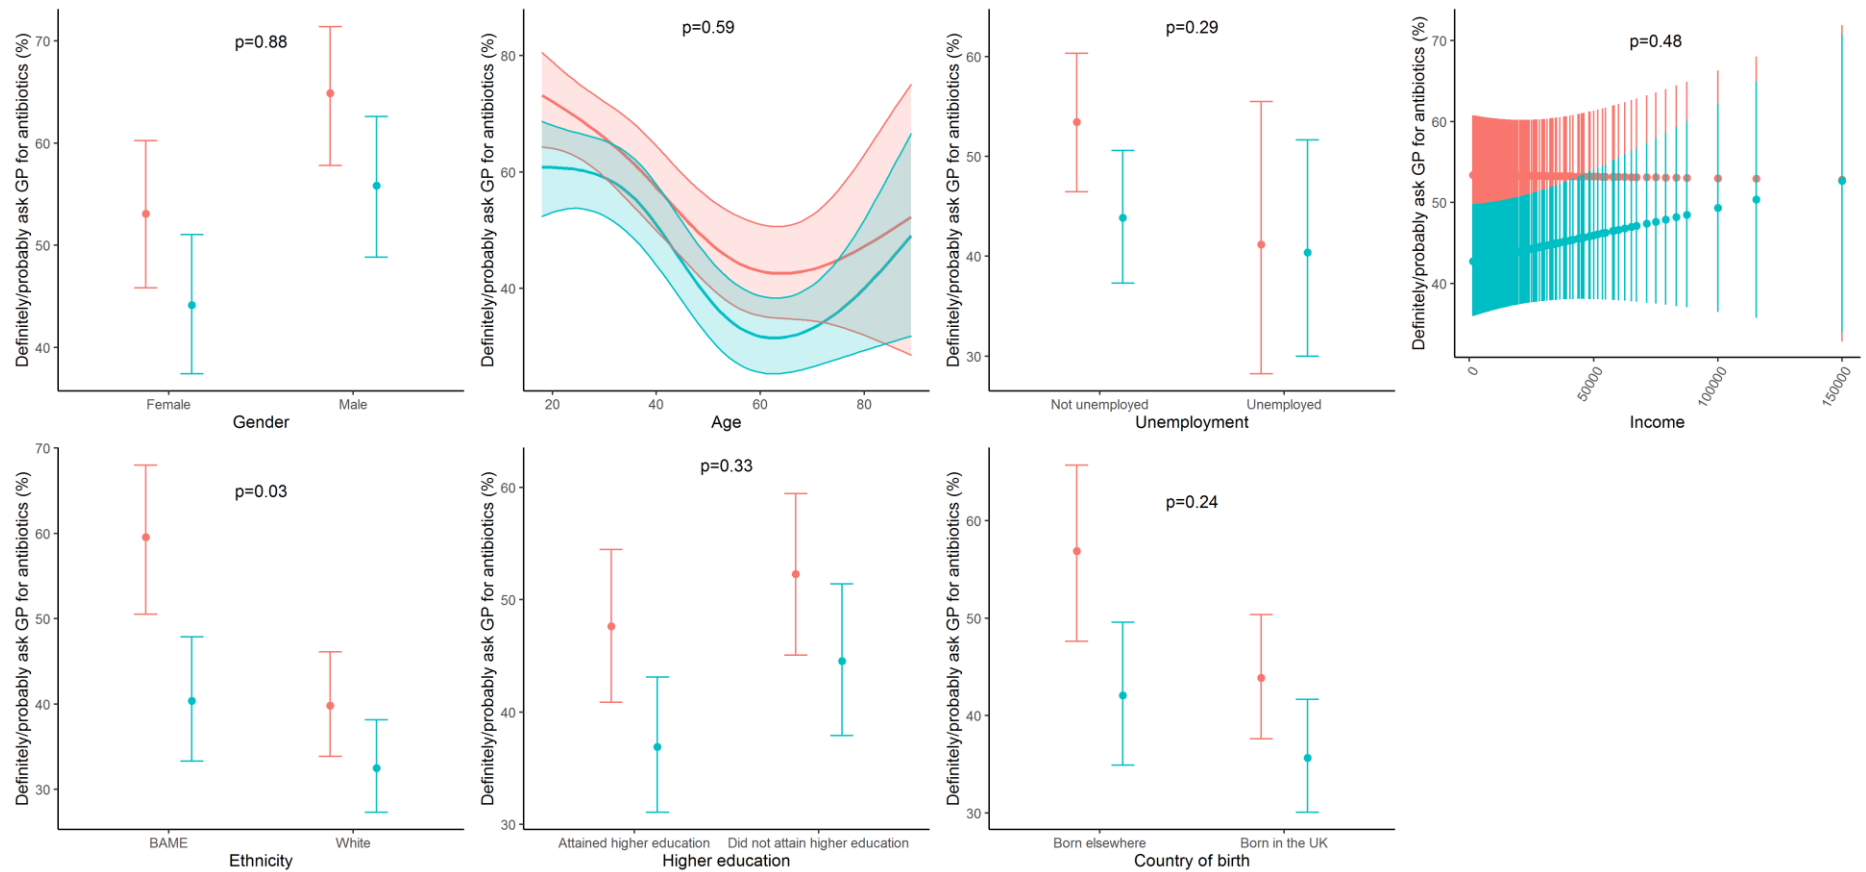

**Figure S2. Changes from Survey 1 (red) to Survey 3 (blue) in percentage of individuals would ask for antibiotics by population subgroup**

NOTES: 1. Marginal averaged percentages and 95% confidence intervals by population subgroup for going to GP with ILI for survey 1 (May-June 2015; red dots and lines) and survey 3 (March 2017; blue dots and lines). 2. P-values are given for the interaction between each characteristic and survey number (time).

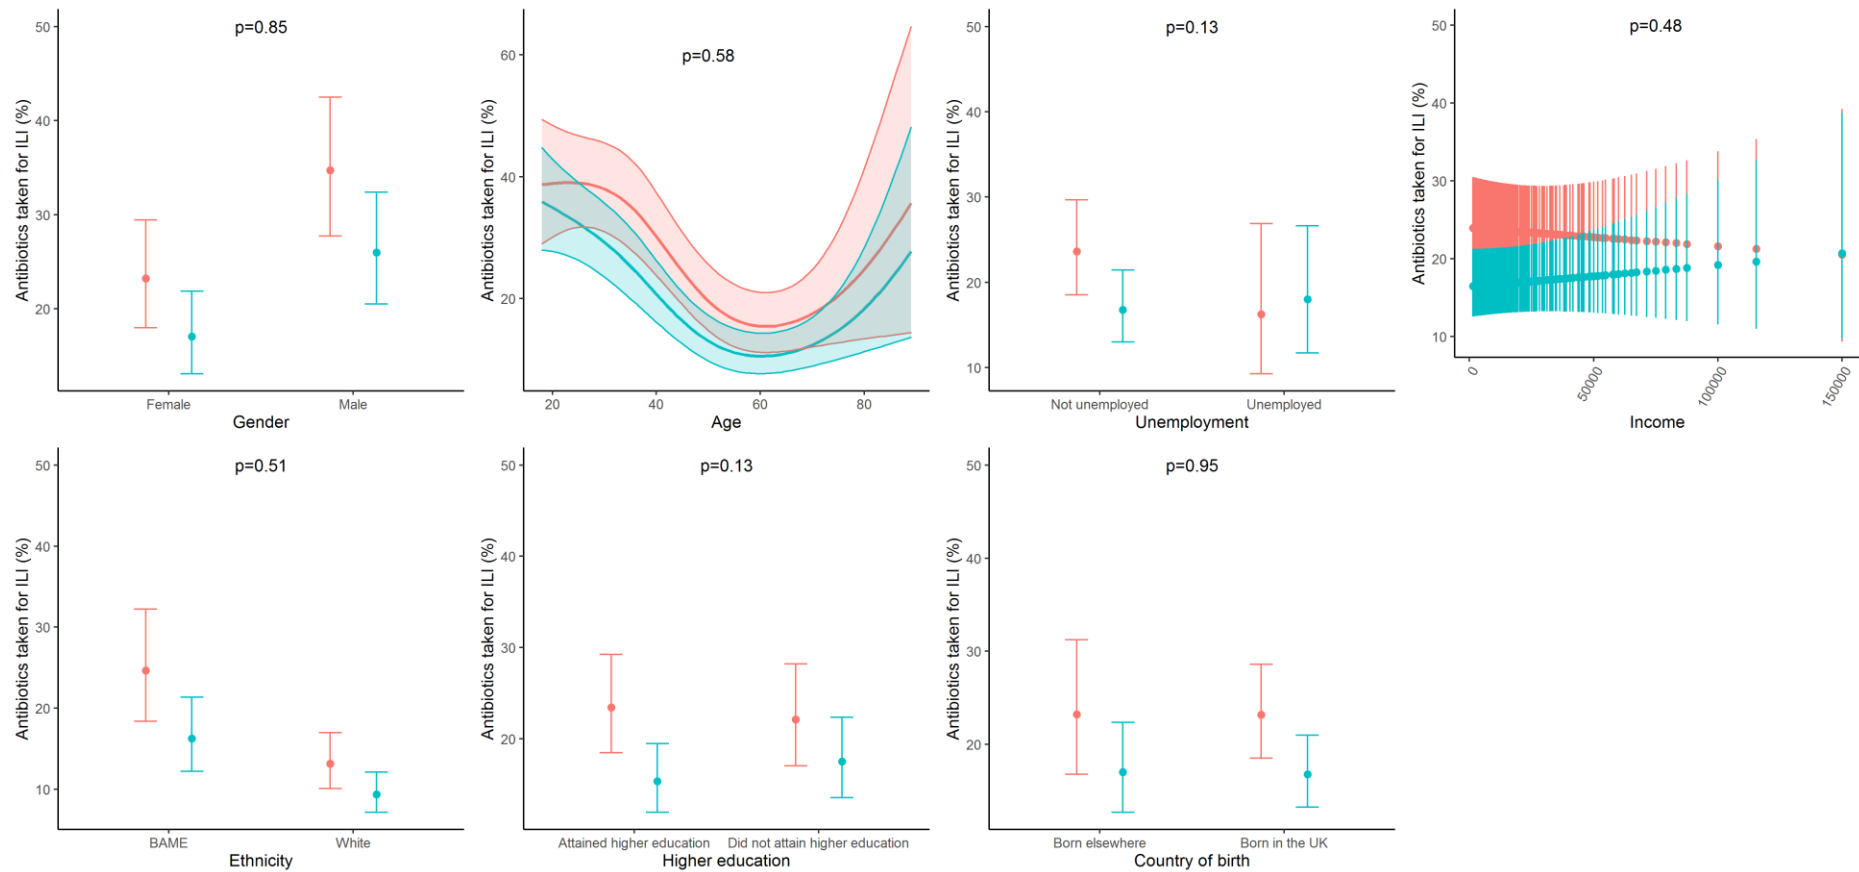

**Figure S3. Changes from Survey 1 (red) to Survey 3 (blue) in percentage of individuals that have taken antibiotics for ILI in past 12 months by population subgroup**

NOTES: 1. Marginal averaged percentages and 95% confidence intervals by population subgroup for having taken antibiotics for ILI in past 12 months for survey 1 (May-June 2015; red dots and lines) and survey 3 (March 2017; blue dots and lines). 2. P-values are given for the interaction between each characteristic and survey number (time).

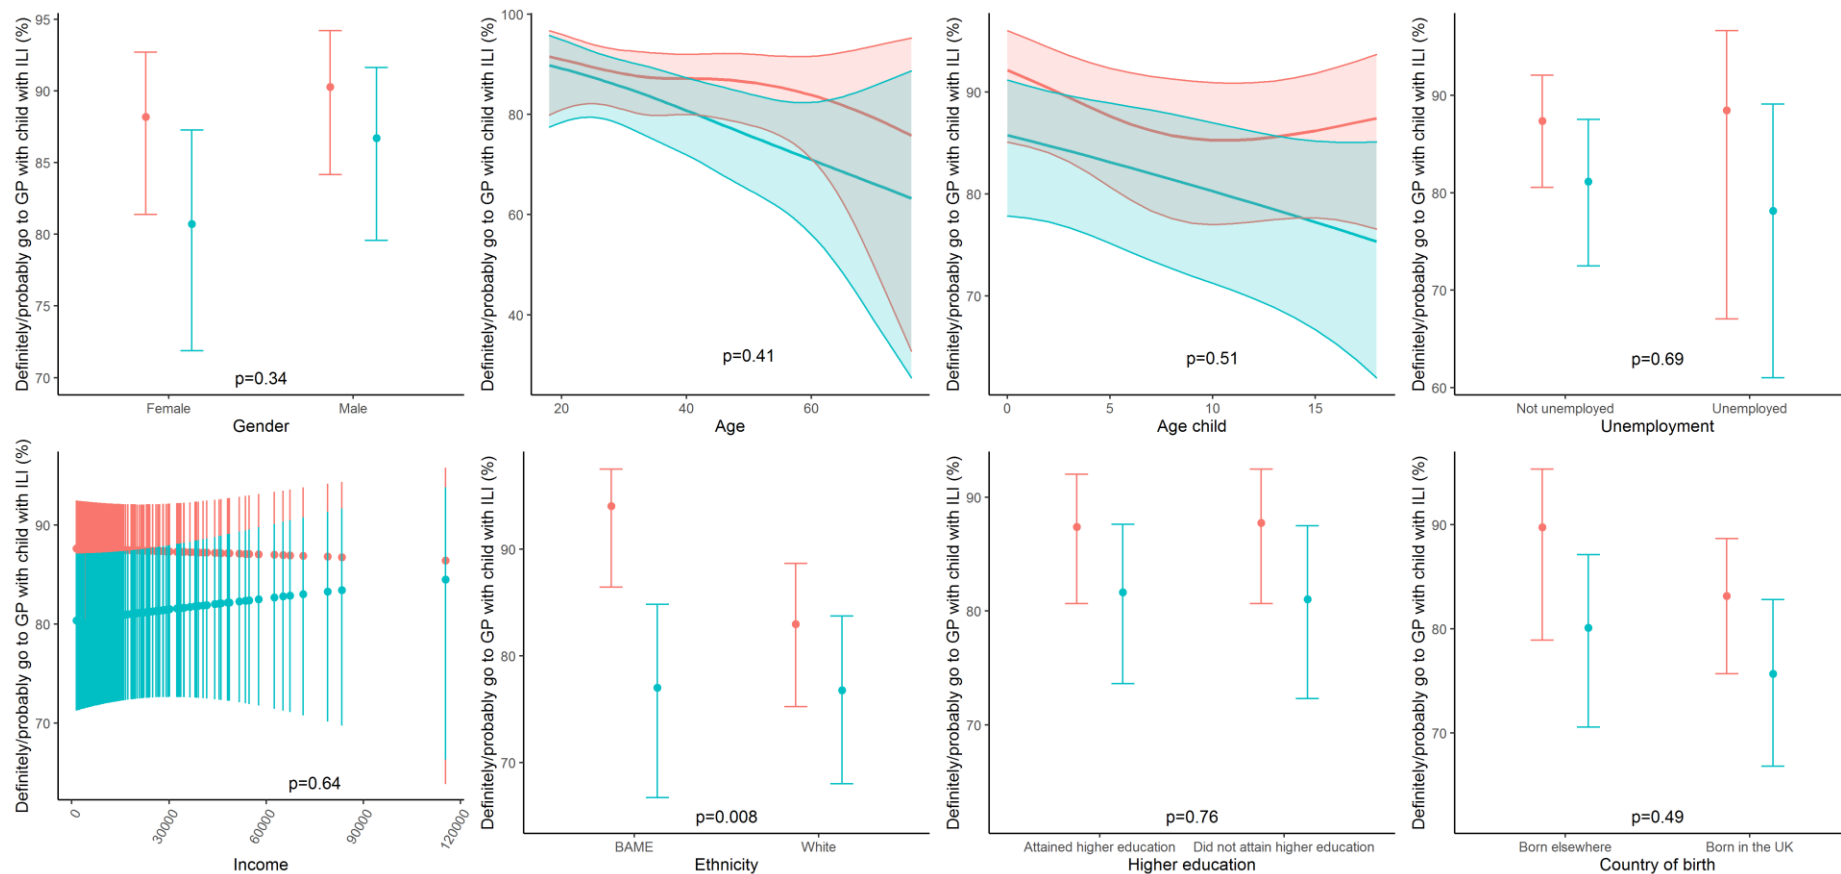

**Figure S4. Changes from Survey 1 (red) to Survey 3 (blue) in percentage of individuals that would go to GP with child with ILI by population subgroup**

NOTES: 1. Marginal averaged percentages and 95% confidence intervals by population subgroup for going to GP with child with ILI for survey 1 (May-June 2015; red dots and lines) and survey 3 (March 2017; blue dots and lines). 2. P-values are given for the interaction between each characteristic and survey number (time).

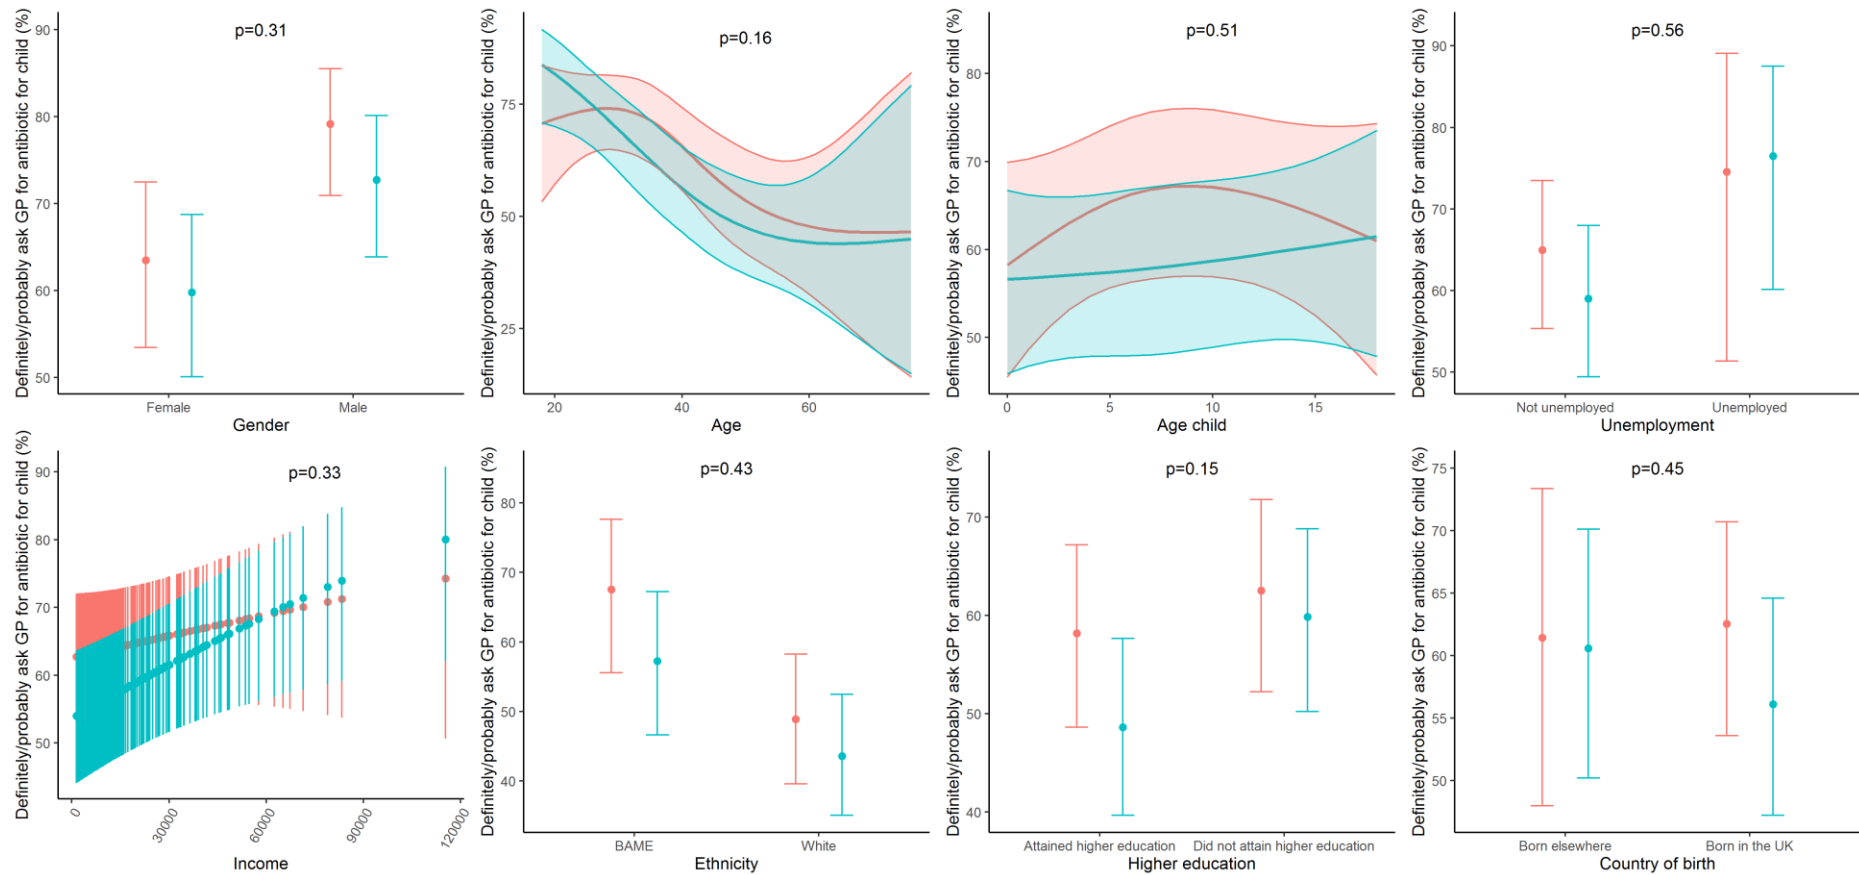

**Figure S5. Changes from Survey 1 (red) to Survey 3 (blue) in percentage of individuals that would ask for antibiotics for child with ILI by population subgroup**

NOTES: 1. Marginal averaged percentages and 95% confidence intervals by population subgroup for asking antibiotics for child with ILI for survey 1 (May-June 2015; red dots and lines) and survey 3 (March 2017; blue dots and lines). 2. P-values are given for the interaction between each characteristic and survey number (time)

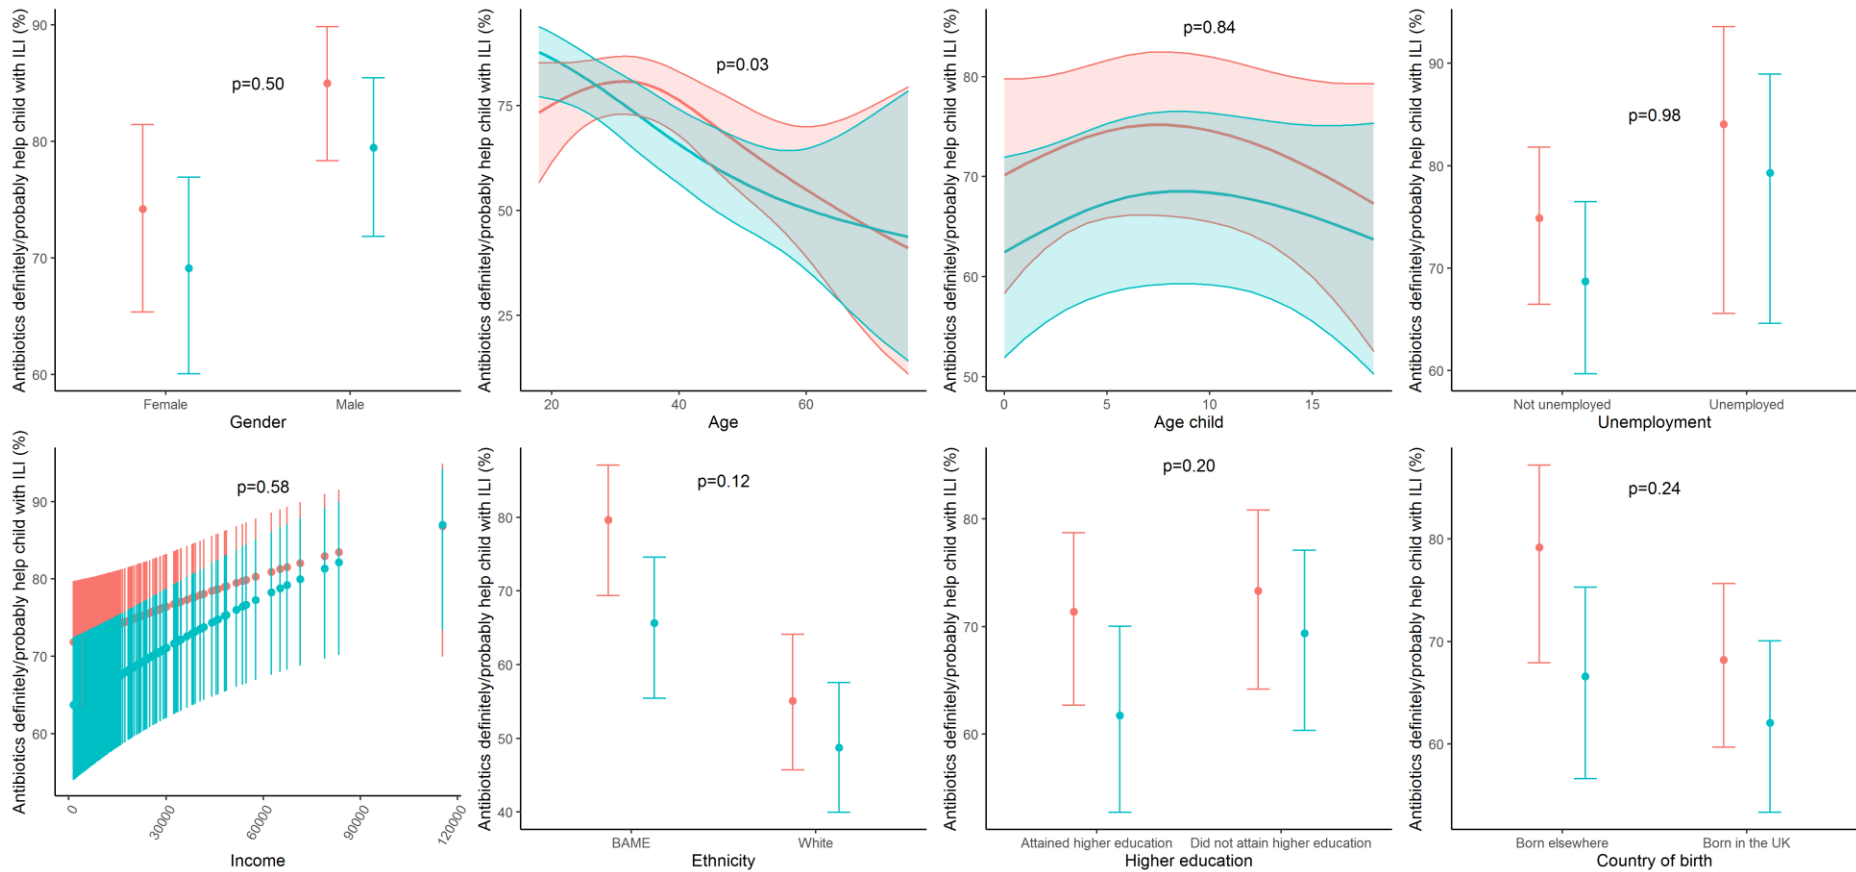

**Figure S6. Changes from Survey 1 (red) to Survey 3 (blue) in percentage of individuals that think antibiotics would help for child with ILI by population subgroup**

NOTES: 1. Marginal averaged percentages and 95% confidence intervals by population subgroup for thinking antibiotics would help for child with ILI for survey 1 (May-June 2015; red dots and lines) and survey 3 (March 2017; blue dots and lines). 2. P-values are given for the interaction between each characteristic and survey number (time).

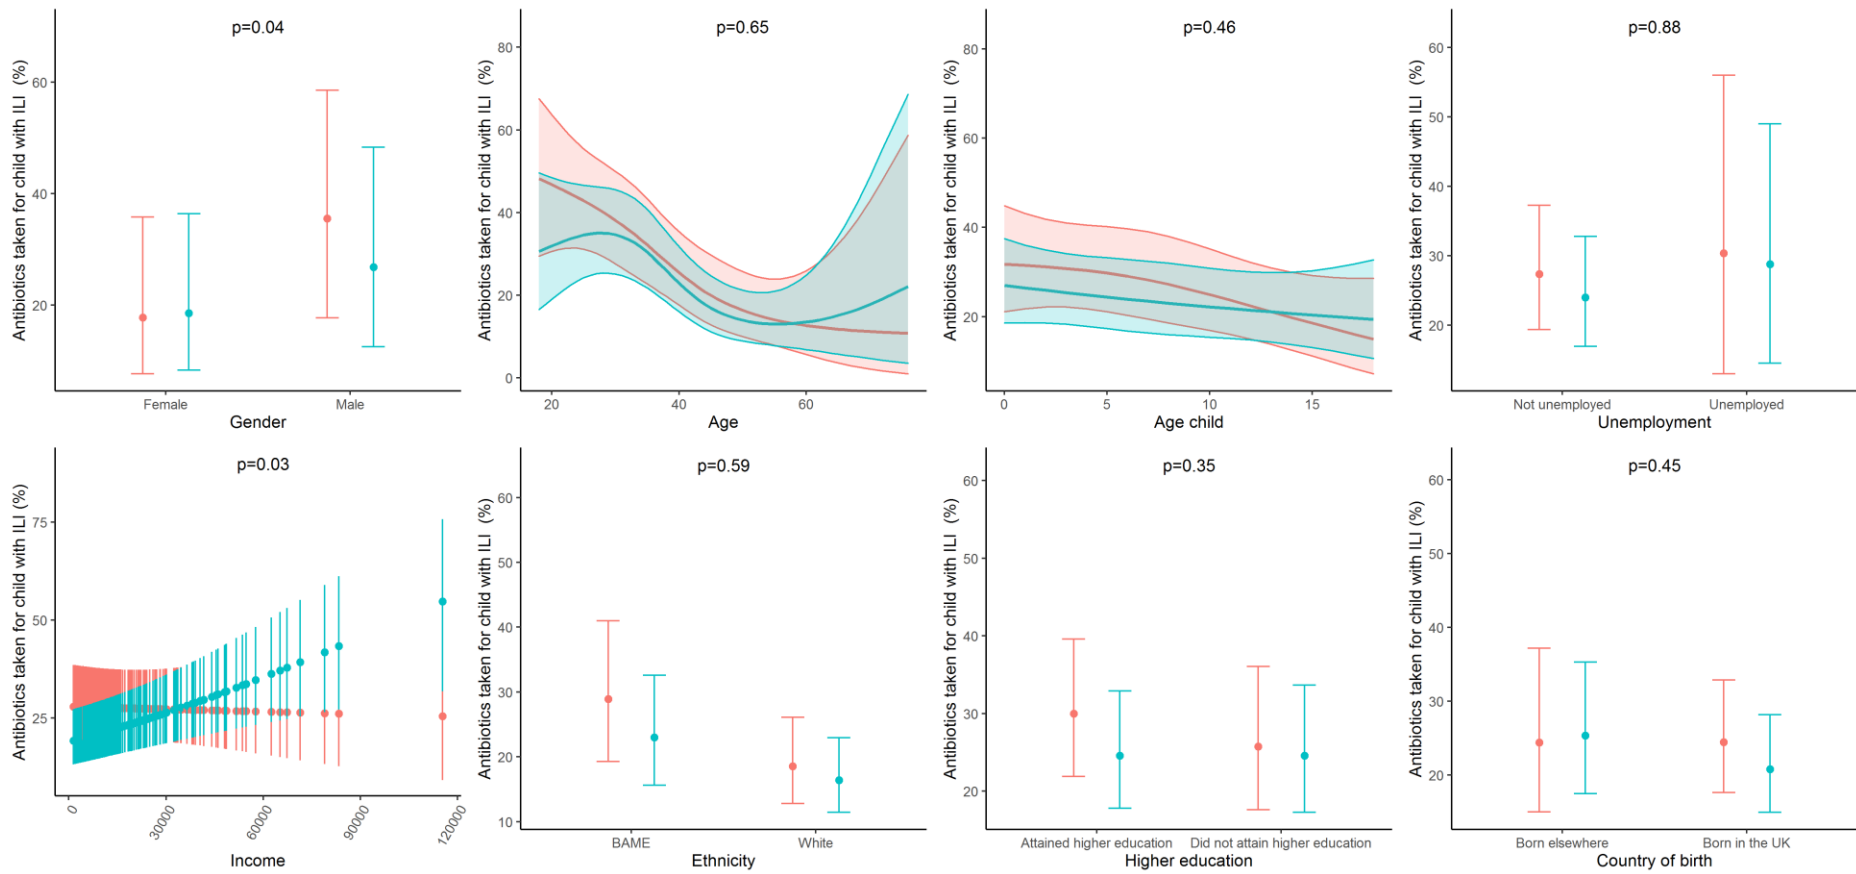

**Figure S7. Changes from Survey 1 (red) to Survey 3 (blue) in percentage of individuals for which child has taken an antibiotic for ILI in the past 12 months by population subgroup**



NOTES: 1. Marginal averaged percentages and 95% confidence intervals by population subgroup for having taken an antibiotic for child with ILI in past 12 months. for survey 1 (May-June 2015; red dots and lines) and survey 3 (March 2017; blue dots and lines). 2. P-values are given for the interaction between each characteristic and survey number (time).

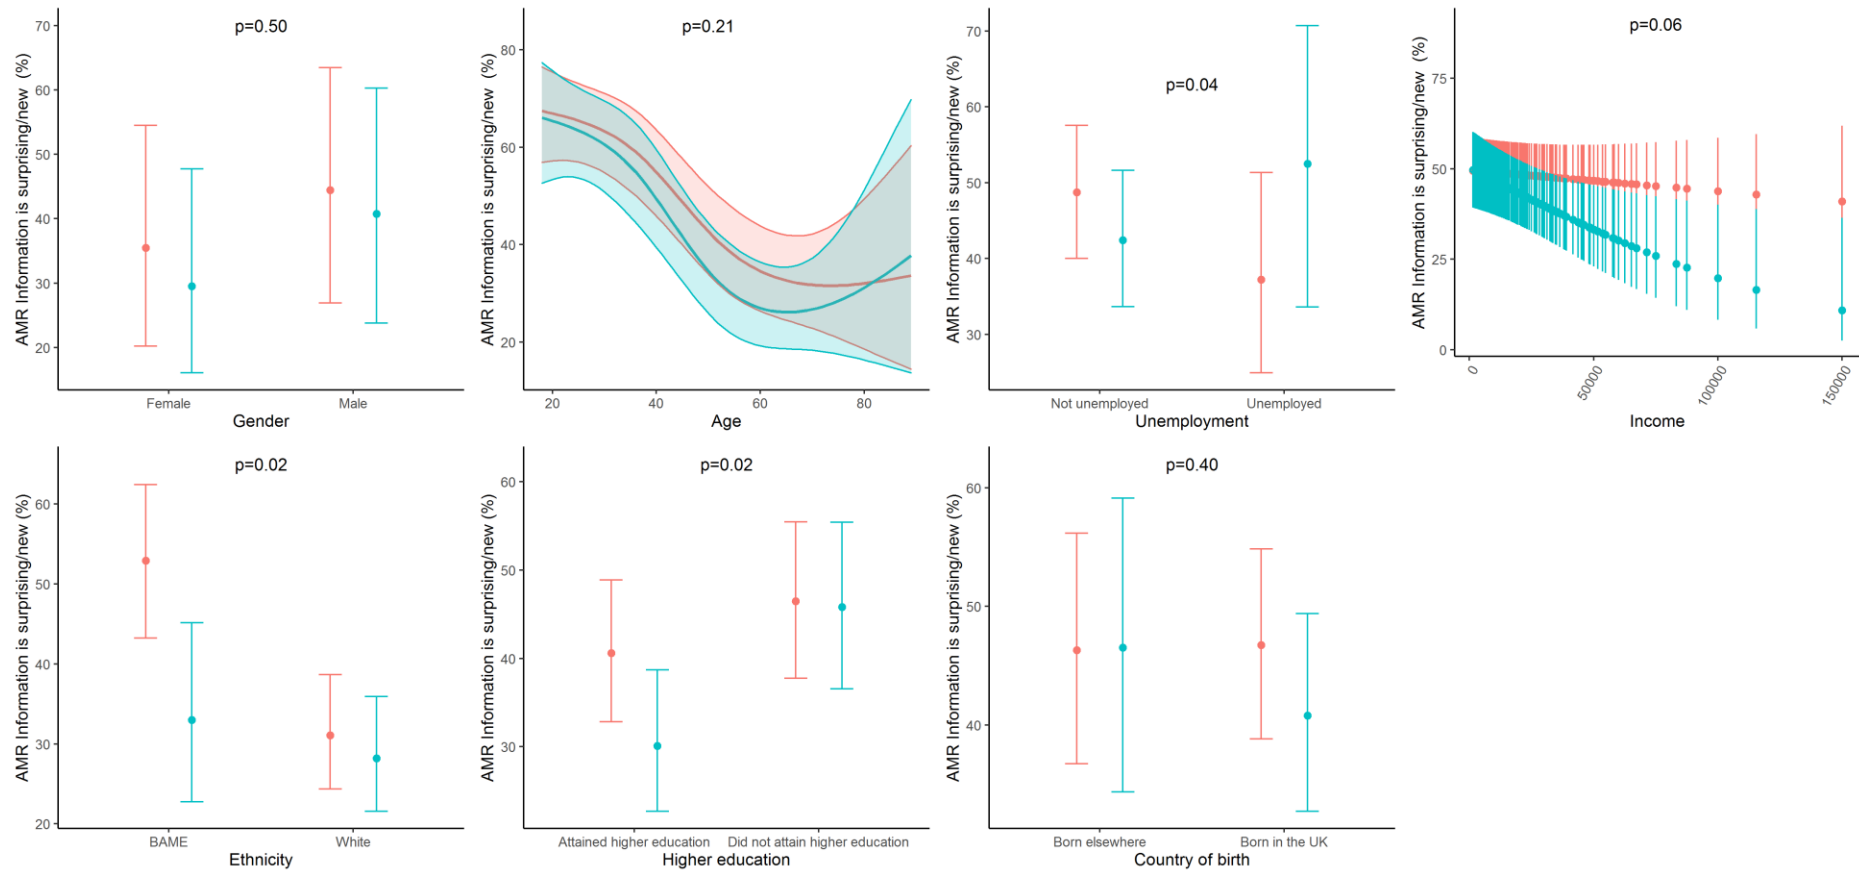

**Figure S8. Changes from Survey 1 (red) to Survey 3 (blue) in percentage of individuals for which AMR information was surprising/new by population subgroup**

NOTES: 1. Marginal averaged percentages and 95% confidence intervals by population subgroup for which AMR information was surprising/new for survey 1 (May-June 2015; red dots and lines) and survey 3 (March 2017; blue dots and lines). 2. P-values are given for the interaction between each characteristic and survey number (time).
